# Supplementary material
Source: publisher figshare collection journal article supplement (https://tandf.figshare.com/articles/dataset/_/16583721)
Supplement: Supplementary file 1 [file 1]

## Supplemental Resource

### Relationships within *Timmia*, especially within *T. austriaca* (Musci, Timmiaceae)

Lars Hedenäs

Department of Botany, Swedish Museum of Natural History, Box 50007, 104 05 Stockholm, Sweden

**CONTACT** Lars Hedenäs lars.hedenas@nrm.se

Alignment for Figure 2: 26S from positions 1 to 620 (SIC coding, 622–626), *atpB-rbcL* from 628 to 1350 (SIC coding, 1352–1414), and *trnL-trnF* from 1416 to 1874 (SIC coding, 1876–1894). FASTA format.

```
>DQ397131_Funaria_hygroetrica_26S_Goffinet_5576_CONN
AAATCGGGGTGCTTCGTGCCCCGAATTGTAGTCTGGAGAAGCGTCCTCTGCAGCGGGTCGGCCCCAAGTTCCTGGAATG
GGATGCCCAAGAGGGGTGACAGCCCCGTGAGGCGCGGTCCCTGCTGCTCCACGAGGCGCGATCTGCGAGTCGGGCTGTTTG
GGAATGCAGCCCTAAATGGGTGGTAAATTCATCTAAGGCTAAATATTGGCAAGAGACCGATAGCGAACAAGTACCGCGA
GGGAAAGATGAAAAGGACTTTGAAAAGAGAGTTAAACAGTGCTTGAAATTGCTGGGAGGGAAGCGAATGGAAGCTGCGGG
TGTGCCCCGGTTGGATGTGGAACGGCTTCGGCTGGTCTGCCGCTCAACGCGGGGCACTGGTCAGCGTGGGCTACCTCGGC
GGGACAAGAGCGGGATGTAGTTTCCCGCTATGCCGCGGAGGTGGCCGAGGCACGAAGCGCGCGGGCCCCCTCGGGGTGCTG
GGA--CTCGTCCCAACTGCGCGCTCGGGACGCTGGCGTATTGAGCTCTTCATCCGACCCGTCTTGAAACACGGACCAAGG
AGTCTAACATGTATGCGAGCAGGTGGGCGGCAAACCCATTGATGCGTAAGTAACTGACA-AAT?A-NNNNNNNNNNNA
AAT-AAATT-----GA---AATTGAAAAAATAATATAAATTTGAATTGTAATTAAATTGAAATTGAAAAAGTTTAC
TGTTAGTTAGACTCATTTTCGATCAATTGGTTATTTTAGTTAATTAGAAAAATAAAGTACTTGGTTATTTTAAATTAAATT
TA-CTA-----TTATA---TTGA-TATATAAC--ATATATATATGT-TATATA-AA-TATATTT-ATAA-----
TTA-----AACAAATAA---CAAAAAATTGTAGTTCTTA-----
--AAAAAGTCTT----TT-----AATAAAAAAAGATTTGATTTATTATACTTTCTTTT-----TT
ATTGTTTGGTA---ACCTTTTAGAATTAAA-----TTAATTAAATTT-ATTT--AATAATTAGTTTAATATTTA
AAAGATTTTGTAGATTAATATTTAACAAA-----ATTATTAATAAATAATCTGAGTTGCATCAAATGTAGAAAAATA
ATATACAATAATAC-GTTTTGTTATAAAAAAATTACTTTGTCTAAAA-CTAGACAAAATTAAATATCAATTAAGTTTTT
TTATAAAAAAT-----AAAAAATCTTATTTGTGCGAGTAGACCTCATCTTTTCAAGAGTTATTAATTGAG-TTTAAAAA
TTAATTTAAATAAATTATT?TATAT???TTAAA?TTATTTATTATAAA?TAA-CTTAAAAAATAATTTGAGCTTTAAT
AAAAAACTTATTAAATGCTAGCTTTCAGATTCAGGGAACTTAGGTTGAAAAAGTATAAGCAATCCTGAGCCAAATCT
TCTATATTTTTTAATAAGATAGGTGCAGAGACTCAATGGAAGCTATCCTAACGCATAAT---TT----TTTTTTT-AAT--
-----TTA-----TACA---AAATTTAATTAAA-----TTA----AAAATCGAGGGTAAAGAGAGAGTCCAATTT
TACATGTTAATTTAGCAACAATTCAAATTGTAGTAAAAAGAAAATCCGTTGGCTTAAGTGACCGTGAGGGTTCAAGTCC
CTCTTCCCCCA-----AAAGTATTTAATAAAAAAAGTTAATGTACTTTCTAAAAATTATTTTTTTATTGACACAACT
TTTAATTTATGTTAGTATGTTT-ACGTAAACAA-AATTTTTTTT?TAAAAAAT
>P620
AAATCGTGGTGCCTTGACCTCGAATTGTAGTCTGGAGAAGTGTCCTCTGCAACGGACCAGACCCAAGTTCCTGGAAG
TGGCGTCAGAGAGGGTGAAAACCCCGTCGAGTCTGGACACTGTTGCAAAACGAGGCACTGTCTGCGAGTCGAGCTGTTTG
GGAATGCAGCTCTAAGTGGGTGGTAAATTCATCCAAGGCTAAATATTGGCAAGAGACCGATAGCGAACAAGTACCGCGA
GGGAAAGATGAAAAGGACTTTGAAAAGAGAGTTAAAAAGTGCTTGAAATTGCTGGGAGGGAAGCGAATGGAAGCTGCGGG
TGTGCCCTGGTTGGATGTGGAACGGTTTAGGCTGGTCCGCGCTCAACGCGGGGCACTGGTCAGCGTGGGCCATCGCGGC
GGGACAAGAGCAGGATGTAGTTTCTTGCCCTATGCCGTTGTGGTGCCGAGGAACGAAGCATGCG-CCACTTGTGG-CGTG
GTA--TTTATACCAACTGCATGCTCGGGACGCTGGCGTATTGAGCTCTTCATCCGACCCGTCTTGAAACACGGACCAAGG
AGTCTAACATGTATGCGAGCGGTGGGCGGCAAACCCATTGAGGCGCAAGTAACTGACA-TTT?A-AAAATTTGGAAGT
AATAAAATTAGTTGCTGATTGTATTGAAAAAATA-----TTT-----AGTATCA
-----ACTC-----GATCA-----
TTAATTATTGAGTAAAAATTATTATCTTGAACCTATTACTTATATATATATATATATATATAT--AAGTATATAAAATAAAAAA-
TTAAAAATTGTAACAAA-TAAATAT-----TTCTTATA-----GT
ATAGAAAGATTCTAAAATTATAAAGTGATTAAAATAAAAAAATTTCTTG-----TTCACTTAAAAAAGAA
ATTAGGCAATATTTTATTTTTTGTATTCTTTAATACGTTTTTAATTAAATTTTATTTTATTAATTAGTTTAAACATTCA
AAAGATTATTAGGTCAATGCTTAGAAAAATAAAAAATAATTTACTAAAAATAATCTGAGTTGCATCAAATATAAAAAATA
```

ATATACAATGATACTGTTTTGTTATAGGAAAA-TCAGTTTATCTAAAAAATAGACAAAATTAAATACCAAAGAAGTTTTT  
TTATAAGATT---AAAAGAAAAAACTTATTTGTCGAGCAGACCTCATCCTTGCAAGAATTATCAATTGAG-AAAATTTTT  
AAAAAAAAAAAAAAT?AAAATATATA?T???AAAATAAAAAAAAAAATAAAATAAA-CTTAAA---TAATTTGAGCTTTAGT  
AGAAAACTTACTAAATGCTAGCTTTTCAGATTCAGGGAACTTAGGTTGAAAAAGTATAAGCAATCCTGAGCCAAATTT  
TATTCCTTTAAAAATAAGATAGGTGCAGAGACTCAATGGAAGCTATCCTAACGAATAATATTTTAAGATTTTTTTT-AATTA  
AATAATTAATTAATAGAAATAAATTTAACTAAAATTTTATCTTTTATATATTAAGCGAGGATAAAGATAGAGTCCAATTT  
TACATGTTACTTTTAGCAACAATTTAAATTGTAGTAAAAAGAAAATCCGTTGGCTTTATTGACCGTGAGGGTTCAAGTCC  
CTCTACCCCCA-----AAAGT-----CTAA----CCTTTC-----TTTTATTGACATAAGCT  
CCTAGTTTATGTTACGATAGCCGAAACAAAACAA-TAAATAAAAAATTTAAATA

>P621

AAATCGTGGTGCCTTGCACCTCGAATTGTAGTCTGGAGAAGTGTCTCTGCAACGGACCAGACCCAAGTTCCTGGAAG  
TGGCGTCAGAGAGGGTGAAAACCCCGTCGAGTCTGGACACTGTTGCAAAACGAGGCACTGTCTGCGAGTCGAGCTGTTTG  
GGAATGCAGCTCTAAGTGGGTGGTAAATTCCATCCAAGGCTAAATATTGGCAAGAGACCGATAGCGAACAAGTACCGCGA  
GGGAAAGATGAAAAGGACTTTGAAAAGAGAGTTAAAAAGTGCTTGAAATTGCTGGGAGGGAAGCGAATGGAAGCTGCGGG  
TGTGCCCTGGTTGGATGTGGAACGGTTTAGGCTGGTCCGCCGCTCAACGCGGGGCACTGGTCAGCGTGGGCCATCGCGGC  
GGGACAAGAGCAGGATGTAGTTTCTTGCCATGCGGTTGTGGTGGCCGAGGAACGAAGCATGCG-CCACTTGTGG-CGTG  
GTA--TTTATACCAACTGCATGCTCGGGACGCTGGCGTATTGAGCTCTTCATCCGACCCGCTCTTGAAACACGGACCAAGG  
AGTCTAACATGTATGCGAGCCGGTGGGCGGCAAACCCATTGAGGCGCAAGTAACTGACA-TTT?A-AAAATTTGGAAGT  
AATAAAATTAGTTGCTGATTGTATTGAAAAAATA-----TTT-----AGTATCA  
-----ACTC-----GATCA-----TT  
TAATTATTGAGTAAAAATTATTATCTTGAACCTTATTACTTATATATATATATATATAT--AAGTATATAAAATAAAAAA-  
TTAAAAATTGTAACAAA-TAAATAT-----TTCTTATA-----GT  
ATAGAAAGATTCTAAAATTATAAAGTGATTAAAAATAAAAAAATTTCTTG-----TTCACCTAAAAAAGAA  
ATTAGGCAATATTTTATTTTTTGTATTCTTTAATACGTTTTTAATTAATTTTATTTTATTAATTAGTTTAACATTCA  
AAAGATTATTAGGTCAATGCTTAGAAAAATAAAATAATTTACTAAAAATAATCTGAGTTGCATCAAATATAAAAAATA  
ATATACAATGATACTGTTTTGTTATAGGAAAA-TCAGTTTATCTAAAAAATAGACAAAATTAAATACCAAAGAAGTTTTT  
TTATAAGATT---AAAAGAAAAAACTTATTTGTCGAGCAGACCTCATCCTTGCAAGAATTATCAATTGAG-AAAATTTTT  
AAAAAAAAAAAAAAT?AAAATATATA?T???AAAATAAAAAAAAAAATAAAATAAA-CTTAAA---TAATTTGAGCTTTAGT  
AGAAAACTTACTAAATGCTAGCTTTTCAGATTCAGGGAACTTAGGTTGAAAAAGTATAAGCAATCCTGAGCCAAATTT  
TATTCCTTTAAAAATAAGATAGGTGCAGAGACTCAATGGAAGCTATCCTAACGAATAATATTTTAAGATTTTTTTT-AATTA  
AATAATTAATTAATAGAAATAAATTTAACTAAAATTTTATCTTTTATATATTAAGCGAGGATAAAGATAGAGTCCAATTT  
TACATGTTACTTTTAGCAACAATTTAAATTGTAGTAAAAAGAAAATCCGTTGGCTTTATTGACCGTGAGGGTTCAAGTCC  
CTCTACCCCCA-----AAAGT-----CTAA----CCTTTC-----TTTTATTGACATAAGCT  
CCTAGTTTATGTTACGATAGCCGAAACAAAACAA-TAAATAAAAAATTTAAATA

>P622

AAATCGTGGTGCCTTGCACCTCGAATTGTAGTCTGGAGAAGTGTCTCTGCAACGGACCAGACCCAAGTTCCTGGAAG  
TGGCGTCAGAGAGGGTGAAAACCCCGTCGAGTCTGGACACTGTTGCAAAACGAGGCACTGTCTGCGAGTCGAGCTGTTTG  
GGAATGCAGCTCTAAGTGGGTGGTAAATTCCATCCAAGGCTAAATATTGGCAAGAGACCGATAGCGAACAAGTACCGCGA  
GGGAAAGATGAAAAGGACTTTGAAAAGAGAGTTAAAAAGTGCTTGAAATTGCTGGGAGGGAAGCGAATGGAAGCTGCGGG  
TGTGCCCTGGTTGGATGTGGAACGGTTTAGGCTGGTCCGCCGCTCAACGCGGGGCACTGGTCAGCGTGGGCCATCGCGGC  
GGGACAAGAGCAGGATGTAGTTTCTTGCCATGCGGTTGTGGTGGCCGAGGAACGAAGCATGCG-CCACTTGTGG-CGTG  
GTA--TTTATACCAACTGCATGCTCGGGACGCTGGCGTATTGAGCTCTTCATCCGACCCGCTCTTGAAACACGGACCAAGG  
AGTCTAACATGTATGCGAGCCGGTGGGCGGCAAACCCATTGAGGCGCAAGTAACTGACA-TTT?A-AAAATTTGGAAGT  
AATAAAATTAGTTGCTGATTGTATTGAAAAAATA-----TTT-----AGTATCA  
-----ACTC-----GATCA-----TT  
TAATTATTGAGTAAAAATTATTATCTTGAACCTTATTACTTATATATATATATATATATAT--AAGTATATAAAATAAAAAA-  
TTAAAAATTGTAACAAA-TAAATAT-----TTCTTATA-----GT  
ATAGAAAGATTCTAAAATTATAAAGTGATTAAAAATAAAAAAATTTCTTG-----TTCACCTAAAAAAGAA  
ATTAGGCAATATTTTATTTTTTGTATTCTTTAATACGTTTTTAATTAATTTTATTTTATTAATTAGTTTAACATTCA  
AAAGATTATTAGGTCAATGCTTAGAAAAATAAAATAATTTACTAAAAATAATCTGAGTTGCATCAAATATAAAAAATA  
ATATACAATGATACTGTTTTGTTATAGGAAAA-TCAGTTTATCTAAAAAATAGACAAAATTAAATACCAAAGAAGTTTTT  
TTATAAGATT---AAAAGAAAAAACTTATTTGTCGAGCAGACCTCATCCTTGCAAGAATTATCAATTGAG-AAAATTTTT  
AAAAAAAAAAAAAAT?AAAATATATA?T???AAAATAAAAAAAAAAATAAAATAAA-CTTAAA---TAATTTGAGCTTTAGT  
AGAAAACTTACTAAATGCTAGCTTTTCAGATTCAGGGAACTTAGGTTGAAAAAGTATAAGCAATCCTGAGCCAAATTT  
TATTCCTTTAAAAATAAGATAGGTGCAGAGACTCAATGGAAGCTATCCTAACGAATAATATTTTAAGATTTTTTTT-AATTA  
AATAATTAATTAATAGAAATAAATTTAACTAAAATTTTATCTTTTATATATTAAGCGAGGATAAAGATAGAGTCCAATTT  
TACATGTTACTTTTAGCAACAATTTAAATTGTAGTAAAAAGAAAATCCGTTGGCTTTATTGACCGTGAGGGTTCAAGTCC  
CTCTACCCCCA-----AAAGT-----CTAA----CCTTTC-----TTTTATTGACATAAGCT

CCTAGTTTATGTTACGATAGCCGAAACAAAACAA-TAAATAAAAAATTTAAATA  
>P623

[illegible][illegible]

>P625  
AAATCGTGGTGCCTTGCACCTCGAATTGTAGTCTGGAGAAGTGTCTCTGCAACGGACCAGACCCAAGTTCCTGCTGAAAG  
TGGCGTCAGAGAGGGTGAAAACCCCGTCGAGTCTGGACACTGTTGCAAAACGAGGCACTGTCTGCGAGTCGAGCTGTTTG  
GGAATGCAGCTCTAAGTGGGTGGTAAATTCCATCCAAGGCTAAATATTGGCAAGAGACCGATAGCGAACAAGTACCGCGA  
GGGAAAGATGAAAAGGACTTTGAAAAGAGAGTTAAAAAGTGCTTGAAATTGCTGGGAGGGAAGCGAATGGAAGCTGCGGG  
TGTGCCCTGTTGGATGTGGAACGGTTTTAGGCTGGTCCGCCGCTCAACGCGGGGCACTGGTCAGCGTGGGCCATCGCGGC  
GGGACAAGAGCAGGATGTAGTTTCTTGCCATGCCGTTGTGGTGGCCGAGGAACGAAGCATGCG-CCACTTGTGG-CGTG

GTA--TTTATACCAACTGCATGCTCGGGACGCTGGCGTATTGAGCTCTTCATCCGACCCGTCTTGAAACACGGACCAAGG  
AGTCTAACATGTATGCGAGCCGGTGGGCGGCAAACCCATTGAGGCGCAAGTAACTGACA-TTT?A-AAAATTTGGAAGT  
AATAAAATTAGTTGCTGATTGTATTGAAAAAATA-----TTT-----AGTATCA  
-----ACTC-----GATCA-----TT  
TAATTATTGAGTAAATTTATTATCTTGAACCTTATTACTTATATATATATATATATATAT--AAGTATATAAAATAAAAAAA-  
TTAAAAATTGTAACAAA-TAAATAT-----TTCTTATA-----GT  
ATAGAAAGATTCTAAAATTATAAAGTGATTAAAATAAAAAAAAATTCTTG-----TTCACCTAAAAAAAAGAA  
ATTAGGCAATATTTTATTTTTTGTATTCTTTAATACGTTTTTAATTAAATTTTATTTTATTAATTAGTTTAAACATTCA  
AAAGATTATTAGGTCAATGCTTAGAAAAATAAAAAATAATTTACTAAAAATAATCTGAGTTGCATCAAATATAAAAAATA  
ATATACAATGATACTGTTTTGTTATAGGAAAA-TCAGTTTATCTAAAAATAGACAAAATTAAATACCAAAGAAGTTTTT  
TTATAAGATT---AAAAGAAAAAACTTATTTGTCGAGCAGACCTCATCCTTGCAAGAATTATCAATTGAG-AAAATTTTT  
AAAAAAAAAAAAAAT?AAAATATATA?T???AAAATAAAAAAAAATAAAAAATAA-CTTAAA---TAATTTGAGCTTTAGT  
AGAAAACTTACTAAATGCTAGCTTTTTCAGATTTCAGGGAACTTAGGTTGAAAAAGTATAAGCAATCCTGAGCCAAATTT  
TATTCCTTTAAAAATAAGATAGGTGCAGAGACTCAATGGAAGCTATCCTAACGAATAATATTTTAAAGATTTTTTTT-AATTA  
AATAATTAATTAATAGAAATAAATTTAACTAAAAATTTTATCTTTTATATATTAAGCGAGGATAAAGATAGAGTCCAATTT  
TACATGTTACTTTTAGCAACAATTTAAATTGTAGTAAAAAGAAAATCCGTTGGCTTTATTGACCGTGAGGGTTCAAGTCC  
CTCTACCCCCA-----AAAGT-----CTAA----CCTTTC-----TTTTTATTGACATAAGCT  
CCTAGTTTATGTTACGATAGCCGAAACAAAACAA-TAAATAAAAAATTTAAATA

>P626

AAATCGTGGTGCCTTGCACCTCGAATTGTAGTCTGGAGAAGTGTCTCTGCAACGGACCAGACCCAAGTTCACCTGGAAG  
TGGCGTCAGAGAGGGTGAAAACCCCGTCGAGTCTGGACACTGTTGCAAAACGAGGCACTGTCTGCGAGTCGAGCTGTTTG  
GGAATGCAGCTCTAAGTGGGTGGTAAATTCATCCAAGGCTAAATATTGGCAAGAGACCGATAGCGAACAAGTACCGCGA  
GGGAAAGATGAAAAGGACTTTGAAAAGAGAGTTAAAAAGTGCTTGAAATTGCTGGGAGGGAAGCGAATGGAAGCTGCGGG  
TGTGCCCTGGTTGGATGTGGAACGGTTTAGGCTGGTCCGCCGCTCAACGCGGGGCACTGGTCAGCGTGGGCCATCGCGGC  
GGGACAAGAGCAGGATGTAGTTTCTTGCCATGCCGTTGTGGTGGCCGAGGAACGAAGCATGCG-CCACTTGTGG-CGTG  
GTA--TTTATACCAACTGCATGCTCGGGACGCTGGCGTATTGAGCTCTTCATCCGACCCGTCTTGAAACACGGACCAAGG  
AGTCTAACATGTATGCGAGCCGGTGGGCGGCAAACCCATTGAGGCGCAAGTAACTGACA-TTT?A-AAAATTTGGAAGT  
AATAAAATTAGTTGCTGATTGTATTGAAAAAATA-----TTT-----AGTATCA  
-----ACTC-----GATCA-----TT  
TAATTATTGAGTAAATTTATTATCTTGAACCTTATTACTTATATATATATATATATATAT--AAGTATATAAAATAAAAAAA-  
TTAAAAATTGTAACAAA-TAAATAT-----TTCTTATA-----GT  
ATAGAAAGATTCTAAAATTATAAAGTGATTAAAATAAAAAAAAATTCTTG-----TTCACCTAAAAAAAAGAA  
ATTAGGCAATATTTTATTTTTTGTATTCTTTAATACGTTTTTAATTAAATTTTATTTTATTAATTAGTTTAAACATTCA  
AAAGATTATTAGGTCAATGCTTAGAAAAATAAAAAATAATTTACTAAAAATAATCTGAGTTGCATCAAATATAAAAAATA  
ATATACAATGATACTGTTTTGTTATAGGAAAA-TCAGTTTATCTAAAAATAGACAAAATTAAATACCAAAGAAGTTTTT  
TTATAAGATT---AAAAGAAAAAACTTATTTGTCGAGCAGACCTCATCCTTGCAAGAATTATCAATTGAG-AAAATTTTT  
AAAAAAAAAAAAAAT?AAAATATATA?T???AAAATAAAAAAAAATAAAAAATAA-CTTAAA---TAATTTGAGCTTTAGT  
AGAAAACTTACTAAATGCTAGCTTTTTCAGATTTCAGGGAACTTAGGTTGAAAAAGTATAAGCAATCCTGAGCCAAATTT  
TATTCCTTTAAAAATAAGATAGGTGCAGAGACTCAATGGAAGCTATCCTAACGAATAATATTTTAAAGATTTTTTTT-AATTA  
AATAATTAATTAATAGAAATAAATTTAACTAAAAATTTTATCTTTTATATATTAAGCGAGGATAAAGATAGAGTCCAATTT  
TACATGTTACTTTTAGCAACAATTTAAATTGTAGTAAAAAGAAAATCCGTTGGCTTTATTGACCGTGAGGGTTCAAGTCC  
CTCTACCCCCA-----AAAGT-----CTAA----CCTTTC-----TTTTTATTGACATAAGCT  
CCTAGTTTATGTTACGATAGCCGAAACAAAACAA-TAAATAAAAAATTTAAATA

>P627

AAATCGTGGTGCCTTGCACCTCGAATTGTAGTCTGGAGAAGTGTCTCTGCAACGGACCAGACCCAAGTTCACCTGGAAG  
TGGCGTCAGAGAGGGTGAAAACCCCGTCGAGTCTGGACACTGTTGCAAAACGAGGCACTGTCTGCGAGTCGAGCTGTTTG  
GGAATGCAGCTCTAAGTGGGTGGTAAATTCATCCAAGGCTAAATATTGGCAAGAGACCGATAGCGAACAAGTACCGCGA  
GGGAAAGATGAAAAGGACTTTGAAAAGAGAGTTAAAAAGTGCTTGAAATTGCTGGGAGGGAAGCGAATGGAAGCTGCGGG  
TGTGCCCTGGTTGGATGTGGAACGGTTTAGGCTGGTCCGCCGCTCAACGCGGGGCACTGGTCAGCGTGGGCCATCGCGGC  
GGGACAAGAGCAGGATGTAGTTTCTTGCCATGCCGTTGTGGTGGCCGAGGAACGAAGCATGCG-CCACTTGTGG-CGTG  
GTA--TTTATACCAACTGCATGCTCGGGACGCTGGCGTATTGAGCTCTTCATCCGACCCGTCTTGAAACACGGACCAAGG  
AGTCTAACATGTATGCGAGCCGGTGGGCGGCAAACCCATTGAGGCGCAAGTAACTGACA-TTT?A-AAAATTTGGAAGT  
AATAAAATTAGTTGCTGATTGTATTGAAAAAATA-----TTT-----AGTATCA  
-----ACTC-----GATCA-----TT  
TAATTATTGAGTAAATTTATTATCTTGAACCTTATTACTTATATATATATATATATATAT--AAGTATATAAAATAAAAAAA-  
TTAAAAATTGTAACAAA-TAAATAT-----TTCTTATA-----GT  
ATAGAAAGATTCTAAAATTATAAAGTGATTAAAATAAAAAAAAATTCTTG-----TTCACCTAAAAAAAAGAA  
ATTAGGCAATATTTTATTTTTTGTATTCTTTAATACGTTTTTAATTAAATTTTATTTTATTAATTAGTTTAAACATTCA

AAAGATTATTAGGTCAATGCTTAGAAAAATAAAAAATAATTTACTAAAAATAATCTGAGTTGCATCAAATATAAAAAATA  
ATATACAATGATACTGTTTTGTTATAGGAAAA-TCAGTTTATCTAAAAATAGACAAAATTAAATACCAAAGAAGTTTTT  
TTATAAGATT---AAAAGAAAAAACTTATTTGTCGAGCAGACCTCATCCTTGCAAGAATTATCAATTGAG-AAAATTTTT  
AAAAAAAAAAAAAAT?AAAATATATA?T??AAAAATAAAAAAAAATAAAAAATAA-CTTAAA---TAATTTGAGCTTTAGT  
AGAAAACTTACTAAATGCTAGCTTTTCAAGATTCAGGGAACTTAGGTTGAAAAAGTATAAGCAATCCTGAGCCAAATTT  
TATTCCTTTAAAAATAAGATAGGTGCAGAGACTCAATGGAAGCTATCCTAACGAATAATATTTTAAGATTTTTTTT-AATTA  
AATAATTAATTAATAGAAATAAATTTAACTAAAATTTTATCTTTTATATATTAAGCGAGGATAAAGATAGAGTCCAATTT  
TACATGTTACTTTTAGCAACAATTTAAATTGTAGTAAAAAGAAAATCCGTTGGCTTTATTGACCGTGAGGGTTCAAGTCC  
CTCTACCCCCA-----AAAGT-----CTAA----CCTTTC-----TTTTATTGACATAAGCT  
CCTAGTTTATGTTACGATAGCCGAAACAAAACAA-TAAATAAAAAATTTAAATA

>P628

AAATCGTGGTGCCTTGACCTCGAATTGTAGTCTGGAGAAGTGTCTCTGCAACGGACCAGACCCAAGTTCCTGGAAG  
TGGCGTCAGAGAGGGTGAAAACCCCGTCGAGTCTGGACACTGTTGCAAAACGAGGCACTGTCTGCGAGTCGAGCTGTTT  
GGAATGCAGCTCTAAGTGGGTGGTAAATTCATCCAAGGCTAAATATTGGCAAGAGACCGATAGCGAACAAGTACCGCGA  
GGGAAAGATGAAAAGGACTTTGAAAAGAGAGTTAAAAAGTGCTTGAAATTGCTGGGAGGGGAAGCGAATGGAAGCTGCGGG  
TGTGCCCTGGTTGGATGTGGAACGGTTTAGGCTGGTCCGCCGCTCAACGCGGGGCACTGGTCAGCGTGGGCCATCGCGGC  
GGGACAAGAGCAGGATGTAGTTTCTTGCCATGCGGTTGTGGTGGCCGAGGAACGAAGCATGCG-CCACTTGTGG-CGTG  
GTA--TTTATACCAACTGCATGCTCGGGACGCTGGCGTATTGAGCTCTTCATCCGACCCGCTCTTGAAACACGGACCAAGG  
AGTCTAACATGTATGCGAGCCGGTGGGCGGCAAACCCATTGAGGCGCAAGTAACTGACA-TTT?A-AAAATTTGGAAGT  
AATAAAATTAGTTGCTGATTGTATTGAAAAAATA-----TTT-----AGTATCA  
-----ACTC-----GATCA-----TT  
TAATTATTGAGTAAAAATTATTATCTTGAACCTTATTACTTATATATATATATATATATAT--AAGTATATAAAATAAAAAA-  
TTAAAAATTGTAACAAA-TAAATAT-----TTCTTATA-----GT  
ATAGAAAGATTCTAAAATTATAAAGTGATTAAAAATAAAAAAAAATTCCTG-----TTCACCTAAAAAAAAGAA  
ATTAGGCAATATTTTATTTTTTGTATTCTTTAATACGTTTTTAATTAATTTTATTTTATTAATTAGTTTAACATTCA  
AAAGATTATTAGGTCAATGCTTAGAAAAATAAAAAATAATTTACTAAAAATAATCTGAGTTGCATCAAATATAAAAAATA  
ATATACAATGATACTGTTTTGTTATAGGAAAA-TCAGTTTATCTAAAAATAGACAAAATTAAATACCAAAGAAGTTTTT  
TTATAAGATT---AAAAGAAAAAACTTATTTGTCGAGCAGACCTCATCCTTGCAAGAATTATCAATTGAG-AAAATTTTT  
AAAAAAAAAAAAAAT?AAAATATATA?T??AAAAATAAAAAAAAATAAAAAATAA-CTTAAA---TAATTTGAGCTTTAGT  
AGAAAACTTACTAAATGCTAGCTTTTCAAGATTCAGGGAACTTAGGTTGAAAAAGTATAAGCAATCCTGAGCCAAATTT  
TATTCCTTTAAAAATAAGATAGGTGCAGAGACTCAATGGAAGCTATCCTAACGAATAATATTTTAAGATTTTTTTT-AATTA  
AATAATTAATTAATAGAAATAAATTTAACTAAAATTTTATCTTTTATATATTAAGCGAGGATAAAGATAGAGTCCAATTT  
TACATGTTACTTTTAGCAACAATTTAAATTGTAGTAAAAAGAAAATCCGTTGGCTTTATTGACCGTGAGGGTTCAAGTCC  
CTCTACCCCCA-----AAAGT-----CTAA----CCTTTC-----TTTTATTGACATAAGCT  
CCTAGTTTATGTTACGATAGCCGAAACAAAACAA-TAAATAAAAAATTTAAATA

>P629

AAATCGTGGTGCCTTGACCTCGAATTGTAGTCTGGAGAAGTGTCTCTGCAACGGACCAGACCCAAGTTCCTGGAAG  
TGGCGTCAGAGAGGGTGAAAACCCCGTCGAGTCTGGACACTGTTGCAAAACGAGGCACTGTCTGCGAGTCGAGCTGTTT  
GGAATGCAGCTCTAAGTGGGTGGTAAATTCATCCAAGGCTAAATATTGGCAAGAGACCGATAGCGAACAAGTACCGCGA  
GGGAAAGATGAAAAGGACTTTGAAAAGAGAGTTAAAAAGTGCTTGAAATTGCTGGGAGGGGAAGCGAATGGAAGCTGCGGG  
TGTGCCCTGGTTGGATGTGGAACGGTTTAGGCTGGTCCGCCGCTCAACGCGGGGCACTGGTCAGCGTGGGCCATCGCGGC  
GGGACAAGAGCAGGATGTAGTTTCTTGCCATGCGGTTGTGGTGGCCGAGGAACGAAGCATGCG-CCACTTGTGG-CGTG  
GTA--TTTATACCAACTGCATGCTCGGGACGCTGGCGTATTGAGCTCTTCATCCGACCCGCTCTTGAAACACGGACCAAGG  
AGTCTAACATGTATGCGAGCCGGTGGGCGGCAAACCCATTGAGGCGCAAGTAACTGACA-TTT?A-AAAATTTGGAAGT  
AATAAAATTAGTTGCTGATTGTATTGAAAAAATA-----TTT-----AGTATCA  
-----ACTC-----GATCA-----TT  
TAATTATTGAGTAAAAATTATTATCTTGAACCTTATTACTTATATATATATATATATATATAAAGTATATAAAATAAAAAA-  
TTAAAAATTGTAACAAA-TAAATAT-----TTCTTATA-----GT  
ATAGAAAGATTCTAAAATTATAAAGTGATTAAAAATAAAAAAAAATTCCTG-----TTCACCTAAAAAAAAGAA  
ATTAGGCAATATTTTATTTTTTGTATTCTTTAATACGTTTTTAATTAATTTTATTTTATTAATTAGTTTAACATTCA  
AAAGATTATTAGGTCAATGCTTAGAAAAATAAAAAATAATTTACTAAAAATAATCTGAGTTGCATCAAATATAAAAAATA  
ATATACAATGATACTGTTTTGTTATAGGAAAA-TCAGTTTATCTAAAAATAGACAAAATTAAATACCAAAGAAGTTTTT  
TTATAAGATT---AAAAGAAAAAACTTATTTGTCGAGCAGACCTCATCCTTGCAAGAATTATCAATTGAG-AAAATTTTT  
AAAAAAAAAAAAAATATATATA?T??AAAAATAAAAAAAAATAAAAAATAA-CTTAAA---TAATTTGAGCTTTAGT  
AGAAAACTTACTAAATGCTAGCTTTTCAAGATTCAGGGAACTTAGGTTGAAAAAGTATAAGCAATCCTGAGCCAAATTT  
TATTCCTTTAAAAATAAGATAGGTGCAGAGACTCAATGGAAGCTATCCTAACGAATAATATTTTAAGATTTTTTTT-AATTA  
AATAATTAATTAATAGAAATAAATTTAACTAAAATTTTATCTTTTATATATTAAGCGAGGATAAAGATAGAGTCCAATTT  
TACATGTTACTTTTAGCAACAATTTAAATTGTAGTAAAAAGAAAATCCGTTGGCTTTATTGACCGTGAGGGTTCAAGTCC

>P630

>P631

>P632

AAATCGTGGTGCCTTGCACCTCGAATTGTAGTCTGGAGAAGTGTCTCTGCAACGGACCAGACCCAAGTTCCTGGAAG  
TGGCGTCAGAGAGGGTGAAAACCCCGTCGAGTCTGGACACTGTTGCAAAACGAGGCACTGTCTGCGAGTCGAGCTGTTTG  
GGAATGCAGCTCTAAGTGGGTGGTAAATTCCATCCAAGGCTAAATATTGGCAAGAGACCGATAGCGAAACAAGTACCGCGA  
GGGAAAGATGAAAAGGACTTTGAAAAGAGAGTTAAAAAGTGCTTGAAATTGCTGGGAGGGAAGCGAATGGAAGCTGCGGG  
TGTGCCCTGGTTGGATGTGGAACGGTTTTAGGCTGGTCCGCCGCTCAACGCGGGGCACTGGTCAGCGTGGGCCATCGCGGC

GGGACAAGAGCAGGATGTAGTTTCTTGCCTATGCCGTTGTGGTGGCCGAGGAACGAAGCATGCG-CCACTTGTGG-CGTG  
GTA--TTTATACCAACTGCATGCTCGGGACGCTGGCGTATTGAGCTCTTCATCCGACCCGTCTTGAAACACGGACCAAGG  
AGTCTAACATGTATGCGAGCCGGTGGGCGGCAAACCCATTGAGGCGCAAGTAACTGACA-TTT?A-AAAATTTGGAAGT  
AATAAAATTAGTTGCTGATTGTATTGAAAAAATA-----TTT-----AGTATCA  
-----ACTC-----GATCA-----TT  
TAATTATTGAGTAAATTTATTATCTTGAACCTTATTACTTATATATATATATATATATAAGTATATAAAATAAAAAAA-  
TTAAAAATTGTAACAAA-TAAATAT-----TTCTTATA-----GT  
ATAGAAAGATTCTAAAATTATAAAGTGATTAAAATAAAAAAAAATTCTTG-----TTCACCTAAAAAAAAGAA  
ATTAGGCAATATTTTATTTTTTGTATTCTTTAATACGTTTTTAATTAAATTTTATTTTATTAATTAGTTTAAACATTCA  
AAAGATTATTAGGTCAATGCTTAGAAAAATAAAAAATAATTTACTAAAAATAATCTGAGTTGCATCAAATATAAAAAATA  
ATATACAATGATACTGTTTTGTTATAGGAAAA-TCAGTTTATCTAAAAATAGACAAAATTAAATACCAAAGAAGTTTTT  
TTATAAGATT---AAAAGAAAAAACTTATTTGTGCGAGCAGACCTCATCCTTGCAAGAATTATCAATTGAG-AAAATTTTT  
AAAAAAAAAAAAAAAAAATATATA?T??T?AAAATAAAAAAAAAAATAAAATAAA-CTTAAA---TAATTTGAGCTTTAGT  
AGAAAACTTACTAAATGCTAGCTTTTCTAGATTCTAGGGAACTTAGGTTGAAAAAGTATAAGCAATCCTGAGCCAAATTT  
TATTCCTTTAAAAATAAGATAGGTGCAGAGACTCAATGGAAGCTATCCTAACGAATAATATTTTAAAGATTTTTTT-AATTA  
AATAATTAATTAATAGAAATAAATTTAACTAAAATTTTATCTTTTATATATTAAGCGAGGATAAAGATAGAGTCCAATTT  
TACATGTTACTTTTAGCAACAATTTAAATTGTAGTAAAAAGAAAATCCGTTGGCTTTATTGACCGTGAGGGTTCAAGTCC  
CTCTACCCCCA-----AAAGT-----CTAA-----CCTTTC-----TTTTTATTGACATAAGCT  
CCTAGTTTATGTTACGATAGCCGAAACAAAACAA-TAAATAAAAAATTTAAATA

>P633

AAATCGTGGTGCCTTGCACCTCGAATTGTAGTCTGGAGAAGTGTCTCTGCAACGGACCAGACCCAAGTTCACTGGAAAG  
TGGCGTCAGAGAGGGTGAAAACCCCGTCGAGTCTGGACACTGTTGCAAAACGAGGCACTGTCTGCGAGTCGAGCTGTTTG  
GGAATGCAGCTCTAAGTGGGTGGTAAATTCATCCAAGGCTAAATATTGGCAAGAGACCGATAGCGAACAAGTACCGCGA  
GGGAAAGATGAAAAGGACTTTGAAAAGAGAGTTAAAAAGTGCTTGAAATTGCTGGGAGGGAAGCGAATGGAAGCTGCGGG  
TGTGCCCTGGTTGGATGTGGAACGGTTTAGGCTGGTCCGCCGCTCAACGCGGGGCACTGGTCAGCGTGCGGCCATCGCGGC  
GGGACAAGAGCAGGATGTAGTTTCTTGCCTATGCCGTTGTGGTGGCCGAGGAACGAAGCATGCG-CCACTTGTGG-CGTG  
GTA--TTTATACCAACTGCATGCTCGGGACGCTGGCGTATTGAGCTCTTCATCCGACCCGTCTTGAAACACGGACCAAGG  
AGTCTAACATGTATGCGAGCCGGTGGGCGGCAAACCCATTGAGGCGCAAGTAACTGACA-TTT?A-AAAATTTGGAAGT  
AATAAAATTAGTTGCTGATTGTATTGAAAAAATA-----TTT-----AGTATCA  
-----ACTC-----GATCA-----TT  
TAATTATTGAGTAAATTTATTATCTTGAACCTTATTACTTATATATATATATATATATAT--AAGTATATAAAATAAAAAAA-  
TTAAAAATTGTAACAAA-TAAATAT-----TTCTTATA-----GT  
ATAGAAAGATTCTAAAATTATAAAGTGATTAAAATAAAAAAAAATTCTTG-----TTCACCTAAAAAAAAGAA  
ATTAGGCAATATTTTATTTTTTGTATTCTTTAATACGTTTTTAATTAAATTTTATTTTATTAATTAGTTTAAACATTCA  
AAAGATTATTAGGTCAATGCTTAGAAAAATAAAAAATAATTTACTAAAAATAATCTGAGTTGCATCAAATATAAAAAATA  
ATATACAATGATACTGTTTTGTTATAGGAAAA-TCAGTTTATCTAAAAATAGACAAAATTAAATACCAAAGAAGTTTTT  
TTATAAGATT---AAAAGAAAAAACTTATTTGTGCGAGCAGACCTCATCCTTGCAAGAATTATCAATTGAG-AAAATTTTT  
AAAAAAAAAAAAAAT?AAAATATATA?T??T?AAAATAAAAAAAAAAATAAAATAAA-CTTAAA---TAATTTGAGCTTTAGT  
AGAAAACTTACTAAATGCTAGCTTTTCTAGATTCTAGGGAACTTAGGTTGAAAAAGTATAAGCAATCCTGAGCCAAATTT  
TATTCCTTTAAAAATAAGATAGGTGCAGAGACTCAATGGAAGCTATCCTAACGAATAATATTTTAAAGATTTTTTT-AATTA  
AATAATTAATTAATAGAAATAAATTTAACTAAAATTTTATCTTTTATATATTAAGCGAGGATAAAGATAGAGTCCAATTT  
TACATGTTACTTTTAGCAACAATTTAAATTGTAGTAAAAAGAAAATCCGTTGGCTTTATTGACCGTGAGGGTTCAAGTCC  
CTCTACCCCCA-----AAAGT-----CTAA-----CCTTTC-----TTTTTATTGACATAAGCT  
CCTAGTTTATGTTACGATAGCCGAAACAAAACAA-TAAATAAAAAATTTAAATA

>P634

AAATCGTGGTGCCTTGCACCTCGAATTGTAGTCTGGAGAAGTGTCTCTGCAACGGACCAGACCCAAGTTCACTGGAAAG  
TGGCGTCAGAGAGGGTGAAAACCCCGTCGAGTCTGGACACTGTTGCAAAACGAGGCACTGTCTGCGAGTCGAGCTGTTTG  
GGAATGCAGCTCTAAGTGGGTGGTAAATTCATCCAAGGCTAAATATTGGCAAGAGACCGATAGCGAACAAGTACCGCGA  
GGGAAAGATGAAAAGGACTTTGAAAAGAGAGTTAAAAAGTGCTTGAAATTGCTGGGAGGGAAGCGAATGGAAGCTGCGGG  
TGTGCCCTGGTTGGATGTGGAACGGTTTAGGCTGGTCCGCCGCTCAACGCGGGGCACTGGTCAGCGTGCGGCCATCGCGGC  
GGGACAAGAGCAGGATGTAGTTTCTTGCCTATGCCGTTGTGGTGGCCGAGGAACGAAGCATGCG-CCACTTGTGG-CGTG  
GTA--TTTATACCAACTGCATGCTCGGGACGCTGGCGTATTGAGCTCTTCATCCGACCCGTCTTGAAACACGGACCAAGG  
AGTCTAACATGTATGCGAGCCGGTGGGCGGCAAACCCATTGAGGCGCAAGTAACTGACA-TTT?A-AAAATTTGGAAGT  
AATAAAATTAGTTGCTGATTGTATTGAAAAAATA-----TTT-----AGTATCA  
-----ACTC-----GATCA-----TT  
TAATTATTGAGTAAATTTATTATCTTGAACCTTATTACTTATATATATATATATATATATAAGTATATAAAATAAAAAAA-  
TTAAAAATTGTAACAAA-TAAATAT-----TTCTTATA-----GT  
ATAGAAAGATTCTAAAATTATAAAGTGATTAAAATAAAAAAAAATTCTTG-----TTCACCTAAAAAAAAGAA

ATTAGGCAATATTTTATTTTTTGTATTCTTTAATACGTTTTTAATTAAATTTTATTTTTATTAATTAGTTTAAACATTCA  
AAAGATTATTAGGTCAATGCTTAGAAAAATAAAAAATAATTTACTAAAAATAATCTGAGTTGCATCAAATATAAAAAATA  
ATATACAATGATACTGTTTTGTTATAGGAAAA-TCAGTTTATCTAAAAAATAGACAAAATTAAATACCAAAGAAGTTTTT  
TTATAAGATT---AAAAGAAAAAACTTATTTGTCGAGCAGACCTCATCCTTGCAAGAATTATCAATTGAG-AAAATTTTT  
AAAAAAAAAAAAAAAAAATATATA?T??TAAAATAAAAAAAAAAATAAAATAAA-CTTAAA---TAATTTGAGCTTTAGT  
AGAAAACTTACTAAATGCTAGCTTTTTCAGATTCAGGGAACTTAGGTTGAAAAAGTATAAGCAATCCTGAGCCAAATTT  
TATTCCTTTAAAAATAAGATAGGTGCAGAGACTCAATGGAAGCTATCCTAACGAATAATATTTTAAGATTTTTTTT-AATTA  
AATAATTAATTAATAGAAATAAATTTAACTAAAATTTTTATCTTTTATATATTAAGCGAGGATAAAGATAGAGTCCAATTT  
TACATGTTACTTTTAGCAACAATTTAAATTGTAGTAAAAAGAAAATCCGTTGGCTTTATTGACCGTGAGGGTTCAAGTCC  
CTCTACCCCCA-----AAAGT-----CTAA----CCTTTC-----TTTTATTGACATAAGCT  
CCTAGTTTATGTTACGATAGCCGAAACAAAACAA-TAAATAAAAAATTTAAATA

>P635

AAATCGTGGTGCCTTGACCTCGAATTGTAGTCTGGAGAAGTGTCTCTGCAACGGACCAGACCCAAGTTCCTGGAAG  
TGGCGTCAGAGAGGGTGAAAACCCCGTCGAGTCTGGACACTGTTGCAAAACGAGGCACTGTCTGCGAGTCGAGCTGTTTG  
GGAATGCAGCTCTAAGTGGGTGGTAAATTCATCCAAGGCTAAATATTGGCAAGAGACCGATAGCGAACAAGTACCGCGA  
GGGAAAGATGAAAAGGACTTTGAAAAGAGAGTTAAAAAGTGCTTGAAATTGCTGGGAGGGAAGCGAATGGAAGCTGCGGG  
TGTGCCCTGGTTGGATGTGGAACGGTTTAGGCTGGTCCGCCGCTCAACGCGGGGCACTGGTCAGCGTGGGCCATCGCGGC  
GGGACAAGAGCAGGATGTAGTTTCTTGCCATGCCGTTGTGGTGGCCGAGGAACGAAGCATGCG-CCACTTGTGG-CGTG  
GTA--TTTATACCAACTGCATGCTCGGGACGCTGGCGTATTGAGCTCTTCATCCGACCCGCTCTTGAAACACGGACCAAGG  
AGTCTAACATGTATGCGAGCCGGTGGGCGGCAAACCCATTGAGGCGCAAGTAACTGACA-TTT?A-AAAATTTGGAAGT  
AATAAAATTAGTTGCTGATTGTATTGAAAAAATA-----TTT-----AGTATCA  
-----ACTC-----GATCA-----TT  
TAATTATTGAGTAAAAATTATTATCTTGAACCTTATTACTTATATATATATATATATAT--AAGTATATAAAATAAAAAA-  
TTAAAAATTGTAACAAA-TAAATAT-----TTCTTATA-----GT  
ATAGAAAGATTCTAAAATTATAAAGTGATTAAAATAAAAAAAATTTCTTG-----TTCACTTAAAAAAAAGAA  
ATTAGGCAATATTTTATTTTTTGTATTCTTTAATACGTTTTTAATTAAATTTTATTTTTATTAATTAGTTTAAACATTCA  
AAAGATTATTAGGTCAATGCTTAGAAAAATAAAAAATAATTTACTAAAAATAATCTGAGTTGCATCAAATATAAAAAATA  
ATATACAATGATACTGTTTTGTTATAGGAAAA-TCAGTTTATCTAAAAAATAGACAAAATTAAATACCAAAGAAGTTTTT  
TTATAAGATT---AAAAGAAAAAACTTATTTGTCGAGCAGACCTCATCCTTGCAAGAATTATCAATTGAG-AAAATTTTT  
AAAAAAAAAAAAAAT?AAAATATATA?T??TAAAATAAAAAAAAAAATAAAATAAA-CTTAAA---TAATTTGAGCTTTAGT  
AGAAAACTTACTAAATGCTAGCTTTTTCAGATTCAGGGAACTTAGGTTGAAAAAGTATAAGCAATCCTGAGCCAAATTT  
TATTCCTTTAAAAATAAGATAGGTGCAGAGACTCAATGGAAGCTATCCTAACGAATAATATTTTAAGATTTTTTTT-AATTA  
AATAATTAATTAATAGAAATAAATTTAACTAAAATTTTTATCTTTTATATATTAAGCGAGGATAAAGATAGAGTCCAATTT  
TACATGTTACTTTTAGCAACAATTTAAATTGTAGTAAAAAGAAAATCCGTTGGCTTTATTGACCGTGAGGGTTCAAGTCC  
CTCTACCCCCA-----AAAGT-----CTAA----CCTTTC-----TTTTATTGACATAAGCT  
CCTAGTTTATGTTACGATAGCCGAAACAAAACAA-TAAATAAAAAATTTAAATA

>P636

AAATCGTGGTGCCTTGACCTCGAATTGTAGTCTGGAGAAGTGTCTCTGCAACGGACCAGACCCAAGTTCCTGGAAG  
TGGCGTCAGAGAGGGTGAAAACCCCGTCGAGTCTGGACACTGTTGCAAAACGAGGCACTGTCTGCGAGTCGAGCTGTTTG  
GGAATGCAGCTCTAAGTGGGTGGTAAATTCATCCAAGGCTAAATATTGGCAAGAGACCGATAGCGAACAAGTACCGCGA  
GGGAAAGATGAAAAGGACTTTGAAAAGAGAGTTAAAAAGTGCTTGAAATTGCTGGGAGGGAAGCGAATGGAAGCTGCGGG  
TGTGCCCTGGTTGGATGTGGAACGGTTTAGGCTGGTCCGCCGCTCAACGCGGGGCACTGGTCAGCGTGGGCCATCGCGGC  
GGGACAAGAGCAGGATGTAGTTTCTTGCCATGCCGTTGTGGTGGCCGAGGAACGAAGCATGCG-CCACTTGTGG-CGTG  
GTA--TTTATACCAACTGCATGCTCGGGACGCTGGCGTATTGAGCTCTTCATCCGACCCGCTCTTGAAACACGGACCAAGG  
AGTCTAACATGTATGCGAGCCGGTGGGCGGCAAACCCATTGAGGCGCAAGTAACTGACA-TTT?A-AAAATTTGGAAGT  
AATAAAATTAGTTGCTGATTGTATTGAAAAAATA-----TTT-----AGTATCA  
-----ACTC-----GATCA-----TT  
TAATTATTGAGTAAAAATTATTATCTTGAACCTTATTACTTATATATATATATATATATAT--AAGTATATAAAATAAAAAA-  
TTAAAAATTGTAACAAA-TAAATAT-----TTCTTATA-----GT  
ATAGAAAGATTCTAAAATTATAAAGTGATTAAAATAAAAAAAATTTCTTG-----TTCACTTAAAAAAAAGAA  
ATTAGGCAATATTTTATTTTTTGTATTCTTTAATACGTTTTTAATTAAATTTTATTTTTATTAATTAGTTTAAACATTCA  
AAAGATTATTAGGTCAATGCTTAGAAAAATAAAAAATAATTTACTAAAAATAATCTGAGTTGCATCAAATATAAAAAATA  
ATATACAATGATACTGTTTTGTTATAGGAAAA-TCAGTTTATCTAAAAAATAGACAAAATTAAATACCAAAGAAGTTTTT  
TTATAAGATT---AAAAGAAAAAACTTATTTGTCGAGCAGACCTCATCCTTGCAAGAATTATCAATTGAG-AAAATTTTT  
AAAAAAAAAAAAAAT?AAAATATATA?T??TAAAATAAAAAAAAAAATAAAATAAA-CTTAAA---TAATTTGAGCTTTAGT  
AGAAAACTTACTAAATGCTAGCTTTTTCAGATTCAGGGAACTTAGGTTGAAAAAGTATAAGCAATCCTGAGCCAAATTT  
TATTCCTTTAAAAATAAGATAGGTGCAGAGACTCAATGGAAGCTATCCTAACGAATAATATTTTAAGATTTTTTTT-AATTA  
AATAATTAATTAATAGAAATAAATTTAACTAAAATTTTTATCTTTTATATATTAAGCGAGGATAAAGATAGAGTCCAATTT



TACATGTTACTTTTAGCAACAATTTAAATTGTAGTAAAAAGAAAATCCGTTGGCTTTATTGACCGTGAGGGTTCAAGTCC  
CTCTACCCCCA-----AAAGT-----CTAA----CCTTTC-----TTTTATTGACATAAGCT  
CCTAGTTTATGTTACGATAGCCGAAACAAACAA-TAAATAAAAAATTTAAATA

>P637

AAATCGTGGTGCCTTGCACCTCGAATTGTAGTCTGGAGAAGTGTCTCTGCAACGGACCAGACCCAAGTTCACCTGGAAG  
TGGCGTCAGAGAGGGTGAAAACCCCGTCGAGTCTGGACACTGTTGCAAAACGAGGCACTGTCTGCGAGTCGAGCTGTTTG  
GGAATGCAGCTCTAAGTGGGTGGTAAATTCCATCCAAGGCTAAATATTGGCAAGAGACCGATAGCGAACAAGTACCGCGA  
GGGAAAGATGAAAAGGACTTTGAAAAGAGAGTTAAAAAGTGCTTGAAATTGCTGGGAGGGAAGCGAATGGAAGCTGCGGG  
TGTGCCCTGGTTGGATGTGGAACGGTTTAGGCTGGTCCGCCGCTCAACGCGGGGCACTGGTCAGCGTGGGCCATCGCGGC  
GGGACAAGAGCAGGATGTAGTTTCTTGCCATGCCGTTGTGGTGGCCGAGGAACGAAGCATGCG-CCACTTGTGG-CGTG  
GTA--TTTATACCAACTGCATGCTCGGGACGCTGGCGTATTGAGCTCTTCATCCGACCCGCTCTTGAAACACGGACCAAGG  
AGTCTAACATGTATGCGAGCCGGTGGGCGGCAAACCCATTGAGGCGCAAGTAAACTGACA-TTT?A-AAAATTTGGAAGT  
AATAAAATTAGTTGCTGATTGTATTGAAAAAATA-----TTT-----AGTATCA  
-----ACTC-----GATCA-----TT  
TAATTATTGAGTAAAAATTATTATCTTGAACCTTATTACTTATATATATATATATATATAT--AAGTATATAAAATAAAAAA-  
TTAAAAATTGTAACAA-TAAATAT-----TTCTTATA-----GT  
ATAGAAAGATTCTAAAATTATAAAGTGATTAAAAATAAAAAAAATTTCTTG-----TTCACTTAAAAAAAAGAA  
ATTAGGCAATATTTTATTTTTTGTATTCTTTAATACGTTTTTAATTAAATTTTATTTTATTAATTAGTTTAAACATTCA  
AAAGATTATTAGGTCAATGCTTAGAAAAATAAAAAATAATTTACTAAAAATAATCTGAGTTGCATCAAATATAAAAAATA  
ATATACAATGATACTGTTTTGTTATAGGAAAA-TCAGTTTATCTAAAAATAGACAAAATTAAATACCAAAGAAGTTTTT  
TTATAAGATT---AAAAGAAAAAACTTATTTGTCGAGCAGACCTCATCCTTGCAAGAATTATCAATTGAG-AAAATTTTT  
AAAAAAAAAAAAAT?AAAATATATA?T??AAAAATAAAAAAAATAAAATAAA-CTTAAA---TAATTTGAGCTTTAGT  
AGAAAACTTACTAAATGCTAGCTTTTTCAGATTCAGGGAACTTAGGTTGAAAAAGTATAAGCAATCCTGAGCCAAATTT  
TATTCTTTTAAAAATAAGATAGGTGCAGAGACTCAATGGAAGCTATCCTAACGAATAATATTTTAAGATTTTTTT-AATTA  
AATAATTAATTAATAGAAATAAATTTAACTAAAATTTTATCTTTTATATATTAAGCGAGGATAAAGATAGAGTCCAATTT  
TACATGTTACTTTTAGCAACAATTTAAATTGTAGTAAAAAGAAAATCCGTTGGCTTTATTGACCGTGAGGGTTCAAGTCC  
CTCTACCCCCA-----AAAGT-----CTAA----CCTTTC-----TTTTATTGACATAAGCT  
CCTAGTTTATGTTACGATAGCCGAAACAAACAA-TAAATAAAAAATTTAAATA

>P638

AAATCGTGGTGCCTTGCACCTCGAATTGTAGTCTGGAGAAGTGTCTCTGCAACGGACCAGACCCAAGTTCACCTGGAAG  
TGGCGTCAGAGAGGGTGAAAACCCCGTCGAGTCTGGACACTGTTGCAAAACGAGGCACTGTCTGCGAGTCGAGCTGTTTG  
GGAATGCAGCTCTAAGTGGGTGGTAAATTCCATCCAAGGCTAAATATTGGCAAGAGACCGATAGCGAACAAGTACCGCGA  
GGGAAAGATGAAAAGGACTTTGAAAAGAGAGTTAAAAAGTGCTTGAAATTGCTGGGAGGGAAGCGAATGGAAGCTGCGGG  
TGTGCCCTGGTTGGATGTGGAACGGTTTAGGCTGGTCCGCCGCTCAACGCGGGGCACTGGTCAGCGTGGGCCATCGCGGC  
GGGACAAGAGCAGGATGTAGTTTCTTGCCATGCCGTTGTGGTGGCCGAGGAACGAAGCATGCG-CCACTTGTGG-CGTG  
GTA--TTTATACCAACTGCATGCTCGGGACGCTGGCGTATTGAGCTCTTCATCCGACCCGCTCTTGAAACACGGACCAAGG  
AGTCTAACATGTATGCGAGCCGGTGGGCGGCAAACCCATTGAGGCGCAAGTAAACTGACA-TTT?A-AAAATTTGGAAGT  
AATAAAATTAGTTGCTGATTGTATTGAAAAAATA-----TTT-----AGTATCA  
-----ACTC-----GATCA-----TT  
TAATTATTGAGTAAAAATTATTATCTTGAACCTTATTACTTATATATATATATATATATAT--AAGTATATAAAATAAAAAA-  
TTAAAAATTGTAACAA-TAAATAT-----TTCTTATA-----GT  
ATAGAAAGATTCTAAAATTATAAAGTGATTAAAAATAAAAAAAATTTCTTG-----TTCACTTAAAAAAAAGAA  
ATTAGGCAATATTTTATTTTTTGTATTCTTTAATACGTTTTTAATTAAATTTTATTTTATTAATTAGTTTAAACATTCA  
AAAGATTATTAGGTCAATGCTTAGAAAAATAAAAAATAATTTACTAAAAATAATCTGAGTTGCATCAAATATAAAAAATA  
ATATACAATGATACTGTTTTGTTATAGGAAAA-TCAGTTTATCTAAAAATAGACAAAATTAAATACCAAAGAAGTTTTT  
TTATAAGATT---AAAAGAAAAAACTTATTTGTCGAGCAGACCTCATCCTTGCAAGAATTATCAATTGAG-AAAATTTTT  
AAAAAAAAAAAAAT?AAAATATATA?T??AAAAATAAAAAAAATAAAATAAA-CTTAAA---TAATTTGAGCTTTAGT  
AGAAAACTTACTAAATGCTAGCTTTTTCAGATTCAGGGAACTTAGGTTGAAAAAGTATAAGCAATCCTGAGCCAAATTT  
TATTCTTTTAAAAATAAGATAGGTGCAGAGACTCAATGGAAGCTATCCTAACGAATAATATTTTAAGATTTTTTT-AATTA  
AATAATTAATTAATAGAAATAAATTTAACTAAAATTTTATCTTTTATATATTAAGCGAGGATAAAGATAGAGTCCAATTT  
TACATGTTACTTTTAGCAACAATTTAAATTGTAGTAAAAAGAAAATCCGTTGGCTTTATTGACCGTGAGGGTTCAAGTCC  
CTCTACCCCCA-----AAAGT-----CTAA----CCTTTC-----TTTTATTGACATAAGCT  
CCTAGTTTATGTTACGATAGCCGAAACAAACAA-TAAATAAAAAATTTAAATA

>P639

AAATCGTGGTGCCTTGCACCTCGAATTGTAGTCTGGAGAAGTGTCTCTGCAACGGACCAGACCCAAGTTCACCTGGAAG  
TGGCGTCAGAGAGGGTGAAAACCCCGTCGAGTCTGGACACTGTTGCAAAACGAGGCACTGTCTGCGAGTCGAGCTGTTTG  
GGAATGCAGCTCTAAGTGGGTGGTAAATTCCATCCAAGGCTAAATATTGGCAAGAGACCGATAGCGAACAAGTACCGCGA  
GGGAAAGATGAAAAGGACTTTGAAAAGAGAGTTAAAAAGTGCTTGAAATTGCTGGGAGGGAAGCGAATGGAAGCTGCGGG

TGTGCCCTGGTTGGATGTGGAACGGTTTAGGCTGGTCCGCCGCTCAACGCGGGGCACTGGTCAGCGTGGGCCATCGCGGC  
GGGACAAGAGCAGGATGTAGTTTCTTGCCATGCGGTTGTGGTGGCCGAGGAACGAAGCATGCG-CCACTTGTGG-CGTG  
GTA--TTTATACCAACTGCATGCTCGGGACGCTGGCGTATTGAGCTCTTCATCCGACCCGTCTTGAAACACGGACCAAGG  
AGTCTAACATGTATGCGAGCCGGTGGGCGGCAAACCCATTGAGGCGCAAGTAACTGACA-TTT?A-AAAATTTGGAAGT  
AATAAAATTAGTTGCTGATTGTATTGAAAAAATA-----TTT-----AGTATCA  
-----ACTC-----GATCA-----TT  
TAATTATTGAGTAAATTTATTATCTTGAACCTTATTACTTATATATATATATATATATAT--AAGTATATAAAATAAAAAA-  
TTAAAAATTGTAACAAA-TAAATAT-----TTCTTATA-----GT  
ATAGAAAGATTCTAAAATTATAAAGTGATTAAAATAAAAAAAATTTCTTG-----TTCACCTAAAAAAAGAA  
ATTAGGCAATATTTTATTTTTTGTATTCTTTAATACGTTTTTAATTAATTTTATTTTATTAATTAGTTTAAACATTCA  
AAAGATTATTAGGTCAATGCTTAGAAAAATAAAAAATAATTTACTAAAAATAATCTGAGTTGCATCAAATATAAAAAATA  
ATATACAATGATACTGTTTTGTTATAGGAAAA-TCAGTTTATCTAAAAAATAGACAAAATTAAATACCAAAGAAGTTTTT  
TTATAAGATT---AAAAGAAAAAACTTATTTGTGCGAGCAGACCTCATCCTTGCAAGAATTATCAATTGAG-AAAATTTTT  
AAAAAAAAAAAAAAT?AAAATATATA?T???AAAATAAAAAAAATAAAAAATAA-CTTAAA---TAATTTGAGCTTTAGT  
AGAAAACTTACTAAATGCTAGCTTTTTCAGATTTCAGGGAACTTAGGTTGAAAAAGTATAAGCAATCCTGAGCCAAATTT  
TATTCCTTTAAAAATAAGATAGGTGCAGAGACTCAATGGAAGCTATCCTAACGAATAATATTTTAAAGATTTTTTT-AATTA  
AATAATTAATTAATAGAAATAAATTTAACTAAAATTTTATCTTTTATATATTAAGCGAGGATAAAGATAGAGTCCAATTT  
TACATGTTACTTTTAGCAACAATTTAAATTGTAGTAAAAAGAAAAATCCGTTGGCTTTATTGACCGTGAGGGTTCAAGTCC  
CTCTACCCCCA-----AAAGT-----CTAA-----CCTTTC-----TTTTTATTGACATAAGCT  
CCTAGTTTATGTTACGATAGCCGAAACAAAACAA-TAAATAAAAAATTTAAATA

>P640

AAATCGTGGTGCCTTGCACCTCGAATTGTAGTCTGGAGAAGTGTCTCTGCAACGGACCAGACCCAAGTTCACCTGGAAG  
TGGCGTCAGAGAGGGTGAAAACCCCGTCGAGTCTGGACACTGTTGCAAAACGAGGCACTGTCTGCGAGTCGAGCTGTTTG  
GGAATGCAGCTCTAAGTGGGTGGTAAATTCATCCAAGGCTAAATATTGGCAAGAGACCGATAGCGAACAAGTACCGCGA  
GGGAAAGATGAAAAGGACTTTGAAAAGAGAGTTAAAAAGTGCTTGAAATGCTGGGAGGGAAGCGAATGGAAGCTGCGGG  
TGTGCCCTGGTTGGATGTGGAACGGTTTAGGCTGGTCCGCCGCTCAACGCGGGGCACTGGTCAGCGTGGGCCATCGCGGC  
GGGACAAGAGCAGGATGTAGTTTCTTGCCATGCGGTTGTGGTGGCCGAGGAACGAAGCATGCG-CCACTTGTGG-CGTG  
GTA--TTTATACCAACTGCATGCTCGGGACGCTGGCGTATTGAGCTCTTCATCCGACCCGTCTTGAAACACGGACCAAGG  
AGTCTAACATGTATGCGAGCCGGTGGGCGGCAAACCCATTGAGGCGCAAGTAACTGACA-TTT?A-AAAATTTGGAAGT  
AATAAAATTAGTTGCTGATTGTATTGAAAAAATA-----TTT-----AGTATCA  
-----ACTC-----GATCA-----TT  
TAATTATTGAGTAAATTTATTATCTTGAACCTTATTACTTATATATATATATATATATAT--AAGTATATAAAATAAAAAA-  
TTAAAAATTGTAACAAA-TAAATAT-----TTCTTATA-----GT  
ATAGAAAGATTCTAAAATTATAAAGTGATTAAAATAAAAAAAATTTCTTG-----TTCACCTAAAAAAAGAA  
ATTAGGCAATATTTTATTTTTTGTATTCTTTAATACGTTTTTAATTAATTTTATTTTATTAATTAGTTTAAACATTCA  
AAAGATTATTAGGTCAATGCTTAGAAAAATAAAAAATAATTTACTAAAAATAATCTGAGTTGCATCAAATATAAAAAATA  
ATATACAATGATACTGTTTTGTTATAGGAAAA-TCAGTTTATCTAAAAAATAGACAAAATTAAATACCAAAGAAGTTTTT  
TTATAAGATT---AAAAGAAAAAACTTATTTGTGCGAGCAGACCTCATCCTTGCAAGAATTATCAATTGAG-AAAATTTTT  
AAAAAAAAAAAAAAT?AAAATATATA?T???AAAATAAAAAAAATAAAAAATAA-CTTAAA---TAATTTGAGCTTTAGT  
AGAAAACTTACTAAATGCTAGCTTTTTCAGATTTCAGGGAACTTAGGTTGAAAAAGTATAAGCAATCCTGAGCCAAATTT  
TATTCCTTTAAAAATAAGATAGGTGCAGAGACTCAATGGAAGCTATCCTAACGAATAATATTTTAAAGATTTTTTT-AATTA  
AATAATTAATTAATAGAAATAAATTTAACTAAAATTTTATCTTTTATATATTAAGCGAGGATAAAGATAGAGTCCAATTT  
TACATGTTACTTTTAGCAACAATTTAAATTGTAGTAAAAAGAAAAATCCGTTGGCTTTATTGACCGTGAGGGTTCAAGTCC  
CTCTACCCCCA-----AAAGT-----CTAA-----CCTTTC-----TTTTTATTGACATAAGCT  
CCTAGTTTATGTTACGATAGCCGAAACAAAACAA-TAAATAAAAAATTTAAATA

>P641

AAATCGTGGTGCCTTGCACCTCGAATTGTAGTCTGGAGAAGTGTCTCTGCAACGGACCAGACCCAAGTTCACCTGGAAG  
TGGCGTCAGAGAGGGTGAAAACCCCGTCGAGTCTGGACACTGTTGCAAAACGAGGCACTGTCTGCGAGTCGAGCTGTTTG  
GGAATGCAGCTCTAAGTGGGTGGTAAATTCATCCAAGGCTAAATATTGGCAAGAGACCGATAGCGAACAAGTACCGCGA  
GGGAAAGATGAAAAGGACTTTGAAAAGAGAGTTAAAAAGTGCTTGAAATGCTGGGAGGGAAGCGAATGGAAGCTGCGGG  
TGTGCCCTGGTTGGATGTGGAACGGTTTAGGCTGGTCCGCCGCTCAACGCGGGGCACTGGTCAGCGTGGGCCATCGCGGC  
GGGACAAGAGCAGGATGTAGTTTCTTGCCATGCGGTTGTGGTGGCCGAGGAACGAAGCATGCG-CCACTTGTGG-CGTG  
GTA--TTTATACCAACTGCATGCTCGGGACGCTGGCGTATTGAGCTCTTCATCCGACCCGTCTTGAAACACGGACCAAGG  
AGTCTAACATGTATGCGAGCCGGTGGGCGGCAAACCCATTGAGGCGCAAGTAACTGACA-TTT?A-AAAATTTGGAAGT  
AATAAAATTAGTTGCTGATTGTATTGAAAAAATA-----TTT-----AGTATCA  
-----ACTC-----GATCA-----TT  
TAATTATTGAGTAAATTTATTATCTTGAACCTTATTACTTATATATATATATATATATAT--AAGTATATAAAATAAAAAA-  
TTAAAAATTGTAACAAA-TAAATAT-----TTCTTATA-----GT

ATAGAAAGATTCTAAAATTATAAAGTGATTAAAATAAAAAAAAAAATTCTTG-----TTCACTTAAAAAAAAAGAA  
ATTAGGCAATATTTTATTTTTTGTATTCTTTAATACGTTTTTAATTAAATTTTATTTTTTATTAATTAGTTTAAACATTCA  
AAAGATTATTAGGTCAATGCTTAGAAAAATAAAAAATAATTTACTAAAAATAATCTGAGTTGCATCAAATATAAAAAATA  
ATATACAATGATACTGTTTTGTTATAGGAAAA-TCAGTTTATCTAAAAAATAGACAAAATTAAATACCAAAGAAGTTTTT  
TTATAAGATT---AAAAGAAAAAACTTATTTGTCGAGCAGACCTCATCCTTGCAAGAATTATCAATTGAG-AAAATTTTT  
AAAAAAAAAAAAAAT?AAAATATATA?T??AAAATAAAAAAAAAAATAAAATAAA-CTTAAA---TAATTTGAGCTTTAGT  
AGAAAACTTACTAAATGCTAGCTTTTTCAGATTTCAGGGAACTTAGGTTGAAAAAGTATAAGCAATCCTGAGCCAAATTT  
TATTCCTTTAAAAATAAGATAGGTGCAGAGACTCAATGGAAGCTATCCTAACGAATAATATTTTAAGATTTTTTTT-AATTA  
AATAATTAATTAATAGAAATAAATTTAACTAAAATTTTATCTTTTATATATTAAGCGAGGATAAAGATAGAGTCCAATTT  
TACATGTTACTTTTAGCAACAATTTAAATTGTAGTAAAAAGAAAATCCGTTGGCTTTATTGACCGTGAGGGTTCAAGTCC  
CTCTACCCCCA-----AAAGT-----CTAA----CCTTTC-----TTTTATTGACATAAGCT  
CCTAGTTTATGTTACGATAGCCGAAACAAAACAA-TAAATAAAAAATTTAAATA

>P642

AAATCGTGGTGCCTTGCACCTCGAATTGTAGTCTGGAGAAGTGTCTCTGCAACGGACCAGACCCAAGTTCACTGGAAAG  
TGGCGTCAGAGAGGGTGAAAACCCCGTCGAGTCTGGACACTGTTGCAAAACGAGGCACTGTCTGCGAGTCGAGCTGTTTG  
GGAATGCAGCTCTAAGTGGGTGGTAAATTCCATCCAAGGCTAAATATTGGCAAGAGACCGATAGCGAACAAGTACCGCGA  
GGGAAAGATGAAAAGGACTTTGAAAAGAGAGTTAAAAAGTGCTTGAAATTGCTGGGAGGGAAGCGAATGGAAGCTGCGGG  
TGTGCCCTGGTTGGATGTGGAACGGTTTAGGCTGGTCCGCCGCTCAACGCGGGGCACTGGTCAGCGTGGGCCATCGCGGC  
GGGACAAGAGCAGGATGTAGTTTCTTGCCATGCGGTTGTGGTGGCCGAGGAACGAAGCATGCG-CCACTTGTGG-CGTG  
GTA--TTTATACCAACTGCATGCTCGGGACGCTGGCGTATTGAGCTCTTCATCCGACCCGCTCTTGAAACACGGACCAAGG  
AGTCTAACATGTATGCGAGCCGGTGGGCGGCAAACCCATTGAGGCGCAAGTAACTGACA-TTT?A-AAAATTTGGAAGT  
AATAAAATTAGTTGCTGATTGTATTGAAAAAATA-----TTT-----AGTATCA  
-----ACTC-----GATCA-----TT  
TAATTATTGAGTAAAAATTATTATCTTGAACCTTATTACTTATATATATATATATATAT--AAGTATATAAAATAAAAAA-  
TTAAAAATTGTAACAAA-TAAATAT-----TTCTTATA-----GT  
ATAGAAAGATTCTAAAATTATAAAGTGATTAAAATAAAAAAAAAAATTCTTG-----TTCACTTAAAAAAAAAGAA  
ATTAGGCAATATTTTATTTTTTGTATTCTTTAATACGTTTTTAATTAAATTTTATTTTTTATTAATTAGTTTAAACATTCA  
AAAGATTATTAGGTCAATGCTTAGAAAAATAAAAAATAATTTACTAAAAATAATCTGAGTTGCATCAAATATAAAAAATA  
ATATACAATGATACTGTTTTGTTATAGGAAAA-TCAGTTTATCTAAAAAATAGACAAAATTAAATACCAAAGAAGTTTTT  
TTATAAGATT---AAAAGAAAAAACTTATTTGTCGAGCAGACCTCATCCTTGCAAGAATTATCAATTGAG-AAAATTTTT  
AAAAAAAAAAAAAAT?AAAATATATA?T??AAAATAAAAAAAAAAATAAAATAAA-CTTAAA---TAATTTGAGCTTTAGT  
AGAAAACTTACTAAATGCTAGCTTTTTCAGATTTCAGGGAACTTAGGTTGAAAAAGTATAAGCAATCCTGAGCCAAATTT  
TATTCCTTTAAAAATAAGATAGGTGCAGAGACTCAATGGAAGCTATCCTAACGAATAATATTTTAAGATTTTTTTT-AATTA  
AATAATTAATTAATAGAAATAAATTTAACTAAAATTTTATCTTTTATATATTAAGCGAGGATAAAGATAGAGTCCAATTT  
TACATGTTACTTTTAGCAACAATTTAAATTGTAGTAAAAAGAAAATCCGTTGGCTTTATTGACCGTGAGGGTTCAAGTCC  
CTCTACCCCCA-----AAAGT-----CTAA----CCTTTC-----TTTTATTGACATAAGCT  
CCTAGTTTATGTTACGATAGCCGAAACAAAACAA-TAAATAAAAAATTTAAATA

>P643

AAATCGTGGTGCCTTGCACCTCGAATTGTAGTCTGGAGAAGTGTCTCTGCAACGGACCAGACCCAAGTTCACTGGAAAG  
TGGCGTCAGAGAGGGTGAAAACCCCGTCGAGTCTGGACACTGTTGCAAAACGAGGCACTGTCTGCGAGTCGAGCTGTTTG  
GGAATGCAGCTCTAAGTGGGTGGTAAATTCCATCCAAGGCTAAATATTGGCAAGAGACCGATAGCGAACAAGTACCGCGA  
GGGAAAGATGAAAAGGACTTTGAAAAGAGAGTTAAAAAGTGCTTGAAATTGCTGGGAGGGAAGCGAATGGAAGCTGCGGG  
TGTGCCCTGGTTGGATGTGGAACGGTTTAGGCTGGTCCGCCGCTCAACGCGGGGCACTGGTCAGCGTGGGCCATCGCGGC  
GGGACAAGAGCAGGATGTAGTTTCTTGCCATGCGGTTGTGGTGGCCGAGGAACGAAGCATGCG-CCACTTGTGG-CGTG  
GTA--TTTATACCAACTGCATGCTCGGGACGCTGGCGTATTGAGCTCTTCATCCGACCCGCTCTTGAAACACGGACCAAGG  
AGTCTAACATGTATGCGAGCCGGTGGGCGGCAAACCCATTGAGGCGCAAGTAACTGACA-TTT?A-AAAATTTGGAAGT  
AATAAAATTAGTTGCTGATTGTATTGAAAAAATA-----TTT-----AGTATCA  
-----ACTC-----GATCA-----TT  
TAATTATTGAGTAAAAATTATTATCTTGAACCTTATTACTTATATATATATATATATATAT--AAGTATATAAAATAAAAAA-  
TTAAAAATTGTAACAAA-TAAATAT-----TTCTTATA-----GT  
ATAGAAAGATTCTAAAATTATAAAGTGATTAAAATAAAAAAAAAAATTCTTG-----TTCACTTAAAAAAAAAGAA  
ATTAGGCAATATTTTATTTTTTGTATTCTTTAATACGTTTTTAATTAAATTTTATTTTTTATTAATTAGTTTAAACATTCA  
AAAGATTATTAGGTCAATGCTTAGAAAAATAAAAAATAATTTACTAAAAATAATCTGAGTTGCATCAAATATAAAAAATA  
ATATACAATGATACTGTTTTGTTATAGGAAAA-TCAGTTTATCTAAAAAATAGACAAAATTAAATACCAAAGAAGTTTTT  
TTATAAGATT---AAAAGAAAAAACTTATTTGTCGAGCAGACCTCATCCTTGCAAGAATTATCAATTGAG-AAAATTTTT  
AAAAAAAAAAAAAAT?AAAATATATA?T??AAAATAAAAAAAAAAATAAAATAAA-CTTAAA---TAATTTGAGCTTTAGT  
AGAAAACTTACTAAATGCTAGCTTTTTCAGATTTCAGGGAACTTAGGTTGAAAAAGTATAAGCAATCCTGAGCCAAATTT  
TATTCCTTTAAAAATAAGATAGGTGCAGAGACTCAATGGAAGCTATCCTAACGAATAATATTTTAAGATTTTTTTT-AATTA

AATAATTAATTAATAGAAATAAATTTAACTAAAATTTTATCTTTTATATATTAAGCGAGGATAAAAGATAGAGTCCAATTT  
TACATGTTACTTTTAGCAACAATTTAAATTGTAGTAAAAAGAAAATCCGTTGGCTTTATTGACCGTGAGGGTTCAAGTCC  
CTCTACCCCCA-----AAAGT-----CTAA----CCTTTC-----TTTTATTGACATAAGCT  
CCTAGTTTATGTTACGATAGCCGAAACAAAACAA-TAAATAAAAAATTTAAATA

>P644

AAATCGTGGTGCCTTGCACCTCGAATTGTAGTCTGGAGAAGTGTCTCTGCAACGGACCAGACCCAAGTTCACCTGGAAG  
TGGCGTCAGAGAGGGTGAAAACCCCGTCGAGTCTGGACACTGTTGCAAAACGAGGCACTGTCTGCGAGTCGAGCTGTTTG  
GGAATGCAGCTCTAAGTGGGTGGTAAATTCCATCCAAGGCTAAATATTGGCAAGAGACCGATAGCGAACAAGTACCGCGA  
GGGAAAGATGAAAAGGACTTTGAAAAGAGAGTTAAAAAGTGCTTGAAATTGCTGGGAGGGAAGCGAATGGAAGCTGCGGG  
TGTGCCCTGGTTGGATGTGGAACGGTTTAGGCTGGTCCGCCGCTCAACGCGGGGCACTGGTCAGCGTGGGCCATCGCGGC  
GGGACAAGAGCAGGATGTAGTTTCTTGCCATGCCGTTGTGGTGGCCGAGGAACGAAGCATGCG-CCACTTGTGG-CGTG  
GTA--TTTATACCAACTGCATGCTCGGGACGCTGGCGTATTGAGCTCTTCATCCGACCCGCTCTTGAAACACGGACCAAGG  
AGTCTAACATGTATGCGAGCCGGTGGGCGGCAAACCCATTGAGGCGCAAGTAACTGACA-TTT?A-AAAATTTGGAAGT  
AATAAAATTAGTTGCTGATTGTATTGAAAAAATA-----TTT-----AGTATCA  
-----ACTC-----GATCA-----TT  
TAATTATTGAGTAAAAATTATTATCTTGAACCTTATTACTTATATATATATATATATATAAGTATATAAAATAAAAAAA-  
TTAAAAATTGTAACAAA-TAAATAT-----TTCTTATA-----GT  
ATAGAAAGATTCTAAAATTATAAAGTGATTAAAAATAAAAAAAAATTCCTG-----TTCACCTAAAAAAAAGAA  
ATTAGGCAATATTTTATTTTTTGTATTCTTTAATACGTTTTTAATTAATTTTATTTTATTAATTAGTTTAAACATTCA  
AAAGATTATTAGGTCAATGCTTAGAAAAATAAAAAATAATTTACTAAAAATAATCTGAGTTGCATCAATATAAAAAATA  
ATATACAATGATACTGTTTTGTTATAGGAAAA-TCAGTTTATCTAAAAATAGACAAAATTAAATACCAAAGAAGTTTTT  
TTATAAGATT---AAAAGAAAAAACTTATTTGTCGAGCAGACCTCATCCTTGCAAGAATTATCAATTGAG-AAAATTTTT  
AAAAAAAAAAAAAAAAAATATATA?T??TAAAAATAAAAAAAAATAAAATAAA-CTTAAA---TAATTTGAGCTTTAGT  
AGAAAACTTACTAAATGCTAGCTTTTTCAGATTTCAGGGAACTTAGGTTGAAAAAGTATAAGCAATCCTGAGCCAAATTT  
TATTCTTTTAAAAATAAGATAGGTGCAGAGACTCAATGGAAGCTATCCTAACGAATAATATTTTAAGATTTTTTTT-AATTA  
AATAATTAATTAATAGAAATAAATTTAACTAAAATTTTATCTTTTATATATTAAGCGAGGATAAAAGATAGAGTCCAATTT  
TACATGTTACTTTTAGCAACAATTTAAATTGTAGTAAAAAGAAAATCCGTTGGCTTTATTGACCGTGAGGGTTCAAGTCC  
CTCTACCCCCA-----AAAGT-----CTAA----CCTTTC-----TTTTATTGACATAAGCT  
CCTAGTTTATGTTACGATAGCCGAAACAAAACAA-TAAATAAAAAATTTAAATA

>P645

AAATCGTGGTGCCTTGCACCTCGAATTGTAGTCTGGAGAAGTGTCTCTGCAACGGACCAGACCCAAGTTCACCTGGAAG  
TGGCGTCAGAGAGGGTGAAAACCCCGTCGAGTCTGGACACTGTTGCAAAACGAGGCACTGTCTGCGAGTCGAGCTGTTTG  
GGAATGCAGCTCTAAGTGGGTGGTAAATTCCATCCAAGGCTAAATATTGGCAAGAGACCGATAGCGAACAAGTACCGCGA  
GGGAAAGATGAAAAGGACTTTGAAAAGAGAGTTAAAAAGTGCTTGAAATTGCTGGGAGGGAAGCGAATGGAAGCTGCGGG  
TGTGCCCTGGTTGGATGTGGAACGGTTTAGGCTGGTCCGCCGCTCAACGCGGGGCACTGGTCAGCGTGGGCCATCGCGGC  
GGGACAAGAGCAGGATGTAGTTTCTTGCCATGCCGTTGTGGTGGCCGAGGAACGAAGCATGCG-CCACTTGTGG-CGTG  
GTA--TTTATACCAACTGCATGCTCGGGACGCTGGCGTATTGAGCTCTTCATCCGACCCGCTCTTGAAACACGGACCAAGG  
AGTCTAACATGTATGCGAGCCGGTGGGCGGCAAACCCATTGAGGCGCAAGTAACTGACA-TTT?A-AAAATTTGGAAGT  
AATAAAATTAGTTGCTGATTGTATTGAAAAAATA-----TTT-----AGTATCA  
-----ACTC-----GATCA-----TT  
TAATTATTGAGTAAAAATTATTATCTTGAACCTTATTACTTATATATATATATATATATATAT--AAGTATATAAAATAAAAAAA-  
TTAAAAATTGTAACAAA-TAAATAT-----TTCTTATA-----GT  
ATAGAAAGATTCTAAAATTATAAAGTGATTAAAAATAAAAAAAAATTCCTG-----TTCACCTAAAAAAAAGAA  
ATTAGGCAATATTTTATTTTTTGTATTCTTTAATACGTTTTTAATTAATTTTATTTTATTAATTAGTTTAAACATTCA  
AAAGATTATTAGGTCAATGCTTAGAAAAATAAAAAATAATTTACTAAAAATAATCTGAGTTGCATCAATATAAAAAATA  
ATATACAATGATACTGTTTTGTTATAGGAAAA-TCAGTTTATCTAAAAATAGACAAAATTAAATACCAAAGAAGTTTTT  
TTATAAGATT---AAAAGAAAAAACTTATTTGTCGAGCAGACCTCATCCTTGCAAGAATTATCAATTGAG-AAAATTTTT  
AAAAAAAAAAAAAAT?AAAATATATA?T??TAAAAATAAAAAAAAATAAAATAAA-CTTAAA---TAATTTGAGCTTTAGT  
AGAAAACTTACTAAATGCTAGCTTTTTCAGATTTCAGGGAACTTAGGTTGAAAAAGTATAAGCAATCCTGAGCCAAATTT  
TATTCTTTTAAAAATAAGATAGGTGCAGAGACTCAATGGAAGCTATCCTAACGAATAATATTTTAAGATTTTTTTT-AATTA  
AATAATTAATTAATAGAAATAAATTTAACTAAAATTTTATCTTTTATATATTAAGCGAGGATAAAAGATAGAGTCCAATTT  
TACATGTTACTTTTAGCAACAATTTAAATTGTAGTAAAAAGAAAATCCGTTGGCTTTATTGACCGTGAGGGTTCAAGTCC  
CTCTACCCCCA-----AAAGT-----CTAA----CCTTTC-----TTTTATTGACATAAGCT  
CCTAGTTTATGTTACGATAGCCGAAACAAAACAA-TAAATAAAAAATTTAAATA

>P646

AAATCGTGGTGCCTTGCACCTCGAATTGTAGTCTGGAGAAGTGTCTCTGCAACGGACCAGACCCAAGTTCACCTGGAAG  
TGGCGTCAGAGAGGGTGAAAACCCCGTCGAGTCTGGACACTGTTGCAAAACGAGGCACTGTCTGCGAGTCGAGCTGTTTG  
GGAATGCAGCTCTAAGTGGGTGGTAAATTCCATCCAAGGCTAAATATTGGCAAGAGACCGATAGCGAACAAGTACCGCGA

GGGAAAGATGAAAAGGACTTTGAAAAGAGAGTTAAAAAGTGCTTGAAATTGCTGGGAGGGAAGCGAATGGAAGCTGCGGG  
TGTGCCCTGGTTGGATGTGGAACGGTTTAGGCTGGTCCGCCGCTCAACGCGGGGCACTGGTCAGCGTGGGCCATCGCGGC  
GGGACAAGAGCAGGATGTAGTTTCTTGCCATGCCGTTGTGGTGGCCGAGGAACGAAGCATGCG-CCACTTGTGG-CGTG  
GTA--TTTATACCAACTGCATGCTCGGGACGCTGGCGTATTGAGCTCTTCATCCGACCCGTCTTGAAACACGGACCAAGG  
AGTCTAACATGTATGCGAGCCGGTGGGCGGCAAACCCATTGAGGCGCAAGTAACTGACA-TTT?A-AAAATTTGGAAGT  
AATAAAATTAGTTGCTGATTGTATTGAAAAAATA-----TTT-----AGTATCA  
-----ACTC-----GATCA-----TT  
TAATTATTGAGTAAAATTATTATCTTGAACCTTATTACTTATATATATATATATATATAT--AAGTATATAAAATAAAAAA-  
TTAAAAATTGTAACAAA-TAAATAT-----TTCTTATA-----GT  
ATAGAAAGATTCTAAAATTATAAAGTGATTAAAATAAAAAAAATTTCTTG-----TTCACCTAAAAAAAAGAA  
ATTAGGCAATATTTTATTTTTTGTATTCTTTAATACGTTTTTAATTAAATTTTATTTTATTAATTAGTTTAACATTCA  
AAAGATTATTAGGTCAATGCTTAGAAAAATAAAAAATAATTTACTAAAAATAATCTGAGTTGCATCAAATATAAAAAATA  
ATATACAATGATACTGTTTTGTTATAGGAAAA-TCAGTTTATCTAAAAATAGACAAAATTAAATACCAAAGAAGTTTTT  
TTATAAGATT---AAAAGAAAAAACTTATTTGTCGAGCAGACCTCATCCTTGCAAGAATTATCAATTGAG-AAAATTTTT  
AAAAAAAAAAAAAAT?AAAATATATA?T???AAAATAAAAAAAATAAAAAATAA-CTTAAA---TAATTTGAGCTTTAGT  
AGAAAACTTACTAAATGCTAGCTTTTTCAGATTTCAGGGAACTTAGGTTGAAAAAGTATAAGCAATCCTGAGCCAAATTT  
TATTCCTTTAAAAATAAGATAGGTGCAGAGACTCAATGGAAGCTATCCTAACGAATAATATTTTAAGATTTTTTTT-AATTA  
AATAATTAATTAATAGAAATAAATTTAACTAAAAATTTTATCTTTTATATATTAAGCGAGGATAAAGATAGAGTCCAATTT  
TACATGTTACTTTTAGCAACAATTTAAATTGTAGTAAAAAGAAAAATCCGTTGGCTTTATTGACCGTGAGGGTTCAAGTCC  
CTCTACCCCA-----AAAGT-----CTAA-----CCTTTC-----TTTTATTGACATAAGCT  
CCTAGTTTATGTTACGATAGCCGAAACAAAACAA-TAAATAAAAAATTTAAATA

>P647

AAATCGTGGTGCCTTGCACCTCGAATTGTAGTCTGGAGAAGTGTCTCTGCAACGGACCAGACCCAAGTTCACTGGAAG  
TGGCGTCAGAGAGGGTGAAAACCCCGTCGAGTCTGGACACTGTTGCAAAACGAGGCACTGTCTGCGAGTCGAGCTGTTTG  
GGAATGCAGCTCTAAGTGGGTGGTAAATTCCATCCAAGGCTAAATATTGGCAAGAGACCGATAGCGAACAAGTACCGCGA  
GGGAAAGATGAAAAGGACTTTGAAAAGAGAGTTAAAAAGTGCTTGAAATTGCTGGGAGGGAAGCGAATGGAAGCTGCGGG  
TGTGCCCTGGTTGGATGTGGAACGGTTTAGGCTGGTCCGCCGCTCAACGCGGGGCACTGGTCAGCGTGGGCCATCGCGGC  
GGGACAAGAGCAGGATGTAGTTTCTTGCCATGCCGTTGTGGTGGCCGAGGAACGAAGCATGCG-CCACTTGTGG-CGTG  
GTA--TTTATACCAACTGCATGCTCGGGACGCTGGCGTATTGAGCTCTTCATCCGACCCGTCTTGAAACACGGACCAAGG  
AGTCTAACATGTATGCGAGCCGGTGGGCGGCAAACCCATTGAGGCGCAAGTAACTGACA-TTT?A-AAAATTTGGAAGT  
AATAAAATTAGTTGCTGATTGTATTGAAAAAATA-----TTT-----AGTATCA  
-----ACTC-----GATCA-----TT  
TAATTATTGAGTAAAATTATTATCTTGAACCTTATTACTTATATATATATATATATATAT--AAGTATATAAAATAAAAAA-  
TTAAAAATTGTAACAAA-TAAATAT-----TTCTTATA-----GT  
ATAGAAAGATTCTAAAATTATAAAGTGATTAAAATAAAAAAAATTTCTTG-----TTCACCTAAAAAAAAGAA  
ATTAGGCAATATTTTATTTTTTGTATTCTTTAATACGTTTTTAATTAAATTTTATTTTATTAATTAGTTTAACATTCA  
AAAGATTATTAGGTCAATGCTTAGAAAAATAAAAAATAATTTACTAAAAATAATCTGAGTTGCATCAAATATAAAAAATA  
ATATACAATGATACTGTTTTGTTATAGGAAAA-TCAGTTTATCTAAAAATAGACAAAATTAAATACCAAAGAAGTTTTT  
TTATAAGATT---AAAAGAAAAAACTTATTTGTCGAGCAGACCTCATCCTTGCAAGAATTATCAATTGAG-AAAATTTTT  
AAAAAAAAAAAAAAT?AAAATATATA?T???AAAATAAAAAAAATAAAAAATAA-CTTAAA---TAATTTGAGCTTTAGT  
AGAAAACTTACTAAATGCTAGCTTTTTCAGATTTCAGGGAACTTAGGTTGAAAAAGTATAAGCAATCCTGAGCCAAATTT  
TATTCCTTTAAAAATAAGATAGGTGCAGAGACTCAATGGAAGCTATCCTAACGAATAATATTTTAAGATTTTTTTT-AATTA  
AATAATTAATTAATAGAAATAAATTTAACTAAAAATTTTATCTTTTATATATTAAGCGAGGATAAAGATAGAGTCCAATTT  
TACATGTTACTTTTAGCAACAATTTAAATTGTAGTAAAAAGAAAAATCCGTTGGCTTTATTGACCGTGAGGGTTCAAGTCC  
CTCTACCCCA-----AAAGT-----CTAA-----CCTTTC-----TTTTATTGACATAAGCT  
CCTAGTTTATGTTACGATAGCCGAAACAAAACAA-TAAATAAAAAATTTAAATA

>P648

AAATCGTGGTGCCTTGCACCTCGAATTGTAGTCTGGAGAAGTGTCTCTGCAACGGACCAGACCCAAGTTCACTGGAAG  
TGGCGTCAGAGAGGGTGAAAACCCCGTCGAGTCTGGACACTGTTGCAAAACGAGGCACTGTCTGCGAGTCGAGCTGTTTG  
GGAATGCAGCTCTAAGTGGGTGGTAAATTCCATCCAAGGCTAAATATTGGCAAGAGACCGATAGCGAACAAGTACCGCGA  
GGGAAAGATGAAAAGGACTTTGAAAAGAGAGTTAAAAAGTGCTTGAAATTGCTGGGAGGGAAGCGAATGGAAGCTGCGGG  
TGTGCCCTGGTTGGATGTGGAACGGTTTAGGCTGGTCCGCCGCTCAACGCGGGGCACTGGTCAGCGTGGGCCATCGCGGC  
GGGACAAGAGCAGGATGTAGTTTCTTGCCATGCCGTTGTGGTGGCCGAGGAACGAAGCATGCG-CCACTTGTGG-CGTG  
GTA--TTTATACCAACTGCATGCTCGGGACGCTGGCGTATTGAGCTCTTCATCCGACCCGTCTTGAAACACGGACCAAGG  
AGTCTAACATGTATGCGAGCCGGTGGGCGGCAAACCCATTGAGGCGCAAGTAACTGACA-TTT?A-AAAATTTGGAAGT  
AATAAAATTAGTTGCTGATTGTATTGAAAAAATA-----TTT-----AGTATCA  
-----ACTC-----GATCA-----TT  
TAATTATTGAGTAAAATTATTATCTTGAACCTTATTACTTATATATATATATATATATAT--AAGTATATAAAATAAAAAA-

TTAAAAATTGTAACAAA-TAAATAT-----TTCTTATA-----GT  
ATAGAAAGATTCTAAAATTATAAAGTGATTAAAATAAAAAAAAATTCTTG-----TTCACTTAAAAAAAAGAA  
ATTAGGCAATATTTTATTTTTTGTATTCTTTAATACGTTTTTAATTAAATTTTATTTTTATTAATTAGTTTAAACATTCA  
AAAGATTATTAGGTCAATGCTTAGAAAAATAAAAAATAATTTACTAAAAATAATCTGAGTTGCATCAAATATAAAAAATA  
ATATACAATGATACTGTTTTGTTATAGGAAAA-TCAGTTTATCTAAAAAATAGACAAAATTAAATACCAAAGAAGTTTTT  
TTATAAGATT---AAAAGAAAAAACTTATTTGTCGAGCAGACCTCATCCTTGCAAGAATTATCAATTGAG-AAAATTTTT  
AAAAAAAATAAAT?AAAATATATA?T??AAAATAAAAAAAAATAAAATAAA-CTTAAA---TAATTTGAGCTTTAGT  
AGAAAACTTACTAAATGCTAGCTTTTTCAGATTCAGGGAACTTAGGTTGAAAAAGTATAAGCAATCCTGAGCCAAATTT  
TATTCCTTTAAAAATAAGATAGGTGCAGAGACTCAATGGAAGCTATCCTAACGAATAATATTTTAAGATTTTTTT-AATTA  
AATAATTAATTAATAGAAATAAATTTAACTAAAATTTTATCTTTTATATATTAAGCGAGGATAAAGATAGAGTCCAATTT  
TACATGTTACTTTTAGCAACAATTTAAATTGTAGTAAAAAGAAAAATCCGTTGGCTTTATTGACCGTGAGGGTTCAAGTCC  
CTCTACCCCCA-----AAAGT-----CTAA----CCTTTC-----TTTTATTGACATAAGCT  
CCTAGTTTATGTTACGATAGCCGAAACAAAACAA-TAAATAAAAAATTTAAATA

>P649

AAATCGTGGTGCCTTGCACCTCGAATTGTAGTCTGGAGAAGTGTCTCTGCAACGGACCAGACCCAAGTTCACTGGAAAG  
TGGCGTCAGAGAGGGTGAAAACCCCGTCGAGTCTGGACACTGTTGCAAAACGAGGCACTGTCTGCGAGTCGAGCTGTTTG  
GGAATGCAGCTCTAAGTGGGTGGTAAATTCATCCAAGGCTAAATATTGGCAAGAGACCGATAGCGAACAAGTACCGCGA  
GGGAAAGATGAAAAGGACTTTGAAAAGAGAGTTAAAAAGTGCTTGAAATTGCTGGGAGGGAAGCGAATGGAAGCTGCGGG  
TGTGCCCTGGTTGGATGTGGAACGGTTTAGGCTGGTCCGCCGCTCAACGCGGGGCACTGGTCAGCGTGGGCCATCGCGGC  
GGGACAAGAGCAGGATGTAGTTTCTTGCCATGCGGTTGTGGTGGCCGAGGAACGAAGCATGCG-CCACTTGTGG-CGTG  
GTA--TTTATACCAACTGCATGCTCGGGACGCTGGCGTATTGAGCTCTTCATCCGACCCGCTCTTGAAACACGGACCAAGG  
AGTCTAACATGTATGCGAGCCGGTGGGCGGCAAACCCATTGAGGCGCAAGTAACTGACA-TTT?A-AAAATTTGGAAGT  
AATAAAATTAGTTGCTGATTGTATTGAAAAAATA-----TTT-----AGTATCA  
-----ACTC-----GATCA-----TT  
TAATTATTGAGTAAAAATTATTATCTTGAACCTTATTACTTATATATATATATATATAT--AAGTATATAAAATAAAAAA-  
TTAAAAATTGTAACAAA-TAAATAT-----TTCTTATA-----GT  
ATAGAAAGATTCTAAAATTATAAAGTGATTAAAATAAAAAAAAATTCTTG-----TTCACTTAAAAAAAAGAA  
ATTAGGCAATATTTTATTTTTTGTATTCTTTAATACGTTTTTAATTAAATTTTATTTTTATTAATTAGTTTAAACATTCA  
AAAGATTATTAGGTCAATGCTTAGAAAAATAAAAAATAATTTACTAAAAATAATCTGAGTTGCATCAAATATAAAAAATA  
ATATACAATGATACTGTTTTGTTATAGGAAAA-TCAGTTTATCTAAAAAATAGACAAAATTAAATACCAAAGAAGTTTTT  
TTATAAGATT---AAAAGAAAAAACTTATTTGTCGAGCAGACCTCATCCTTGCAAGAATTATCAATTGAG-AAAATTTTT  
AAAAAAAATAAAT?AAAATATATA?T??AAAATAAAAAAAAATAAAATAAA-CTTAAA---TAATTTGAGCTTTAGT  
AGAAAACTTACTAAATGCTAGCTTTTTCAGATTCAGGGAACTTAGGTTGAAAAAGTATAAGCAATCCTGAGCCAAATTT  
TATTCCTTTAAAAATAAGATAGGTGCAGAGACTCAATGGAAGCTATCCTAACGAATAATATTTTAAGATTTTTTT-AATTA  
AATAATTAATTAATAGAAATAAATTTAACTAAAATTTTATCTTTTATATATTAAGCGAGGATAAAGATAGAGTCCAATTT  
TACATGTTACTTTTAGCAACAATTTAAATTGTAGTAAAAAGAAAAATCCGTTGGCTTTATTGACCGTGAGGGTTCAAGTCC  
CTCTACCCCCA-----AAAGT-----CTAA----CCTTTC-----TTTTATTGACATAAGCT  
CCTAGTTTATGTTACGATAGCCGAAACAAAACAA-TAAATAAAAAATTTAAATA

>P650

AAATCGTGGTGCCTTGCACCTCGAATTGTAGTCTGGAGAAGTGTCTCTGCAACGGACCAGACCCAAGTTCACTGGAAAG  
TGGCGTCAGAGAGGGTGAAAACCCCGTCGAGTCTGGACACTGTTGCAAAACGAGGCACTGTCTGCGAGTCGAGCTGTTTG  
GGAATGCAGCTCTAAGTGGGTGGTAAATTCATCCAAGGCTAAATATTGGCAAGAGACCGATAGCGAACAAGTACCGCGA  
GGGAAAGATGAAAAGGACTTTGAAAAGAGAGTTAAAAAGTGCTTGAAATTGCTGGGAGGGAAGCGAATGGAAGCTGCGGG  
TGTGCCCTGGTTGGATGTGGAACGGTTTAGGCTGGTCCGCCGCTCAACGCGGGGCACTGGTCAGCGTGGGCCATCGCGGC  
GGGACAAGAGCAGGATGTAGTTTCTTGCCATGCGGTTGTGGTGGCCGAGGAACGAAGCATGCG-CCACTTGTGG-CGTG  
GTA--TTTATACCAACTGCATGCTCGGGACGCTGGCGTATTGAGCTCTTCATCCGACCCGCTCTTGAAACACGGACCAAGG  
AGTCTAACATGTATGCGAGCCGGTGGGCGGCAAACCCATTGAGGCGCAAGTAACTGACA-TTT?A-AAAATTTGGAAGT  
AATAAAATTAGTTGCTGATTGTATTGAAAAAATA-----TTT-----AGTATCA  
-----ACTC-----GATCA-----TT  
TAATTATTGAGTAAAAATTATTATCTTGAACCTTATTACTTATATATATATATATATATAT--AAGTATATAAAATAAAAAA-  
TTAAAAATTGTAACAAA-TAAATAT-----TTCTTATA-----GT  
ATAGAAAGATTCTAAAATTATAAAGTGATTAAAATAAAAAAAAATTCTTG-----TTCACTTAAAAAAAAGAA  
ATTAGGCAATATTTTATTTTTTGTATTCTTTAATACGTTTTTAATTAAATTTTATTTTTATTAATTAGTTTAAACATTCA  
AAAGATTATTAGGTCAATGCTTAGAAAAATAAAAAATAATTTACTAAAAATAATCTGAGTTGCATCAAATATAAAAAATA  
ATATACAATGATACTGTTTTGTTATAGGAAAA-TCAGTTTATCTAAAAAATAGACAAAATTAAATACCAAAGAAGTTTTT  
TTATAAGATT---AAAAGAAAAAACTTATTTGTCGAGCAGACCTCATCCTTGCAAGAATTATCAATTGAG-AAAATTTTT  
AAAAAAAATAAAT?AAAATATATA?T??AAAATAAAAAAAAATAAAATAAA-CTTAAA---TAATTTGAGCTTTAGT  
AGAAAACTTACTAAATGCTAGCTTTTTCAGATTCAGGGAACTTAGGTTGAAAAAGTATAAGCAATCCTGAGCCAAATTT

TATTCTTTAAAAATAAGATAGGTGCAGAGACTCAATGGAAGCTATCCTAACGAATAATATTTTAAGATTTTTTTT-AATTA  
AATAATTAATTAATAGAAATAAATTTAACTAAAATTTTATCTTTTATATATTAAGCGAGGATAAAGATAGAGTCCAATTT  
TACATGTTACTTTTAGCAACAATTTAAATTGTAGTAAAAAGAAAATCCGTTGGCTTTATTGACCGTGAGGGTTCAAGTCC  
CTCTACCCCCA-----AAAGT-----CTAA----CCTTTC-----TTTTATTGACATAAGCT  
CCTAGTTTATGTTACGATAGCCGAAACAAAACAA-TAAATAAAAAATTTAAATA

>P651

AAATCGTGGTGCCTTGCACCTCGAATTGTAGTCTGGAGAAGTGTCTCTGCAACGGACCAGACCCAAGTTCACCTGGAAG  
TGGCGTCAGAGAGGGTGAAAACCCCGTCGAGTCTGGACACTGTTGCAAAACGAGGCACTGTCTGCGAGTCGAGCTGTTTG  
GGAATGCAGCTCTAAGTGGGTGGTAAATTCCATCCAAGGCTAAATATTGGCAAGAGACCGATAGCGAACAAGTACCGCGA  
GGGAAAGATGAAAAGGACTTTGAAAAGAGAGTTAAAAAGTGCTTGAAATTGCTGGGAGGGAAGCGAATGGAAGCTGCGGG  
TGTGCCCTGGTTGGATGTGGAACGGTTTAGGCTGGTCCGCCGCTCAACGCGGGGCACTGGTCAGCGTGGGCCATCGCGGC  
GGGACAAGAGCAGGATGTAGTTTCTTGCCATGCCGTTGTGGTGGCCGAGGAACGAAGCATGCG-CCACTTGTGG-CGTG  
GTA--TTTATACCAACTGCATGCTCGGGACGCTGGCGTATTGAGCTCTTCATCCGACCCGCTCTTGAAACACGGACCAAGG  
AGTCTAACATGTATGCGAGCCGGTGGGCGGCAAACCCATTGAGGCGCAAGTAACTGACA-TTT?A-AAAATTTGGAAGT  
AATAAAATTAGTTGCTGATTGTATTGAAAAAATA-----TTT-----AGTATCA  
-----ACTC-----GATCA-----TT  
TAATTATTGAGTAAAAATTATTATCTTGAACCTTATTACTTATATATATATATATATAT--AAGTATATAAAATAAAAAA-  
TTAAAAATTGTAACAAA-TAAATAT-----TTCTTATA-----GT  
ATAGAAAGATTCTAAAATTATAAAGTGATTAAAAATAAAAAAAAATTCCTG-----TTCACCTAAAAAAAAGAA  
ATTAGGCAATATTTTATTTTTTGTATTCTTTAATACGTTTTTAATTAATTTTATTTTATTAATTAGTTTAACATTCA  
AAAGATTATTAGGTCAATGCTTAGAAAAATAAAAAATAATTTACTAAAAATAATCTGAGTTGCATCAAATATAAAAAATA  
ATATACAATGATACTGTTTTGTTATAGGAAAA-TCAGTTTATCTAAAAAATAGACAAAATTAAATACCAAAGAAGTTTTT  
TTATAAGATT---AAAAGAAAAAAGTTATTTGTCGAGCAGACCTCATCCTTGCAAGAATTATCAATTGAG-AAAATTTTT  
AAAAAAAAAAAAAAT?AAAATATATA?T???AAAAATAAAAAAAAATAAAATAAA-CTTAAA---TAATTTGAGCTTTAGT  
AGAAAACTTACTAAATGCTAGCTTTCAGATTCAGGGAACTTAGGTTGAAAAAGTATAAGCAATCCTGAGCCAAATTT  
TATTCTTTAAAAATAAGATAGGTGCAGAGACTCAATGGAAGCTATCCTAACGAATAATATTTTAAGATTTTTTTT-AATTA  
AATAATTAATTAATAGAAATAAATTTAACTAAAATTTTATCTTTTATATATTAAGCGAGGATAAAGATAGAGTCCAATTT  
TACATGTTACTTTTAGCAACAATTTAAATTGTAGTAAAAAGAAAATCCGTTGGCTTTATTGACCGTGAGGGTTCAAGTCC  
CTCTACCCCCA-----AAAGT-----CTAA----CCTTTC-----TTTTATTGACATAAGCT  
CCTAGTTTATGTTACGATAGCCGAAACAAAACAA-TAAATAAAAAATTTAAATA

>P652

AAATCGTGGTGCCTTGCACCTCGAATTGTAGTCTGGAGAAGTGTCTCTGCAACGGACCAGACCCAAGTTCACCTGGAAG  
TGGCGTCAGAGAGGGTGAAAACCCCGTCGAGTCTGGACACTGTTGCAAAACGAGGCACTGTCTGCGAGTCGAGCTGTTTG  
GGAATGCAGCTCTAAGTGGGTGGTAAATTCCATCCAAGGCTAAATATTGGCAAGAGACCGATAGCGAACAAGTACCGCGA  
GGGAAAGATGAAAAGGACTTTGAAAAGAGAGTTAAAAAGTGCTTGAAATTGCTGGGAGGGAAGCGAATGGAAGCTGCGGG  
TGTGCCCTGGTTGGATGTGGAACGGTTTAGGCTGGTCCGCCGCTCAACGCGGGGCACTGGTCAGCGTGGGCCATCGCGGC  
GGGACAAGAGCAGGATGTAGTTTCTTGCCATGCCGTTGTGGTGGCCGAGGAACGAAGCATGCG-CCACTTGTGG-CGTG  
GTA--TTTATACCAACTGCATGCTCGGGACGCTGGCGTATTGAGCTCTTCATCCGACCCGCTCTTGAAACACGGACCAAGG  
AGTCTAACATGTATGCGAGCCGGTGGGCGGCAAACCCATTGAGGCGCAAGTAACTGACA-TTT?A-AAAATTTGGAAGT  
AATAAAATTAGTTGCTGATTGTATTGAAAAAATA-----TTT-----AGTATCA  
-----ACTC-----GATCA-----TT  
TAATTATTGAGTAAAAATTATTATCTTGAACCTTATTACTTATATATATATATATATATAT--AAGTATATAAAATAAAAAA-  
TTAAAAATTGTAACAAA-TAAATAT-----TTCTTATA-----GT  
ATAGAAAGATTCTAAAATTATAAAGTGATTAAAAATAAAAAAAAATTCCTG-----TTCACCTAAAAAAAAGAA  
ATTAGGCAATATTTTATTTTTTGTATTCTTTAATACGTTTTTAATTAATTTTATTTTATTAATTAGTTTAACATTCA  
AAAGATTATTAGGTCAATGCTTAGAAAAATAAAAAATAATTTACTAAAAATAATCTGAGTTGCATCAAATATAAAAAATA  
ATATACAATGATACTGTTTTGTTATAGGAAAA-TCAGTTTATCTAAAAAATAGACAAAATTAAATACCAAAGAAGTTTTT  
TTATAAGATT---AAAAGAAAAAAGTTATTTGTCGAGCAGACCTCATCCTTGCAAGAATTATCAATTGAG-AAAATTTTT  
AAAAAAAAAAAAAAT?AAAATATATA?T???AAAAATAAAAAAAAATAAAATAAA-CTTAAA---TAATTTGAGCTTTAGT  
AGAAAACTTACTAAATGCTAGCTTTCAGATTCAGGGAACTTAGGTTGAAAAAGTATAAGCAATCCTGAGCCAAATTT  
TATTCTTTAAAAATAAGATAGGTGCAGAGACTCAATGGAAGCTATCCTAACGAATAATATTTTAAGATTTTTTTT-AATTA  
AATAATTAATTAATAGAAATAAATTTAACTAAAATTTTATCTTTTATATATTAAGCGAGGATAAAGATAGAGTCCAATTT  
TACATGTTACTTTTAGCAACAATTTAAATTGTAGTAAAAAGAAAATCCGTTGGCTTTATTGACCGTGAGGGTTCAAGTCC  
CTCTACCCCCA-----AAAGT-----CTAA----CCTTTC-----TTTTATTGACATAAGCT  
CCTAGTTTATGTTACGATAGCCGAAACAAAACAA-TAAATAAAAAATTTAAATA

>P653

AAATCGTGGTGCCTTGCACCTCGAATTGTAGTCTGGAGAAGTGTCTCTGCAACGGACCAGACCCAAGTTCACCTGGAAG  
TGGCGTCAGAGAGGGTGAAAACCCCGTCGAGTCTGGACACTGTTGCAAAACGAGGCACTGTCTGCGAGTCGAGCTGTTTG

GGAATGCAGCTCTAAGTGGGTGGTAAATTCCATCCAAGGCTAAATATTGGCAAGAGACCGATAGCGAACAAGTACCGCGA  
GGGAAAGATGAAAAGGACTTTGAAAAGAGAGTTAAAAAGTGCTTGAAATTGCTGGGAGGGAAGCGAATGGAAGCTGCGGG  
TGTGCCCTGGTTGGATGTGGAACGGTTTAGGCTGGTCCGCCGCTCAACGCGGGGCACTGGTCAGCGTGGGCCATCGCGGC  
GGGACAAGAGCAGGATGTAGTTTCTTGCCATGCCGTTGTGGTGGCCGAGGAACGAAGCATGCG-CCACTTGTGG-CGTG  
GTA--TTTATACCAACTGCATGCTCGGGACGCTGGCGTATTGAGCTCTTCATCCGACCCGTCTTGAAACACGGACCAAGG  
AGTCTAACATGTATGCGAGCCGGTGGGCGGCAAACCCATTGAGGCGCAAGTAACTGACA-TTT?A-AAAATTTGGAAGT  
AATAAAATTAGTTGCTGATTGTATTGAAAAAATA-----TTT-----AGTATCA  
-----ACTC-----GATCA-----TT  
TAATTATTGAGTAAAAATTATTATCTTGAACCTTATTACTTATATATATATATATATATAT--AAGTATATAAAATAAAAAA-  
TTAAAAATTGTAACAAA-TAAATAT-----TTCTTATA-----GT  
ATAGAAAGATTCTAAAATTATAAAGTGATTAAAAATAAAAAAAATTCCTG-----TTCACCTAAAAAAAAGAA  
ATTAGGCAATATTTTATTTTTTGTATTCTTTAATACGTTTTTAATTAAATTTTATTTTATTAATTAGTTTAAACATTCA  
AAAGATTATTAGGTCAATGCTTAGAAAAATAAAAAATAATTTACTAAAAATAATCTGAGTTGCATCAAATATAAAAAATA  
ATATACAATGATACTGTTTTGTTATAGGAAAA-TCAGTTTATCTAAAAAATAGACAAAATTAAATACCAAAGAAGTTTTT  
TTATAAGATT---AAAAGAAAAAACTTATTTGTGCGAGCAGACCTCATCCTTGCAAGAATTATCAATTGAG-AAAATTTTT  
AAAAAAAAAAAAAAT?AAAATATATA?T???AAAATAAAAAAAAATAAAAAATAA-CTTAAA---TAATTTGAGCTTTAGT  
AGAAAACTTACTAAATGCTAGCTTTTTCAGATTCAGGGAACTTAGGTTGAAAAAGTATAAGCAATCCTGAGCCAAATTT  
TATTCCTTTAAAAATAAGATAGGTGCAGAGACTCAATGGAAGCTATCCTAACGAATAATATTTTAAGATTTTTTT-AATTA  
AATAATTAATTAATAGAAATAAATTTAACTAAAAATTTTATCTTTTATATATTAAGCGAGGATAAAGATAGAGTCCAATTT  
TACATGTTACTTTTAGCAACAATTTAAATTGTAGTAAAAAGAAAAATCCGTTGGCTTTATTGACCGTGAGGGTTCAAGTCC  
CTCTACCCCA-----AAAGT-----CTAA-----CCTTTC-----TTTTATTGACATAAGCT  
CCTAGTTTATGTTACGATAGCCGAAACAAAACAA-TAAATAAAAAATTTAAATA

>P654

AAATCGTGGTGCCTTGCACCTCGAATTGTAGTCTGGAGAAGTGTCTCTGCAACGGACCAGACCCAAAGTTCACCTGGAAG  
TGGCGTCAGAGAGGGTGAAAACCCCGTCGAGTCTGGACACTGTTGCAAAACGAGGCACTGTCTGCGAGTCGAGCTGTTTG  
GGAATGCAGCTCTAAGTGGGTGGTAAATTCCATCCAAGGCTAAATATTGGCAAGAGACCGATAGCGAACAAGTACCGCGA  
GGGAAAGATGAAAAGGACTTTGAAAAGAGAGTTAAAAAGTGCTTGAAATTGCTGGGAGGGAAGCGAATGGAAGCTGCGGG  
TGTGCCCTGGTTGGATGTGGAACGGTTTAGGCTGGTCCGCCGCTCAACGCGGGGCACTGGTCAGCGTGGGCCATCGCGGC  
GGGACAAGAGCAGGATGTAGTTTCTTGCCATGCCGTTGTGGTGGCCGAGGAACGAAGCATGCG-CCACTTGTGG-CGTG  
GTA--TTTATACCAACTGCATGCTCGGGACGCTGGCGTATTGAGCTCTTCATCCGACCCGTCTTGAAACACGGACCAAGG  
AGTCTAACATGTATGCGAGCCGGTGGGCGGCAAACCCATTGAGGCGCAAGTAACTGACA-TTT?A-AAAATTTGGAAGT  
AATAAAATTAGTTGCTGATTGTATTGAAAAAATA-----TTT-----AGTATCA  
-----ACTC-----GATCA-----TT  
TAATTATTGAGTAAAAATTATTATCTTGAACCTTATTACTTATATATATATATATATATATAT--AAGTATATAAAATAAAAAA-  
TTAAAAATTGTAACAAA-TAAATAT-----TTCTTATA-----GT  
ATAGAAAGATTCTAAAATTATAAAGTGATTAAAAATAAAAAAAATTCCTG-----TTCACCTAAAAAAAAGAA  
ATTAGGCAATATTTTATTTTTTGTATTCTTTAATACGTTTTTAATTAAATTTTATTTTATTAATTAGTTTAAACATTCA  
AAAGATTATTAGGTCAATGCTTAGAAAAATAAAAAATAATTTACTAAAAATAATCTGAGTTGCATCAAATATAAAAAATA  
ATATACAATGATACTGTTTTGTTATAGGAAAA-TCAGTTTATCTAAAAAATAGACAAAATTAAATACCAAAGAAGTTTTT  
TTATAAGATT---AAAAGAAAAAACTTATTTGTGCGAGCAGACCTCATCCTTGCAAGAATTATCAATTGAG-AAAATTTTT  
AAAAAAAAAAAAAAT?AAAATATATA?T???AAAATAAAAAAAAATAAAAAATAA-CTTAAA---TAATTTGAGCTTTAGT  
AGAAAACTTACTAAATGCTAGCTTTTTCAGATTCAGGGAACTTAGGTTGAAAAAGTATAAGCAATCCTGAGCCAAATTT  
TATTCCTTTAAAAATAAGATAGGTGCAGAGACTCAATGGAAGCTATCCTAACGAATAATATTTTAAGATTTTTTT-AATTA  
AATAATTAATTAATAGAAATAAATTTAACTAAAAATTTTATCTTTTATATATTAAGCGAGGATAAAGATAGAGTCCAATTT  
TACATGTTACTTTTAGCAACAATTTAAATTGTAGTAAAAAGAAAAATCCGTTGGCTTTATTGACCGTGAGGGTTCAAGTCC  
CTCTACCCCA-----AAAGT-----CTAA-----CCTTTC-----TTTTATTGACATAAGCT  
CCTAGTTTATGTTACGATAGCCGAAACAAAACAA-TAAATAAAAAATTTAAATA

>P655

AAATCGTGGTGCCTTGCACCTCGAATTGTAGTCTGGAGAAGTGTCTCTGCAACGGACCAGACCCAAAGTTCACCTGGAAG  
TGGCGTCAGAGAGGGTGAAAACCCCGTCGAGTCTGGACACTGTTGCAAAACGAGGCACTGTCTGCGAGTCGAGCTGTTTG  
GGAATGCAGCTCTAAGTGGGTGGTAAATTCCATCCAAGGCTAAATATTGGCAAGAGACCGATAGCGAACAAGTACCGCGA  
GGGAAAGATGAAAAGGACTTTGAAAAGAGAGTTAAAAAGTGCTTGAAATTGCTGGGAGGGAAGCGAATGGAAGCTGCGGG  
TGTGCCCTGGTTGGATGTGGAACGGTTTAGGCTGGTCCGCCGCTCAACGCGGGGCACTGGTCAGCGTGGGCCATCGCGGC  
GGGACAAGAGCAGGATGTAGTTTCTTGCCATGCCGTTGTGGTGGCCGAGGAACGAAGCATGCG-CCACTTGTGG-CGTG  
GTA--TTTATACCAACTGCATGCTCGGGACGCTGGCGTATTGAGCTCTTCATCCGACCCGTCTTGAAACACGGACCAAGG  
AGTCTAACATGTATGCGAGCCGGTGGGCGGCAAACCCATTGAGGCGCAAGTAACTGACA-TTT?A-AAAATTTGGAAGT  
AATAAAATTAGTTGCTGATTGTATTGAAAAAATA-----TTT-----AGTATCA  
-----ACTC-----GATCA-----TT



TAATTATTGAGTAAAAATTATTATCTTGAACCTATTACTTATATATATATATATATATAT--AAGTATATAAAAATAAAAAAA-  
TTAAAAATTGTAACAAA-TAAATAT-----TTCTTATA-----GT  
ATAGAAAGATTCTAAAATTATAAAGTGATTAAAATAAAAAAAAATTCTTG-----TTCACCTAAAAAAAAGAA  
ATTAGGCAATATTTTATTTTTTGTATTCTTTAATACGTTTTTAATTAAATTTTATTTTATTAATTAGTTTAAACATTCA  
AAAGATTATTAGGTCAATGCTTAGAAAAATAAAAAATAATTTACTAAAAATAATCTGAGTTGCATCAAATATAAAAAATA  
ATATACAATGATACTGTTTTGTTATAGGAAAA-TCAGTTTATCTAAAAAATAGACAAAATTAAATACCAAAGAAGTTTTT  
TTATAAGATT---AAAAGAAAAAACTTATTTGTCGAGCAGACCTCATCCTTGCAAGAATTATCAATTGAG-AAAATTTTT  
AAAAAAAAAAAAAAT?AAAATATATA?T??AAAATAAAAAAAAATAAAAAATAA-CTTAAA---TAATTTGAGCTTTAGT  
AGAAAACTTACTAAATGCTAGCTTTTTCAGATTCAGGGAACTTAGGTTGAAAAAGTATAAGCAATCCTGAGCCAAATTT  
TATTCCTTTAAAAATAAGATAGGTGCAGAGACTCAATGGAAGCTATCCTAACGAATAATATTTTAAGATTTTTTT-AATTA  
AATAATTAATTAATAGAAATAAATTTAACTAAAATTTTATCTTTTATATATTAAGCGAGGATAAAGATAGAGTCCAATTT  
TACATGTTACTTTTAGCAACAATTTAAATTGTAGTAAAAAGAAAAATCCGTTGGCTTTATTGACCGTGAGGGTTCAAGTCC  
CTCTACCCCCA-----AAAGT-----CTAA----CCTTTC-----TTTTATTGACATAAGCT  
CCTAGTTTATGTTACGATAGCCGAAACAAAACAA-TAAATAAAAAATTTAAATA

>P656

AAATCGTGGTGCCTTGCACCTCGAATTGTAGTCTGGAGAAGTGTCTCTGCAACGGACCAGACCCAAGTTCACCTGGAAAG  
TGGCGTCAGAGAGGGTGAAAACCCCGTCGAGTCTGGACACTGTTGCAAAACGAGGCACTGTCTGCGAGTCGAGCTGTTTG  
GGAATGCAGCTCTAAGTGGGTGGTAAATTCCATCCAAGGCTAAATATTGGCAAGAGACCGATAGCGAACAAGTACCGCGA  
GGGAAAGATGAAAAGGACTTTGAAAAGAGAGTTAAAAAGTGCTTGAAATTGCTGGGAGGGAAGCGAATGGAAGCTGCGGG  
TGTGCCCTGGTTGGATGTGGAACGGTTTAGGCTGGTCCGCCGCTCAACGCGGGGCACTGGTCAGCGTGGGCCATCGCGGC  
GGGACAAGAGCAGGATGTAGTTTCTTGCCATGCGGTTGTGGTGGCCGAGGAACGAAGCATGCG-CCACTTGTGG-CGTG  
GTA--TTTATACCAACTGCATGCTCGGGACGCTGGCGTATTGAGCTCTTCATCCGACCCGCTCTTGAAACACGGACCAAGG  
AGTCTAACATGTATGCGAGCCGGTGGGCGGCAAACCCATTGAGGCGCAAGTAACTGACA-TTT?A-AAAATTTGGAAGT  
AATAAAATTAGTTGCTGATTGTATTGAAAAAATA-----TTT-----AGTATCA  
-----ACTC-----GATCA-----TT  
TAATTATTGAGTAAAAATTATTATCTTGAACCTATTACTTATATATATATATATATATAT--AAGTATATAAAAATAAAAAAA-  
TTAAAAATTGTAACAAA-TAAATAT-----TTCTTATA-----GT  
ATAGAAAGATTCTAAAATTATAAAGTGATTAAAATAAAAAAAAATTCTTG-----TTCACCTAAAAAAAAGAA  
ATTAGGCAATATTTTATTTTTTGTATTCTTTAATACGTTTTTAATTAAATTTTATTTTATTAATTAGTTTAAACATTCA  
AAAGATTATTAGGTCAATGCTTAGAAAAATAAAAAATAATTTACTAAAAATAATCTGAGTTGCATCAAATATAAAAAATA  
ATATACAATGATACTGTTTTGTTATAGGAAAA-TCAGTTTATCTAAAAAATAGACAAAATTAAATACCAAAGAAGTTTTT  
TTATAAGATT---AAAAGAAAAAACTTATTTGTCGAGCAGACCTCATCCTTGCAAGAATTATCAATTGAG-AAAATTTTT  
AAAAAAAAAAAAAAT?AAAATATATA?T??AAAATAAAAAAAAATAAAAAATAA-CTTAAA---TAATTTGAGCTTTAGT  
AGAAAACTTACTAAATGCTAGCTTTTTCAGATTCAGGGAACTTAGGTTGAAAAAGTATAAGCAATCCTGAGCCAAATTT  
TATTCCTTTAAAAATAAGATAGGTGCAGAGACTCAATGGAAGCTATCCTAACGAATAATATTTTAAGATTTTTTT-AATTA  
AATAATTAATTAATAGAAATAAATTTAACTAAAATTTTATCTTTTATATATTAAGCGAGGATAAAGATAGAGTCCAATTT  
TACATGTTACTTTTAGCAACAATTTAAATTGTAGTAAAAAGAAAAATCCGTTGGCTTTATTGACCGTGAGGGTTCAAGTCC  
CTCTACCCCCA-----AAAGT-----CTAA----CCTTTC-----TTTTATTGACATAAGCT  
CCTAGTTTATGTTACGATAGCCGAAACAAAACAA-TAAATAAAAAATTTAAATA

>P657

AAATCGTGGTGCCTTGCACCTCGAATTGTAGTCTGGAGAAGTGTCTCTGCAACGGACCAGACCCAAGTTCACCTGGAAAG  
TGGCGTCAGAGAGGGTGAAAACCCCGTCGAGTCTGGACACTGTTGCAAAACGAGGCACTGTCTGCGAGTCGAGCTGTTTG  
GGAATGCAGCTCTAAGTGGGTGGTAAATTCCATCCAAGGCTAAATATTGGCAAGAGACCGATAGCGAACAAGTACCGCGA  
GGGAAAGATGAAAAGGACTTTGAAAAGAGAGTTAAAAAGTGCTTGAAATTGCTGGGAGGGAAGCGAATGGAAGCTGCGGG  
TGTGCCCTGGTTGGATGTGGAACGGTTTAGGCTGGTCCGCCGCTCAACGCGGGGCACTGGTCAGCGTGGGCCATCGCGGC  
GGGACAAGAGCAGGATGTAGTTTCTTGCCATGCGGTTGTGGTGGCCGAGGAACGAAGCATGCG-CCACTTGTGG-CGTG  
GTA--TTTATACCAACTGCATGCTCGGGACGCTGGCGTATTGAGCTCTTCATCCGACCCGCTCTTGAAACACGGACCAAGG  
AGTCTAACATGTATGCGAGCCGGTGGGCGGCAAACCCATTGAGGCGCAAGTAACTGACA-TTT?A-AAAATTTGGAAGT  
AATAAAATTAGTTGCTGATTGTATTGAAAAAATA-----TTT-----AGTATCA  
-----ACTC-----GATCA-----TT  
TAATTATTGAGTAAAAATTATTATCTTGAACCTATTACTTATATATATATATATATATAT--AAGTATATAAAAATAAAAAAA-  
TTAAAAATTGTAACAAA-TAAATAT-----TTCTTATA-----GT  
ATAGAAAGATTCTAAAATTATAAAGTGATTAAAATAAAAAAAAATTCTTG-----TTCACCTAAAAAAAAGAA  
ATTAGGCAATATTTTATTTTTTGTATTCTTTAATACGTTTTTAATTAAATTTTATTTTATTAATTAGTTTAAACATTCA  
AAAGATTATTAGGTCAATGCTTAGAAAAATAAAAAATAATTTACTAAAAATAATCTGAGTTGCATCAAATATAAAAAATA  
ATATACAATGATACTGTTTTGTTATAGGAAAA-TCAGTTTATCTAAAAAATAGACAAAATTAAATACCAAAGAAGTTTTT  
TTATAAGATT---AAAAGAAAAAACTTATTTGTCGAGCAGACCTCATCCTTGCAAGAATTATCAATTGAG-AAAATTTTT  
AAAAAAAAAAAAAAT?AAAATATATA?T??AAAATAAAAAAAAATAAAAAATAA-CTTAAA---TAATTTGAGCTTTAGT

AGAAAACTTACTAAATGCTAGCTTTCAGATTCAGGGAACTTAGGTTGAAAAAGTATAAGCAATCCTGAGCCAAATTT  
TATTCCTTTAAAAATAAGATAGGTGCAGAGACTCAATGGAAGCTATCCTAACGAATAATATTTTAAGATTTTTTTT-AATTA  
AATAATTAATTAATAGAAATAAATTTAACTAAAATTTTATCTTTTATATATTAAGCGAGGATAAAGATAGAGTCCAATTT  
TACATGTTACTTTTAGCAACAATTTAAATTGTAGTAAAAAGAAAATCCGTTGGCTTTATTGACCGTGAGGGTTCAAGTCC  
CTCTACCCCCA-----AAAGT-----CTAA----CCTTTC-----TTTTATTGACATAAGCT  
CCTAGTTTATGTTACGATAGCCGAAACAAAACAA-TAAATAAAAAATTTAAATA

>P658

AAATCGTGGTGCCTTGCACCTCGAATTGTAGTCTGGAGAAGTGTCTCTGCAACGGACCAGACCCAAGTTCACCTGGAAG  
TGGCGTCAGAGAGGGTGAAAACCCCGTCGAGTCTGGACACTGTTGCAAAACGAGGCACTGTCTGCGAGTCGAGCTGTTTG  
GGAATGCAGCTCTAAGTGGGTGGTAAATTCCATCCAAGGCTAAATATTGGCAAGAGACCGATAGCGAACAAGTACCGCGA  
GGGAAAGATGAAAAGGACTTTGAAAAGAGAGTTAAAAAGTGCTTGAAATTGCTGGGAGGGAAGCGAATGGAAGCTGCGGG  
TGTGCCCTGGTTGGATGTGGAACGGTTTAGGCTGGTCCGCCGCTCAACGCGGGGCACTGGTCAGCGTGGGCCATCGCGGC  
GGGACAAGAGCAGGATGTAGTTTCTTGCCATGCCGTTGTGGTGGCCGAGGAACGAAGCATGCG-CCACTTGTGG-CGTG  
GTA--TTTATACCAACTGCATGCTCGGGACGCTGGCGTATTGAGCTCTTCATCCGACCCGCTCTTGAAACACGGACCAAGG  
AGTCTAACATGTATGCGAGCCGGTGGGCGGCAAACCCATTGAGGCGCAAGTAACTGACA-TTT?A-AAAATTTGGAAGT  
AATAAAATTAGTTGCTGATTGTATTGAAAAAATA-----TTT-----AGTATCA  
-----ACTC-----GATCA-----TT  
TAATTATTGAGTAAAAATTATTATCTTGAACCTTATTACTTATATATATATATATATAT--AAGTATATAAAATAAAAAA-  
TTAAAAATTGTAACAAA-TAAATAT-----TTCTTATA-----GT  
ATAGAAAGATTCTAAAATTATAAAGTGATTAAAAATAAAAAAAATTCCTG-----TTCACCTAAAAAAAAGAA  
ATTAGGCAATATTTTATTTTTTGTATTCTTTAATACGTTTTTAATTAATTTTATTTTATTAATTAGTTTAACATTCA  
AAAGATTATTAGGTCAATGCTTAGAAAAATAAAAAATAATTTACTAAAAATAATCTGAGTTGCATCAATATAAAAAATA  
ATATACAATGATACTGTTTTGTTATAGGAAAA-TCAGTTTATCTAAAAATAGACAAAATTAAATACCAAAGAAGTTTTT  
TTATAAGATT---AAAAGAAAAAACTTATTTGTCGAGCAGACCTCATCCTTGCAAGAATTATCAATTGAG-AAAATTTTT  
AAAAAAAAAAAAAT?AAAATATATA?T???AAAATAAAAAAAATAAAAAATAA-CTTAAA---TAATTTGAGCTTTAGT  
AGAAAACTTACTAAATGCTAGCTTTCAGATTCAGGGAACTTAGGTTGAAAAAGTATAAGCAATCCTGAGCCAAATTT  
TATTCCTTTAAAAATAAGATAGGTGCAGAGACTCAATGGAAGCTATCCTAACGAATAATATTTTAAGATTTTTTTT-AATTA  
AATAATTAATTAATAGAAATAAATTTAACTAAAATTTTATCTTTTATATATTAAGCGAGGATAAAGATAGAGTCCAATTT  
TACATGTTACTTTTAGCAACAATTTAAATTGTAGTAAAAAGAAAATCCGTTGGCTTTATTGACCGTGAGGGTTCAAGTCC  
CTCTACCCCCA-----AAAGT-----CTAA----CCTTTC-----TTTTATTGACATAAGCT  
CCTAGTTTATGTTACGATAGCCGAAACAAAACAA-TAAATAAAAAATTTAAATA

>P659

AAATCGTGGTGCCTTGCACCTCGAATTGTAGTCTGGAGAAGTGTCTCTGCAACGGACCAGACCCAAGTTCACCTGGAAG  
TGGCGTCAGAGAGGGTGAAAACCCCGTCGAGTCTGGACACTGTTGCAAAACGAGGCACTGTCTGCGAGTCGAGCTGTTTG  
GGAATGCAGCTCTAAGTGGGTGGTAAATTCCATCCAAGGCTAAATATTGGCAAGAGACCGATAGCGAACAAGTACCGCGA  
GGGAAAGATGAAAAGGACTTTGAAAAGAGAGTTAAAAAGTGCTTGAAATTGCTGGGAGGGAAGCGAATGGAAGCTGCGGG  
TGTGCCCTGGTTGGATGTGGAACGGTTTAGGCTGGTCCGCCGCTCAACGCGGGGCACTGGTCAGCGTGGGCCATCGCGGC  
GGGACAAGAGCAGGATGTAGTTTCTTGCCATGCCGTTGTGGTGGCCGAGGAACGAAGCATGCG-CCACTTGTGG-CGTG  
GTA--TTTATACCAACTGCATGCTCGGGACGCTGGCGTATTGAGCTCTTCATCCGACCCGCTCTTGAAACACGGACCAAGG  
AGTCTAACATGTATGCGAGCCGGTGGGCGGCAAACCCATTGAGGCGCAAGTAACTGACA-TTT?A-AAAATTTGGAAGT  
AATAAAATTAGTTGCTGATTGTATTGAAAAAATA-----TTT-----AGTATCA  
-----ACTC-----GATCA-----TT  
TAATTATTGAGTAAAAATTATTATCTTGAACCTTATTACTTATATATATATATATATATAT--AAGTATATAAAATAAAAAA-  
TTAAAAATTGTAACAAA-TAAATAT-----TTCTTATA-----GT  
ATAGAAAGATTCTAAAATTATAAAGTGATTAAAAATAAAAAAAATTCCTG-----TTCACCTAAAAAAAAGAA  
ATTAGGCAATATTTTATTTTTTGTATTCTTTAATACGTTTTTAATTAATTTTATTTTATTAATTAGTTTAACATTCA  
AAAGATTATTAGGTCAATGCTTAGAAAAATAAAAAATAATTTACTAAAAATAATCTGAGTTGCATCAATATAAAAAATA  
ATATACAATGATACTGTTTTGTTATAGGAAAA-TCAGTTTATCTAAAAATAGACAAAATTAAATACCAAAGAAGTTTTT  
TTATAAGATT---AAAAGAAAAAACTTATTTGTCGAGCAGACCTCATCCTTGCAAGAATTATCAATTGAG-AAAATTTTT  
AAAAAAAAAAAAAT?AAAATATATA?T???AAAATAAAAAAAATAAAAAATAA-CTTAAA---TAATTTGAGCTTTAGT  
AGAAAACTTACTAAATGCTAGCTTTCAGATTCAGGGAACTTAGGTTGAAAAAGTATAAGCAATCCTGAGCCAAATTT  
TATTCCTTTAAAAATAAGATAGGTGCAGAGACTCAATGGAAGCTATCCTAACGAATAATATTTTAAGATTTTTTTT-AATTA  
AATAATTAATTAATAGAAATAAATTTAACTAAAATTTTATCTTTTATATATTAAGCGAGGATAAAGATAGAGTCCAATTT  
TACATGTTACTTTTAGCAACAATTTAAATTGTAGTAAAAAGAAAATCCGTTGGCTTTATTGACCGTGAGGGTTCAAGTCC  
CTCTACCCCCA-----AAAGT-----CTAA----CCTTTC-----TTTTATTGACATAAGCT  
CCTAGTTTATGTTACGATAGCCGAAACAAAACAA-TAAATAAAAAATTTAAATA

>P661

AAATCGTGGTGCCTTGCACCTCGAATTGTAGTCTGGAGAAGTGTCTCTGCAACGGACCAGACCCAAGTTCACCTGGAAG

>P662

>P663

AAATCGTGGTGCCTTGCACCTCGAATTGTAGTCTGGAGAAGTGTCTCTGCAACGGACCAGACCCAAGTTCACTGGAAG  
TGGCGTCAGAGAGGGTGAAAACCCCGTCGAGTCTGGACACTGTTGCAAAACGAGGCACTGTCTGCGAGTCGAGCTGTTTG  
GGAATGCAGCTCTAAGTGGGTGGTAAATTCCATCCAAGGCTAAATATTGGCAAGAGACCGATAGCGAAACAAGTACCGCGA  
GGGAAAGATGAAAAGGACTTTGAAAAGAGAGTTAAAAAGTGCTTGAAATTGCTGGGAGGGAAGCGAATGGAAGCTGCGGG  
TGTGCCCTGGTTGGATGTGGAACGTTTTAGGCTGGTCCGCCGCTCAACGCGGGGCACTGGTCAGCGTGGGCCATCGCGGC  
GGGACAAGAGCAGGATGTAGTTTCTTGCCATGCCGTTGTGGTGGCCGAGGAACGAAGCATGCG-CCACTTGTGG-CGTG  
GTA--TTTATACCAACTGCATGCTCGGGACGCTGGCGTATTGAGCTCTTCATCCGACCCGCTTTGAAACACGGACCAAGG  
AGTCTAACATGTATGCGAGCCGGTGGGCGGCAAAACCCATTGAGGCGCAAGTAAACTGACA-TTT?A-AAAATTTGGAAGT  
AATAAAATTAGTTGCTGATTGTATTGAAAAAATA-----TTT-----AGTATCA

-----ACTC-----GATCA-----TT  
TAATTATTGAGTAAAAATTATTATCTTGAACCTTATTACTTATATATATATATATATATAT--AAGTATATAAAATAAAAAA-  
TTAAAAATTGTAACAAA-TAAATAT-----TTCTTATA-----GT  
ATAGAAAGATTCTAAAATTATAAAGTGATTAAAAATAAAAAAAAATTCTTG-----TTCACCTAAAAAAAAGAA  
ATTAGGCAATATTTTATTTTTTGTATTCTTTAATACGTTTTTAATTAAATTTTATTTTTTATTAATTAGTTTAAACATTCA  
AAAGATTATTAGGTCAATGCTTAGAAAAATAAAAAATAATTTACTAAAAATAATCTGAGTTGCATCAAATATAAAAAATA  
ATATACAATGATACTGTTTTGTTATAGGAAAA-TCAGTTTATCTAAAAAATAGACAAAATTAAATACCAAAGAAGTTTTT  
TTATAAGATT---AAAAGAAAAAACTTATTTGTCGAGCAGACCTCATCCTTGCAAGAATTATCAATTGAG-AAAATTTTT  
AAAAAAAAAAAAAAT?AAAATATATA?T??AAAAATAAAAAAAAATAAAAAATAA-CTTAAA---TAATTTGAGCTTTAGT  
AGAAAACTTACTAAATGCTAGCTTTTTCAGATTTCAGGGAACTTAGGTTGAAAAAGTATAAGCAATCCTGAGCCAAATTT  
TATTCCTTTAAAAATAAGATAGGTGCAGAGACTCAATGGAAGCTATCCTAACGAATAATATTTTAAGATTTTTTTT-AATTA  
AATAATTAATTAATAGAAATAAATTTAACTAAAAATTTTATCTTTTATATATTAAGCGAGGATAAAGATAGAGTCCAATTT  
TACATGTTACTTTTGTAGCAACAATTTAAATTGTAGTAAAAAGAAAAATCCGTTGGCTTTATTGACCGTGAGGGTTCAAGTCC  
CTCTACCCCCA-----AAAGT-----CTAA----CCTTTC-----TTTTTATTGACATAAGCT  
CCTAGTTTATGTTACGATAGCCGAAACAAAACAA-TAAATAAAAAATTTAAATA

>P664

AAATCGTGGTGCCTTGCACCTCGAATTGTAGTCTGGAGAAGTGTCTCTGCAACGGACCAGACCCAAGTTCACCTGGAAG  
TGGCGTCAGAGAGGGTGAAAACCCCGTCGAGTCTGGACACTGTTGCAAAACGAGGCACTGTCTGCGAGTCGAGCTGTTTG  
GGAATGCAGCTCTAAGTGGGTGGTAAATTCCATCCAAGGCTAAATATTGGCAAGAGACCGATAGCGAACAAGTACCGCGA  
GGGAAAGATGAAAAGGACTTTGAAAAGAGAGTTAAAAAGTGCTTGAAATTGCTGGGAGGGAAGCGAATGGAAGCTGCGGG  
TGTGCCCTGGTTGGATGTGGAACGGTTTAGGCTGGTCCGCCGCTCAACGCGGGGCACTGGTCAGCGTGGGCCATCGCGGC  
GGGACAAGAGCAGGATGTAGTTTCTTGCCATGCGGTTGTGGTGGCCGAGGAACGAAGCATGCG-CCACTTGTGG-CGTG  
GTA--TTTATACCAACTGCATGCTCGGGACGCTGGCGTATTGAGCTCTTCATCCGACCCGCTCTTGAAACACGGACCAAGG  
AGTCTAACATGTATGCGAGCCGGTGGGCGGCAAACCCATTGAGGCGCAAGTAACTGACA-TTT?A-AAAATTTGGAAGT  
AATAAAATTAGTTGCTGATTGTATTGAAAAAATA-----TTT-----AGTATCA

-----ACTC-----GATCA-----TT  
TAATTATTGAGTAAAAATTATTATCTTGAACCTTATTACTTATATATATATATATATATAT--AAGTATATAAAATAAAAAA-  
TTAAAAATTGTAACAAA-TAAATAT-----TTCTTATA-----GT  
ATAGAAAGATTCTAAAATTATAAAGTGATTAAAAATAAAAAAAAATTCTTG-----TTCACCTAAAAAAAAGAA  
ATTAGGCAATATTTTATTTTTTGTATTCTTTAATACGTTTTTAATTAAATTTTATTTTTTATTAATTAGTTTAAACATTCA  
AAAGATTATTAGGTCAATGCTTAGAAAAATAAAAAATAATTTACTAAAAATAATCTGAGTTGCATCAAATATAAAAAATA  
ATATACAATGATACTGTTTTGTTATAGGAAAA-TCAGTTTATCTAAAAAATAGACAAAATTAAATACCAAAGAAGTTTTT  
TTATAAGATT---AAAAGAAAAAACTTATTTGTCGAGCAGACCTCATCCTTGCAAGAATTATCAATTGAG-AAAATTTTT  
AAAAAAAAAAAAAAT?AAAATATATA?T??AAAAATAAAAAAAAATAAAAAATAA-CTTAAA---TAATTTGAGCTTTAGT  
AGAAAACTTACTAAATGCTAGCTTTTTCAGATTTCAGGGAACTTAGGTTGAAAAAGTATAAGCAATCCTGAGCCAAATTT  
TATTCCTTTAAAAATAAGATAGGTGCAGAGACTCAATGGAAGCTATCCTAACGAATAATATTTTAAGATTTTTTTT-AATTA  
AATAATTAATTAATAGAAATAAATTTAACTAAAAATTTTATCTTTTATATATTAAGCGAGGATAAAGATAGAGTCCAATTT  
TACATGTTACTTTTGTAGCAACAATTTAAATTGTAGTAAAAAGAAAAATCCGTTGGCTTTATTGACCGTGAGGGTTCAAGTCC  
CTCTACCCCCA-----AAAGT-----CTAA----CCTTTC-----TTTTTATTGACATAAGCT  
CCTAGTTTATGTTACGATAGCCGAAACAAAACAA-TAAATAAAAAATTTAAATA

>P665

AAATCGTGGTGCCTTGCACCTCGAATTGTAGTCTGGAGAAGTGTCTCTGCAACGGACCAGACCCAAGTTCACCTGGAAG  
TGGCGTCAGAGAGGGTGAAAACCCCGTCGAGTCTGGACACTGTTGCAAAACGAGGCACTGTCTGCGAGTCGAGCTGTTTG  
GGAATGCAGCTCTAAGTGGGTGGTAAATTCCATCCAAGGCTAAATATTGGCAAGAGACCGATAGCGAACAAGTACCGCGA  
GGGAAAGATGAAAAGGACTTTGAAAAGAGAGTTAAAAAGTGCTTGAAATTGCTGGGAGGGAAGCGAATGGAAGCTGCGGG  
TGTGCCCTGGTTGGATGTGGAACGGTTTAGGCTGGTCCGCCGCTCAACGCGGGGCACTGGTCAGCGTGGGCCATCGCGGC  
GGGACAAGAGCAGGATGTAGTTTCTTGCCATGCGGTTGTGGTGGCCGAGGAACGAAGCATGCG-CCACTTGTGG-CGTG  
GTA--TTTATACCAACTGCATGCTCGGGACGCTGGCGTATTGAGCTCTTCATCCGACCCGCTCTTGAAACACGGACCAAGG  
AGTCTAACATGTATGCGAGCCGGTGGGCGGCAAACCCATTGAGGCGCAAGTAACTGACA-TTT?A-AAAATTTGGAAGT  
AATAAAATTAGTTGCTGATTGTATTGAAAAAATA-----TTT-----AGTATCA

-----ACTC-----GATCA-----TT  
TAATTATTGAGTAAAAATTATTATCTTGAACCTTATTACTTATATATATATATATATATAT--AAGTATATAAAATAAAAAA-  
TTAAAAATTGTAACAAA-TAAATAT-----TTCTTATA-----GT  
ATAGAAAGATTCTAAAATTATAAAGTGATTAAAAATAAAAAAAAATTCTTG-----TTCACCTAAAAAAAAGAA  
ATTAGGCAATATTTTATTTTTTGTATTCTTTAATACGTTTTTAATTAAATTTTATTTTTTATTAATTAGTTTAAACATTCA  
AAAGATTATTAGGTCAATGCTTAGAAAAATAAAAAATAATTTACTAAAAATAATCTGAGTTGCATCAAATATAAAAAATA  
ATATACAATGATACTGTTTTGTTATAGGAAAA-TCAGTTTATCTAAAAAATAGACAAAATTAAATACCAAAGAAGTTTTT  
TTATAAGATT---AAAAGAAAAAACTTATTTGTCGAGCAGACCTCATCCTTGCAAGAATTATCAATTGAG-AAAATTTTT

AAAAAAAAAAAAAAT?AAAATATATA?T???AAAATAAAAAAAAAAATAAAATAAA-CTTAAA---TAATTTGAGCTTTAGT  
AGAAAAACTTACTAAATGCTAGCTTTTCAGATTTCAGGGAACTTAGGTTGAAAAAGTATAAGCAATCCTGAGCCAAATTT  
TATTCCTTTAAAAATAAGATAGGTGCAGAGACTCAATGGAAGCTATCCTAACGAATAATATTTTAAGATTTTTTTT-AATTA  
AATAATTAATTAATAGAAATAAATTTAACTAAAATTTTATCTTTTATATATTAAGCGAGGATAAAGATAGAGTCCAATTT  
TACATGTTACTTTTAGCAACAATTTAAATTGTAGTAAAAAGAAAATCCGTTGGCTTTATTGACCGTGAGGGTTCAAGTCC  
CTCTACCCCCA-----AAAGT-----CTAA----CCTTTC-----TTTTATTGACATAAGCT  
CCTAGTTTATGTTACGATAGCCGAAACAAAACAA-TAAATAAAAAATTTAAATA

>P666

AAATCGTGGTGCCTTGCACCTCGAATTGTAGTCTGGAGAAGTGTCTCTGCAACGGACCAGACCCAAGTTCACCTGGAAG  
TGGCGTCAGAGAGGGTGAAAACCCCGTCGAGTCTGGACACTGTTGCAAAACGAGGCACTGTCTGCGAGTCGAGCTGTTTG  
GGAATGCAGCTCTAAGTGGGTGGTAAATTCCATCCAAGGCTAAATATTGGCAAGAGACCGATAGCGAACAAGTACCGCGA  
GGGAAAGATGAAAAGGACTTTGAAAAGAGAGTTAAAAAGTGCTTGAAATTGCTGGGAGGGAAGCGAATGGAAGCTGCGGG  
TGTGCCCTGGTTGGATGTGGAACGGTTTAGGCTGGTCCGCCGCTCAACGCGGGGCACTGGTCAGCGTGGGCCATCGCGGC  
GGGACAAGAGCAGGATGTAGTTTCTTGCCATGCCGTTGTGGTGGCCGAGGAACGAAGCATGCG-CCACTTGTGG-CGTG  
GTA--TTTATACCAACTGCATGCTCGGGACGCTGGCGTATTGAGCTCTTCATCCGACCCGCTCTTGAAACACGGACCAAGG  
AGTCTAACATGTATGCGAGCCGGTGGGCGGCAAACCCATTGAGGCGCAAGTAACTGACA-TTT?A-AAAATTTGGAAGT  
AATAAAATTAGTTGCTGATTGTATTGAAAAAATA-----TTT-----AGTATCA  
-----ACTC-----GATCA-----TT  
TAATTATTGAGTAAAAATTATTATCTTGAACCTTATTACTTATATATATATATATATAT--AAGTATATAAAATAAAAAA-  
TTAAAAATTGTAACAAA-TAAATAT-----TTCTTATA-----GT  
ATAGAAAGATTCTAAAATTATAAAGTGATTAAAAATAAAAAAAATTTCTTG-----TTCACTTAAAAAAAAGAA  
ATTAGGCAATATTTTATTTTTTGTATTCTTTAATACGTTTTTAATTAATTTTATTTTATTAATTAGTTTAACATTCA  
AAAGATTATTAGGTCAATGCTTAGAAAAATAAAAAATAATTTACTAAAAATAATCTGAGTTGCATCAAATATAAAAAATA  
ATATACAATGATACTGTTTTGTTATAGGAAAA-TCAGTTTATCTAAAAATAGACAAAATTAAATACCAAAGAAGTTTTT  
TTATAAGATT---AAAAGAAAAAATTTTGTGCGAGCAGACCTCATCCTTGCAAGAATTATCAATTGAG-AAAATTTTT  
AAAAAAAAAAAAAAT?AAAATATATA?T???AAAATAAAAAAAAAAATAAAATAAA-CTTAAA---TAATTTGAGCTTTAGT  
AGAAAAACTTACTAAATGCTAGCTTTTCAGATTTCAGGGAACTTAGGTTGAAAAAGTATAAGCAATCCTGAGCCAAATTT  
TATTCCTTTAAAAATAAGATAGGTGCAGAGACTCAATGGAAGCTATCCTAACGAATAATATTTTAAGATTTTTTTT-AATTA  
AATAATTAATTAATAGAAATAAATTTAACTAAAATTTTATCTTTTATATATTAAGCGAGGATAAAGATAGAGTCCAATTT  
TACATGTTACTTTTAGCAACAATTTAAATTGTAGTAAAAAGAAAATCCGTTGGCTTTATTGACCGTGAGGGTTCAAGTCC  
CTCTACCCCCA-----AAAGT-----CTAA----CCTTTC-----TTTTATTGACATAAGCT  
CCTAGTTTATGTTACGATAGCCGAAACAAAACAA-TAAATAAAAAATTTAAATA

>P667

AAATCGTGGTGCCTTGCACCTCGAATTGTAGTCTGGAGAAGTGTCTCTGCAACGGACCAGACCCAAGTTCACCTGGAAG  
TGGCGTCAGAGAGGGTGAAAACCCCGTCGAGTCTGGACACTGTTGCAAAACGAGGCACTGTCTGCGAGTCGAGCTGTTTG  
GGAATGCAGCTCTAAGTGGGTGGTAAATTCCATCCAAGGCTAAATATTGGCAAGAGACCGATAGCGAACAAGTACCGCGA  
GGGAAAGATGAAAAGGACTTTGAAAAGAGAGTTAAAAAGTGCTTGAAATTGCTGGGAGGGAAGCGAATGGAAGCTGCGGG  
TGTGCCCTGGTTGGATGTGGAACGGTTTAGGCTGGTCCGCCGCTCAACGCGGGGCACTGGTCAGCGTGGGCCATCGCGGC  
GGGACAAGAGCAGGATGTAGTTTCTTGCCATGCCGTTGTGGTGGCCGAGGAACGAAGCATGCG-CCACTTGTGG-CGTG  
GTA--TTTATACCAACTGCATGCTCGGGACGCTGGCGTATTGAGCTCTTCATCCGACCCGCTCTTGAAACACGGACCAAGG  
AGTCTAACATGTATGCGAGCCGGTGGGCGGCAAACCCATTGAGGCGCAAGTAACTGACA-TTT?A-AAAATTTGGAAGT  
AATAAAATTAGTTGCTGATTGTATTGAAAAAATA-----TTT-----AGTATCA  
-----ACTC-----GATCA-----TT  
TAATTATTGAGTAAAAATTATTATCTTGAACCTTATTACTTATATATATATATATATATAT--AAGTATATAAAATAAAAAA-  
TTAAAAATTGTAACAAA-TAAATAT-----TTCTTATA-----GT  
ATAGAAAGATTCTAAAATTATAAAGTGATTAAAAATAAAAAAAATTTCTTG-----TTCACTTAAAAAAAAGAA  
ATTAGGCAATATTTTATTTTTTGTATTCTTTAATACGTTTTTAATTAATTTTATTTTATTAATTAGTTTAACATTCA  
AAAGATTATTAGGTCAATGCTTAGAAAAATAAAAAATAATTTACTAAAAATAATCTGAGTTGCATCAAATATAAAAAATA  
ATATACAATGATACTGTTTTGTTATAGGAAAA-TCAGTTTATCTAAAAATAGACAAAATTAAATACCAAAGAAGTTTTT  
TTATAAGATT---AAAAGAAAAAATTTTGTGCGAGCAGACCTCATCCTTGCAAGAATTATCAATTGAG-AAAATTTTT  
AAAAAAAAAAAAAAT?AAAATATATA?T???AAAATAAAAAAAAAAATAAAATAAA-CTTAAA---TAATTTGAGCTTTAGT  
AGAAAAACTTACTAAATGCTAGCTTTTCAGATTTCAGGGAACTTAGGTTGAAAAAGTATAAGCAATCCTGAGCCAAATTT  
TATTCCTTTAAAAATAAGATAGGTGCAGAGACTCAATGGAAGCTATCCTAACGAATAATATTTTAAGATTTTTTTT-AATTA  
AATAATTAATTAATAGAAATAAATTTAACTAAAATTTTATCTTTTATATATTAAGCGAGGATAAAGATAGAGTCCAATTT  
TACATGTTACTTTTAGCAACAATTTAAATTGTAGTAAAAAGAAAATCCGTTGGCTTTATTGACCGTGAGGGTTCAAGTCC  
CTCTACCCCCA-----AAAGT-----CTAA----CCTTTC-----TTTTATTGACATAAGCT  
CCTAGTTTATGTTACGATAGCCGAAACAAAACAA-TAAATAAAAAATTTAAATA

>P668

>P669

>P670

AGTCTAACATGTATGCGAGCCGGTGGGCGGCAAACCCATTGAGGCGCAAGTAAACTGACA-TTT?A-AAAATTTGGAAGT

AATAAAATTAGTTGCTGATTGTATTGAAAAAATA-----TTT-----AGTATCA  
-----ACTC-----GATCA-----TT  
TAATTATTGAGTAAAAATTATTATCTTGAACCTATTACTTATATATATATATATATAT--AAGTATATAAAATAAAAAAA-  
TTAAAAATTGTAACAAA-TAAATAT-----TTCTTATA-----GT  
ATAGAAAGATTCTAAAATTATAAAGTGATTAAAATAAAAAAAAATTCTTG-----TTCACCTAAAAAAAAGAA  
ATTAGGCAATATTTTATTTTTTGTATTCTTTAATACGTTTTTAATTAAATTTTATTTTTTATTAATTAGTTTAAACATTCA  
AAAGATTATTAGGTCAATGCTTAGAAAAATAAAAAATAATTTACTAAAAATAATCTGAGTTGCATCAAATATAAAAAATA  
ATATACAATGATACTGTTTTGTTATAGGAAAA-TCAGTTTATCTAAAAAATAGACAAAATTAAATACCAAAGAAGTTTTT  
TTATAAGATT---AAAAGAAAAAACTTATTTGTCGAGCAGACCTCATCCTTGCAAGAATTATCAATTGAG-AAAATTTTT  
AAAAAAAAAAAAAAT?AAAATATATA?T??T?AAAATAAAAAAAAATAAAAAATAA-CTTAAA---TAATTTGAGCTTTAGT  
AGAAAACTTACTAAATGCTAGCTTTTTCAGATTCAGGGAACTTAGGTTGAAAAAGTATAAGCAATCCTGAGCCAAATTT  
TATTCCTTTAAAAATAAGATAGGTGCAGAGACTCAATGGAAGCTATCCTAACGAATAATATTTTAAAGATTTTTTT-AATTA  
AATAATTAATTAATAGAAATAAATTTAACTAAAAATTTTATCTTTTATATATTAAGCGAGGATAAAGATAGAGTCCAATTT  
TACATGTTACTTTTTAGCAACAATTTAAATTGTAGTAAAAAGAAAAATCCGTTGGCTTTATTGACCGTGAGGGTTCAAGTCC  
CTCTACCCCCA-----AAAGT-----CTAA-----CCTTTC-----TTTTTATTGACATAAGCT  
CCTAGTTTATGTTACGATAGCCGAAACAAAACAA-TAAATAAAAAATTTAAATA

>P671

AAATCGTGGTGCCTTGACCTCGAATTGTAGTCTGGAGAAGTGTCTCTGCAACGGACCAGACCCAAGTTCACCTGGAAG  
TGGCGTCAGAGAGGGTGAAAACCCCGTCGAGTCTGGACACTGTTGCAAAACGAGGCACTGTCTGCGAGTCGAGCTGTTTG  
GGAATGCAGCTCTAAGTGGGTGGTAAATTCATCCAAGGCTAAATATTGGCAAGAGACCGATAGCGAACAAGTACCGCGA  
GGGAAAGATGAAAAGGACTTTGAAAAGAGAGTTAAAAAGTGCTTGAAATTGCTGGGAGGGAAGCGAATGGAAGCTGCGGG  
TGTGCCCTGGTTGGATGTGGAACGGTTTAGGCTGGTCCGCCGCTCAACGCGGGGCACTGGTCAGCGTGCGGCCATCGCGGC  
GGGACAAGAGCAGGATGTAGTTTCTTGCCATGCGGTTGTGGTGGCCGAGGAACGAAGCATGCG-CCACTTGTGG-CGTG  
GTA--TTTATACCAACTGCATGCTCGGGACGCTGGCGTATTGAGCTCTTCATCCGACCCGCTCTTGAAACACGGACCAAGG  
AGTCTAACATGTATGCGAGCCGGTGGGCGGCAAACCCATTGAGGCGCAAGTAACTGACA-TTT?A-AAAATTTGGAAGT  
AATAAAATTAGTTGCTGATTGTATTGAAAAAATA-----TTT-----AGTATCA  
-----ACTC-----GATCA-----TT  
TAATTATTGAGTAAAAATTATTATCTTGAACCTATTACTTATATATATATATATATATAT--AAGTATATAAAATAAAAAAA-  
TTAAAAATTGTAACAAA-TAAATAT-----TTCTTATA-----GT  
ATAGAAAGATTCTAAAATTATAAAGTGATTAAAATAAAAAAAAATTCTTG-----TTCACCTAAAAAAAAGAA  
ATTAGGCAATATTTTATTTTTTGTATTCTTTAATACGTTTTTAATTAAATTTTATTTTTTATTAATTAGTTTAAACATTCA  
AAAGATTATTAGGTCAATGCTTAGAAAAATAAAAAATAATTTACTAAAAATAATCTGAGTTGCATCAAATATAAAAAATA  
ATATACAATGATACTGTTTTGTTATAGGAAAA-TCAGTTTATCTAAAAAATAGACAAAATTAAATACCAAAGAAGTTTTT  
TTATAAGATT---AAAAGAAAAAACTTATTTGTCGAGCAGACCTCATCCTTGCAAGAATTATCAATTGAG-AAAATTTTT  
AAAAAAAAAAAAAAT?AAAATATATA?T??T?AAAATAAAAAAAAATAAAAAATAA-CTTAAA---TAATTTGAGCTTTAGT  
AGAAAACTTACTAAATGCTAGCTTTTTCAGATTCAGGGAACTTAGGTTGAAAAAGTATAAGCAATCCTGAGCCAAATTT  
TATTCCTTTAAAAATAAGATAGGTGCAGAGACTCAATGGAAGCTATCCTAACGAATAATATTTTAAAGATTTTTTT-AATTA  
AATAATTAATTAATAGAAATAAATTTAACTAAAAATTTTATCTTTTATATATTAAGCGAGGATAAAGATAGAGTCCAATTT  
TACATGTTACTTTTTAGCAACAATTTAAATTGTAGTAAAAAGAAAAATCCGTTGGCTTTATTGACCGTGAGGGTTCAAGTCC  
CTCTACCCCCA-----AAAGT-----CTAA-----CCTTTC-----TTTTTATTGACATAAGCT  
CCTAGTTTATGTTACGATAGCCGAAACAAAACAA-TAAATAAAAAATTTAAATA

>P672

AAATCGTGGTGCCTTGACCTCGAATTGTAGTCTGGAGAAGTGTCTCTGCAACGGACCAGACCCAAGTTCACCTGGAAG  
TGGCGTCAGAGAGGGTGAAAACCCCGTCGAGTCTGGACACTGTTGCAAAACGAGGCACTGTCTGCGAGTCGAGCTGTTTG  
GGAATGCAGCTCTAAGTGGGTGGTAAATTCATCCAAGGCTAAATATTGGCAAGAGACCGATAGCGAACAAGTACCGCGA  
GGGAAAGATGAAAAGGACTTTGAAAAGAGAGTTAAAAAGTGCTTGAAATTGCTGGGAGGGAAGCGAATGGAAGCTGCGGG  
TGTGCCCTGGTTGGATGTGGAACGGTTTAGGCTGGTCCGCCGCTCAACGCGGGGCACTGGTCAGCGTGCGGCCATCGCGGC  
GGGACAAGAGCAGGATGTAGTTTCTTGCCATGCGGTTGTGGTGGCCGAGGAACGAAGCATGCG-CCACTTGTGG-CGTG  
GTA--TTTATACCAACTGCATGCTCGGGACGCTGGCGTATTGAGCTCTTCATCCGACCCGCTCTTGAAACACGGACCAAGG  
AGTCTAACATGTATGCGAGCCGGTGGGCGGCAAACCCATTGAGGCGCAAGTAACTGACA-TTT?A-AAAATTTGGAAGT  
AATAAAATTAGTTGCTGATTGTATTGAAAAAATA-----TTT-----AGTATCA  
-----ACTC-----GATCA-----TT  
TAATTATTGAGTAAAAATTATTATCTTGAACCTATTACTTATATATATATATATATATATAT--AAGTATATAAAATAAAAAAA-  
TTAAAAATTGTAACAAA-TAAATAT-----TTCTTATA-----GT  
ATAGAAAGATTCTAAAATTATAAAGTGATTAAAATAAAAAAAAATTCTTG-----TTCACCTAAAAAAAAGAA  
ATTAGGCAATATTTTATTTTTTGTATTCTTTAATACGTTTTTAATTAAATTTTATTTTTTATTAATTAGTTTAAACATTCA  
AAAGATTATTAGGTCAATGCTTAGAAAAATAAAAAATAATTTACTAAAAATAATCTGAGTTGCATCAAATATAAAAAATA  
ATATACAATGATACTGTTTTGTTATAGGAAAA-TCAGTTTATCTAAAAAATAGACAAAATTAAATACCAAAGAAGTTTTT

>P673

>P676



>P677

AAATCGTGGTGCCTTGCACCTCGAATTGTAGTCTGGAGAAGTGTCTCTGCAACGGACCAGACCCAAGTTCACCTGGAAG  
TGGCGTCAGAGAGGGTGAACACCCCGTCGAGTCTGGACACTGTTGCAAAACGAGGCACTGTCTGCGAGTCGAGCTGTTTG  
GGAATGCAGCTCTAAGTGGGTGGTAAATTCCATCCAAGGCTAAATATTGGCAAGAGACCGATAGCGAACAAGTACCGCGA  
GGGAAAGATGAAAAGGACTTTGAAAAGAGAGTTAAAAAGTGCTTGAAATTGCTGGGAGGGAAGCGAATGGAAGCTGCGGG  
TGTGCCCTGGTTGGATGTGGAACGGTTTAGGCTGGTCCGCCGCTCAACGCGGGGCACTGGTCAGCGTGGGCCATCGCGGC  
GGGACAAGAGCAGGATGTAGTTTCTTGCCATGCGGTTGTGGTGGCCGAGGAACGAAGCATGCG-CCACTTGTGG-CGTG  
GTA--TTTATACCAACTGCATGCTCGGGACGCTGGCGTATTGAGCTCTTCATCCGACCCGTCTTGAAACACGGACCAAGG  
AGTCTAACATGTATGCGAGCCGGTGGGCGGCAAACCCATTGAGGCGCAAGTAAACTGACA-TTT?A-AAAATTTGGAAGT  
AATAAAATTAGTTGCTGATTGTATTGAAAAAATA-----TTT-----AGTATCA  
-----ACTC-----GATCA-----TT  
TAATTATTGAGTAAAAATTATTATCTTGAACCTTATTACTTATATATATATATATATATAAGTATATAAAATAAAAAA-  
TTAAAAATTGTAACAAA-TAAATAT-----TTCTTATA-----GT  
ATAGAAAGATTCTAAAATTATAAAGTGATTAAAAATAAAAAAAATTTCTTG-----TTCACTTAAAAAAAAGAA  
ATTAGGCAATATTTTATTTTTTGTATTCTTTAATACGTTTTTAATTAAATTTTATTTTTATTAATTAGTTTAAACATTCA  
AAAGATTATTAGGTCAATGCTTAGAAAAATAAAAAATAATTTACTAAAAATAATCTGAGTTGCATCAAATATAAAAAATA  
ATATACAATGATACTGTTTTGTTATAGGAAAA-TCAGTTTATCTAAAAATAGACAAAATTAAATACCAAAGAAGTTTTT  
TTATAAGATT---AAAAGAAAAAACTTATTTGTCGAGCAGACCTCATCCTTGCAAGAATTATCAATTGAG-AAAATTTTT  
AAAAAAAAAAAAAAAAAATATATA?T??T?AAAATAAAAAAAAAAATAAAATAAA-CTTAAA---TAATTTGAGCTTTAGT  
AGAAAACTTACTAAATGCTAGCTTTTTCAGATTTCAGGGAACTTAGGTTGAAAAAGTATAAGCAATCCTGAGCCAAATTT  
TATTCCTTTAAAAATAAGATAGGTGCAGAGACTCAATGGAAGCTATCCTAACGAATAATATTTTAAGATTTTTTT-AATTA  
AATAATTAATTAATAGAAATAAATTTAACTAAAAATTTTATCTTTTATATATTAAGCGAGGATAAAGATAGAGTCCAATTT  
TACATGTTACTTTTAGCAACAATTTAAATTGTAGTAAAAAGAAAATCCGTTGGCTTTATTGACCGTGAGGGTTCAAGTCC  
CTCTACCCCA-----AAAGT-----CTAA-----CCTTTC-----TTTTTATTGACATAAGCT  
CCTAGTTTATGTTACGATAGCCGAAACAAAACAA-TAAATAAAAAATTTAAATA

>P678

AAATCGTGGTGCCTTGCACCTCGAATTGTAGTCTGGAGAAGTGTCTCTGCAACGGACCAGACCCAAGTTCACCTGGAAG  
TGGCGTCAGAGAGGGTGAACACCCCGTCGAGTCTGGACACTGTTGCAAAACGAGGCACTGTCTGCGAGTCGAGCTGTTTG  
GGAATGCAGCTCTAAGTGGGTGGTAAATTCCATCCAAGGCTAAATATTGGCAAGAGACCGATAGCGAACAAGTACCGCGA  
GGGAAAGATGAAAAGGACTTTGAAAAGAGAGTTAAAAAGTGCTTGAAATTGCTGGGAGGGAAGCGAATGGAAGCTGCGGG  
TGTGCCCTGGTTGGATGTGGAACGGTTTAGGCTGGTCCGCCGCTCAACGCGGGGCACTGGTCAGCGTGGGCCATCGCGGC  
GGGACAAGAGCAGGATGTAGTTTCTTGCCATGCGGTTGTGGTGGCCGAGGAACGAAGCATGCG-CCACTTGTGG-CGTG  
GTA--TTTATACCAACTGCATGCTCGGGACGCTGGCGTATTGAGCTCTTCATCCGACCCGTCTTGAAACACGGACCAAGG  
AGTCTAACATGTATGCGAGCCGGTGGGCGGCAAACCCATTGAGGCGCAAGTAAACTGACA-TTT?A-AAAATTTGGAAGT  
AATAAAATTAGTTGCTGATTGTATTGAAAAAATA-----TTT-----AGTATCA  
-----ACTC-----GATCA-----TT  
TAATTATTGAGTAAAAATTATTATCTTGAACCTTATTACTTATATATATATATATATATAAGTATATAAAATAAAAAA-  
TTAAAAATTGTAACAAA-TAAATAT-----TTCTTATA-----GT  
ATAGAAAGATTCTAAAATTATAAAGTGATTAAAAATAAAAAAAATTTCTTG-----TTCACTTAAAAAAAAGAA  
ATTAGGCAATATTTTATTTTTTGTATTCTTTAATACGTTTTTAATTAAATTTTATTTTTATTAATTAGTTTAAACATTCA  
AAAGATTATTAGGTCAATGCTTAGAAAAATAAAAAATAATTTACTAAAAATAATCTGAGTTGCATCAAATATAAAAAATA  
ATATACAATGATACTGTTTTGTTATAGGAAAA-TCAGTTTATCTAAAAATAGACAAAATTAAATACCAAAGAAGTTTTT  
TTATAAGATT---AAAAGAAAAAACTTATTTGTCGAGCAGACCTCATCCTTGCAAGAATTATCAATTGAG-AAAATTTTT  
AAAAAAAAAAAAAAAAAATATATA?T??T?AAAATAAAAAAAAAAATAAAATAAA-CTTAAA---TAATTTGAGCTTTAGT  
AGAAAACTTACTAAATGCTAGCTTTTTCAGATTTCAGGGAACTTAGGTTGAAAAAGTATAAGCAATCCTGAGCCAAATTT  
TATTCCTTTAAAAATAAGATAGGTGCAGAGACTCAATGGAAGCTATCCTAACGAATAATATTTTAAGATTTTTTT-AATTA  
AATAATTAATTAATAGAAATAAATTTAACTAAAAATTTTATCTTTTATATATTAAGCGAGGATAAAGATAGAGTCCAATTT  
TACATGTTACTTTTAGCAACAATTTAAATTGTAGTAAAAAGAAAATCCGTTGGCTTTATTGACCGTGAGGGTTCAAGTCC  
CTCTACCCCA-----AAAGT-----CTAA-----CCTTTC-----TTTTTATTGACATAAGCT  
CCTAGTTTATGTTACGATAGCCGAAACAAAACAA-TAAATAAAAAATTTAAATA

>P679

AAATCGTGGTGCCTTGCACCTCGAATTGTAGTCTGGAGAAGTGTCTCTGCAACGGACCAGACCCAAGTTCACCTGGAAG  
TGGCGTCAGAGAGGGTGAACACCCCGTCGAGTCTGGACACTGTTGCAAAACGAGGCACTGTCTGCGAGTCGAGCTGTTTG  
GGAATGCAGCTCTAAGTGGGTGGTAAATTCCATCCAAGGCTAAATATTGGCAAGAGACCGATAGCGAACAAGTACCGCGA  
GGGAAAGATGAAAAGGACTTTGAAAAGAGAGTTAAAAAGTGCTTGAAATTGCTGGGAGGGAAGCGAATGGAAGCTGCGGG  
TGTGCCCTGGTTGGATGTGGAACGGTTTAGGCTGGTCCGCCGCTCAACGCGGGGCACTGGTCAGCGTGGGCCATCGCGGC  
GGGACAAGAGCAGGATGTAGTTTCTTGCCATGCGGTTGTGGTGGCCGAGGAACGAAGCATGCG-CCACTTGTGG-CGTG  
GTA--TTTATACCAACTGCATGCTCGGGACGCTGGCGTATTGAGCTCTTCATCCGACCCGTCTTGAAACACGGACCAAGG

AGTCTAACATGTATGCGAGCCGGTGGGCGGCAAACCCATTGAGGCGCAAGTAAACTGACA-TTT?A-AAAATTTGGAAGT  
AATAAAATTAGTTGCTGATTGTATTGAAAAAATA-----TTT-----AGTATCA  
-----ACTC-----GATCA-----TT  
TAATTATTGAGTAAAAATTATTATCTTGAACCTTATTACTTATATATATATATATATATAAGTATATAAAATAAAAAA-  
TTAAAAATTGTAACAAA-TAAATAT-----TTCTTATA-----GT  
ATAGAAAGATTCTAAAATTATAAAGTGATTAAAATAAAAAAAAATTCTTG-----TTCACCTAAAAAAAAGAA  
ATTAGGCAATATTTTATTTTTTGTATTCTTTAATACGTTTTTAATTAAATTTTATTTTTTATTAATTAGTTTAACATTCA  
AAAGATTATTAGGTCAATGCTTAGAAAAATAAAAAATAATTTACTAAAAATAATCTGAGTTGCATCAAATATAAAAAATA  
ATATACAATGATACTGTTTTGTTATAGGAAAA-TCAGTTTATCTAAAAAATAGACAAAATTAAATACCAAAGAAGTTTTT  
TTATAAGATT---AAAAGAAAAAACTTATTTGTCGAGCAGACCTCATCCTTGCAAGAATTATCAATTGAG-AAAATTTTT  
AAAAAAAAAAAAAAAAAATATATA?T???AAAATAAAAAAAAAAATAAAATAAA-CTTAAA---TAATTTGAGCTTTAGT  
AGAAAACTTACTAAATGCTAGCTTTTTCAGATTCAGGGAACTTAGGTTGAAAAAGTATAAGCAATCCTGAGCCAAATTT  
TATTCCTTTAAAAATAAGATAGGTGCAGAGACTCAATGGAAGCTATCCTAACGAATAATATTTTAAGATTTTTTTT-AATTA  
AATAATTAATTAATAGAAATAAATTTAACTAAAATTTTATCTTTTATATATTAAGCGAGGATAAAGATAGAGTCCAATTT  
TACATGTTACTTTTAGCAACAATTTAAATTGTAGTAAAAAGAAAATCCGTTGGCTTTATTGACCGTGAGGGTTCAAGTCC  
CTCTACCCCCA-----AAAGT-----CTAA----CCTTTC-----TTTTATTGACATAAGCT  
CCTAGTTTATGTTACGATAGCCGAAACAAAACAA-TAAATAAAAAATTTAAATA

>P680

AAATCGTGGTGCCTTGCACCTCGAATTGTAGTCTGGAGAAGTGTCTCTGCAACGGACCAGACCCAAGTTCACCTGGAAG  
TGGCGTCAGAGAGGGTGAAAACCCCGTCGAGTCTGGACACTGTTGCAAAACGAGGCACTGTCTGCGAGTCGAGCTGTTTG  
GGAATGCAGCTCTAAGTGGGTGGTAAATTCATCCAAGGCTAAATATTGGCAAGAGACCGATAGCGAACAAGTACCGCGA  
GGGAAAGATGAAAAGGACTTTGAAAAGAGAGTTAAAAAGTGCTTGAAATTGCTGGGAGGGAAGCGAATGGAAGCTGCGGG  
TGTGCCCTGGTTGGATGTGGAACGGTTTAGGCTGGTCCGCCGCTCAACGCGGGGCACTGGTCAGCGTGGGCCATCGCGGC  
GGGACAAGAGCAGGATGTAGTTTCTTGCCATGCGGTTGTGGTGGCCGAGGAACGAAGCATGCG-CCACTTGTGG-CGTG  
GTA--TTTATACCAACTGCATGCTCGGGACGCTGGCGTATTGAGCTCTTCATCCGACCCGCTCTTGAAACACGGACCAAGG  
AGTCTAACATGTATGCGAGCCGGTGGGCGGCAAACCCATTGAGGCGCAAGTAAACTGACA-TTT?A-AAAATTTGGAAGT  
AATAAAATTAGTTGCTGATTGTATTGAAAAAATA-----TTT-----AGTATCA  
-----ACTC-----GATCA-----TT  
TAATTATTGAGTAAAAATTATTATCTTGAACCTTATTACTTATATATATATATATATATAAGTATATAAAATAAAAAA-  
TTAAAAATTGTAACAAA-TAAATAT-----TTCTTATA-----GT  
ATAGAAAGATTCTAAAATTATAAAGTGATTAAAATAAAAAAAAATTCTTG-----TTCACCTAAAAAAAAGAA  
ATTAGGCAATATTTTATTTTTTGTATTCTTTAATACGTTTTTAATTAAATTTTATTTTTTATTAATTAGTTTAACATTCA  
AAAGATTATTAGGTCAATGCTTAGAAAAATAAAAAATAATTTACTAAAAATAATCTGAGTTGCATCAAATATAAAAAATA  
ATATACAATGATACTGTTTTGTTATAGGAAAA-TCAGTTTATCTAAAAAATAGACAAAATTAAATACCAAAGAAGTTTTT  
TTATAAGATT---AAAAGAAAAAACTTATTTGTCGAGCAGACCTCATCCTTGCAAGAATTATCAATTGAG-AAAATTTTT  
AAAAAAAAAAAAAAAAAATATATA?T???AAAATAAAAAAAAAAATAAAATAAA-CTTAAA---TAATTTGAGCTTTAGT  
AGAAAACTTACTAAATGCTAGCTTTTTCAGATTCAGGGAACTTAGGTTGAAAAAGTATAAGCAATCCTGAGCCAAATTT  
TATTCCTTTAAAAATAAGATAGGTGCAGAGACTCAATGGAAGCTATCCTAACGAATAATATTTTAAGATTTTTTTT-AATTA  
AATAATTAATTAATAGAAATAAATTTAACTAAAATTTTATCTTTTATATATTAAGCGAGGATAAAGATAGAGTCCAATTT  
TACATGTTACTTTTAGCAACAATTTAAATTGTAGTAAAAAGAAAATCCGTTGGCTTTATTGACCGTGAGGGTTCAAGTCC  
CTCTACCCCCA-----AAAGT-----CTAA----CCTTTC-----TTTTATTGACATAAGCT  
CCTAGTTTATGTTACGATAGCCGAAACAAAACAA-TAAATAAAAAATTTAAATA

>P681

AAATCGTGGTGCCTTGCACCTCGAATTGTAGTCTGGAGAAGTGTCTCTGCAACGGACCAGACCCAAGTTCACCTGGAAG  
TGGCGTCAGAGAGGGTGAAAACCCCGTCGAGTCTGGACACTGTTGCAAAACGAGGCACTGTCTGCGAGTCGAGCTGTTTG  
GGAATGCAGCTCTAAGTGGGTGGTAAATTCATCCAAGGCTAAATATTGGCAAGAGACCGATAGCGAACAAGTACCGCGA  
GGGAAAGATGAAAAGGACTTTGAAAAGAGAGTTAAAAAGTGCTTGAAATTGCTGGGAGGGAAGCGAATGGAAGCTGCGGG  
TGTGCCCCGGTTGGATGTGGAACGGTTTAGGCTGGTCCGCCGCTCAACGCGGGGCACTGGTCAGCGTGGGCCATCGCGGC  
GGGACAAGAGCAGGATGTAGTTTCTTGCCATGCGGTTGTGGTGGCCGAGGAACGAAGCATGCG-CCACTTGTGG-CGTG  
GTA--TTTATACCAACTGCATGCTCGGGACGCTGGCGTATTGAGCTCTTCATCCGACCCGCTCTTGAAACACGGACCAAGG  
AGTCTAACATGTATGCGAGCCGGTGGGCGGCAAACCCATTGAGGCGCAAGTAAACTGACA-TTT?A-AAAATTTGGAAGT  
AATAAAATTAGTTGCTGATTGTATTGAAAAAATA-----TTT-----AGTATCA  
-----ACTC-----GATCA-----TT  
TAATTATTGAGTAAAAATTATTATCTTGAACCTTATTACTTATATATAT-----AAGTATATAAAATAAAAAA-  
TTAAAAATTGTAACAAA-TAAATAT-----TTCTTATA-----GT  
ATAGAAAGATTATAAAATTATAAAGTGATTAAAATAAAAAAAAATTCTTG-----TTTACTTAAAAAAAAGAA  
ATTAGGCAATATTTTATTTTTTGTATTCTTTAATACGTTTTTAATTAAATTTTATTTTTTATTAATTAGTTTAACATTCA  
AAAGATTATTAGGTCAATGCTTAGAAAAATAAAAAATAATTTACTAAAAATAATCTGAGTTGCATCAAATATAAAAAATA

ATATACAATGATACTGTTTTGTTATAGGAAAA-TCAGTTTATCTAAAAAATAGACAAAATTAAATACCAAAGAAGTTTTT  
TTATAAGATT---AAAAGAAAAAACTTATTTGTCGAGTAGACCTCATCCTTGCAAGAGTTATCAATTGAG-AAAATTTTT  
AAAAAAAAT?????AAAATATATA?T???AAAATAAAAAAAAATAAAATAAA-CTTAAA---TAATTTGAGCTTTAGT  
AGAAAACTTACTAAATGCTAGCTTTTCAGATTCAGGGAACTTAGGTTGAAAAAGTATAAGCAATCCTGAGCCAAATTT  
TATTCCTTTAAAAATAAGATAGGTGCAGAGACTCAATGGAAGCTATCCTAACGAATAATATTTTAAGATTTTTTTT-AATTA  
AATAATTAATTAATAGAAATAAATTTAACTAAAATTTTATCTTTTATATATTAAGCGAGGATAAAGATAGAGTCCAATTT  
TACATGTTACTTTTAGCAACAATTTAAATTGTAGTAAAAAGAAAATCCGTTGGCTTTATTGACCGTGAGGGTTCAAGTCC  
CTCTACCCCCA-----AAAGT-----CTAA----CCTTTC-----TTTTATTGACATAAGCT  
CCTAGTTTATGTTACGATAGCCGAAACAAAACAA-TAAATAAAAAATTTAAATA

>P682

AAATCGTGGTGCCTTGCACCTCGAATTGTAGTCTGGAGAAGTGTCTCTGCAACGGACCAGACCCAAGTTCACCTGGAAG  
TGGCGTCAGAGAGGGTGAAAACCCCGTCGAGTCTGGACACTGTTGCAAAACGAGGCACTGTCTGCGAGTCGAGCTGTTTG  
GGAATGCAGCTCTAAGTGGGTGGTAAATTCCATCCAAGGCTAAATATTGGCAAGAGACCGATAGCGAACAAGTACCGCGA  
GGGAAAGATGAAAAGGACTTTGAAAAGAGAGTTAAAAAGTGCTTGAAATTGCTGGGAGGGAAGCGAATGGAAGCTGCGGG  
TGTGCCCTGGTTGGATGTGGAACGGTTTAGGCTGGTCCGCCGCTCAACGCGGGGCACTGGTCAGCGTGGGCCATCGCGGC  
GGGACAAGAGCAGGATGTAGTTTCTTGCCATGCGGTTGTGGTGGCCGAGGAACGAAGCATGCG-CCACTTGTGG-CGTG  
GTA--TTTATACCAACTGCATGCTCGGGACGCTGGCGTATTGAGCTCTTCATCCGACCCGCTCTTGAAACACGGACCAAGG  
AGTCTAACATGTATGCGAGCCGGTGGGCGGCAAACCCATTGAGGCGCAAGTAACTGACA-TTT?A-AAAATTTGGAAGT  
AATAAAATTAGTTGCTGATTGTATTGAAAAAAATA-----TTT-----AGTATCA  
-----ACTC-----GATCA-----TT  
TAATTATTGAGTAAAAATTATTATCTTGAACCTTATTACTTATATATATATATATATATAAGTATATAAAATAAAAAA-  
TTAAAAATTGTAACAAA-TAAATAT-----TTCTTATA-----GT  
ATAGAAAGATTCTAAAATTATAAAGTGATTAAAAATAAAAAAAAATTCTTG-----TTCACTTAAAAAAAAGAA  
ATTAGGCAATATTTTATTTTTTGTATTCTTTAATACGTTTTTAATTAATTTTATTTTATTAATTAGTTTAACATTCA  
AAAGATTATTAGGTCAATGCTTAGAAAAATAAAAAATAATTTACTAAAAATAATCTGAGTTGCATCAAATATAAAAAATA  
ATATACAATGATACTGTTTTGTTATAGGAAAA-TCAGTTTATCTAAAAAATAGACAAAATTAAATACCAAAGAAGTTTTT  
TTATAAGATT---AAAAGAAAAAACTTATTTGTCGAGCAGACCTCATCCTTGCAAGAATTATCAATTGAG-AAAATTTTT  
AAAAAAAAAAAAAAAAAATATATA?T???AAAATAAAAAAAAATAAAATAAA-CTTAAA---TAATTTGAGCTTTAGT  
AGAAAACTTACTAAATGCTAGCTTTTCAGATTCAGGGAACTTAGGTTGAAAAAGTATAAGCAATCCTGAGCCAAATTT  
TATTCCTTTAAAAATAAGATAGGTGCAGAGACTCAATGGAAGCTATCCTAACGAATAATATTTTAAGATTTTTTTT-AATTA  
AATAATTAATTAATAGAAATAAATTTAACTAAAATTTTATCTTTTATATATTAAGCGAGGATAAAGATAGAGTCCAATTT  
TACATGTTACTTTTAGCAACAATTTAAATTGTAGTAAAAAGAAAATCCGTTGGCTTTATTGACCGTGAGGGTTCAAGTCC  
CTCTACCCCCA-----AAAGT-----CTAA----CCTTTC-----TTTTATTGACATAAGCT  
CCTAGTTTATGTTACGATAGCCGAAACAAAACAA-TAAATAAAAAATTTAAATA

>P683

AAATCGTGGTGCCTTGCACCTCGAATTGTAGTCTGGAGAAGTGTCTCTGCAACGGACCAGACCCAAGTTCACCTGGAAG  
TGGCGTCAGAGAGGGTGAAAACCCCGTCGAGTCTGGACACTGTTGCAAAACGAGGCACTGTCTGCGAGTCGAGCTGTTTG  
GGAATGCAGCTCTAAGTGGGTGGTAAATTCCATCCAAGGCTAAATATTGGCAAGAGACCGATAGCGAACAAGTACCGCGA  
GGGAAAGATGAAAAGGACTTTGAAAAGAGAGTTAAAAAGTGCTTGAAATTGCTGGGAGGGAAGCGAATGGAAGCTGCGGG  
TGTGCCCTGGTTGGATGTGGAACGGTTTAGGCTGGTCCGCCGCTCAACGCGGGGCACTGGTCAGCGTGGGCCATCGCGGC  
GGGACAAGAGCAGGATGTAGTTTCTTGCCATGCGGTTGTGGTGGCCGAGGAACGAAGCATGCG-CCACTTGTGG-CGTG  
GTA--TTTATACCAACTGCATGCTCGGGACGCTGGCGTATTGAGCTCTTCATCCGACCCGCTCTTGAAACACGGACCAAGG  
AGTCTAACATGTATGCGAGCCGGTGGGCGGCAAACCCATTGAGGCGCAAGTAACTGACA-TTT?A-AAAATTTGGAAGT  
AATAAAATTAGTTGCTGATTGTATTGAAAAAAATA-----TTT-----AGTATCA  
-----ACTC-----GATCA-----TT  
TAATTATTGAGTAAAAATTATTATCTTGAACCTTATTACTTATATATATATATATATATAAGTATATAAAATAAAAAA-  
TTAAAAATTGTAACAAA-TAAATAT-----TTCTTATA-----GT  
ATAGAAAGATTCTAAAATTATAAAGTGATTAAAAATAAAAAAAAATTCTTG-----TTCACTTAAAAAAAAGAA  
ATTAGGCAATATTTTATTTTTTGTATTCTTTAATACGTTTTTAATTAATTTTATTTTATTAATTAGTTTAACATTCA  
AAAGATTATTAGGTCAATGCTTAGAAAAATAAAAAATAATTTACTAAAAATAATCTGAGTTGCATCAAATATAAAAAATA  
ATATACAATGATACTGTTTTGTTATAGGAAAA-TCAGTTTATCTAAAAAATAGACAAAATTAAATACCAAAGAAGTTTTT  
TTATAAGATT---AAAAGAAAAAACTTATTTGTCGAGCAGACCTCATCCTTGCAAGAATTATCAATTGAG-AAAATTTTT  
AAAAAAAAAAAAAAAAAATATATA?T???AAAATAAAAAAAAATAAAATAAA-CTTAAA---TAATTTGAGCTTTAGT  
AGAAAACTTACTAAATGCTAGCTTTTCAGATTCAGGGAACTTAGGTTGAAAAAGTATAAGCAATCCTGAGCCAAATTT  
TATTCCTTTAAAAATAAGATAGGTGCAGAGACTCAATGGAAGCTATCCTAACGAATAATATTTTAAGATTTTTTTT-AATTA  
AATAATTAATTAATAGAAATAAATTTAACTAAAATTTTATCTTTTATATATTAAGCGAGGATAAAGATAGAGTCCAATTT  
TACATGTTACTTTTAGCAACAATTTAAATTGTAGTAAAAAGAAAATCCGTTGGCTTTATTGACCGTGAGGGTTCAAGTCC  
CTCTACCCCCA-----AAAGT-----CTAA----CCTTTC-----TTTTATTGACATAAGCT

CCTAGTTTATGTTACGATAGCCGAAACAAAACAA-TAAATAAAAAATTTAAATA  
>P685

AAATCGTGGTGCCTTGCACCTCGAATTGTAGTCTGGAGAAGTGTCTCTGCAACGGACCAGACCCAAGTTCACCTGGAAG  
TGGCGTCAGAGAGGGTGAAAACCCCGTCGAGTCTGGACACTGTTGCAAAACGAGGCACTGTCTGCGAGTCGAGCTGTTTG  
GGAATGCAGCTCTAAGTGGGTGGTAAATTCCATCCAAGGCTAAATATTGGCAAGAGACCGATAGCGAACAAGTACCGCGA  
GGGAAAGATGAAAAGGACTTTGAAAAGAGAGTTAAAAAGTGCTTGAAATTGCTGGGAGGGAAGCGAATGGAAGCTGCGGG  
TGTGCCCCGGTTGGATGTGGAACGGTTTAGGCTGGTCCGCCGCTCAACGCGGGGCACTGGTCAGCGTGGGCCATCGCGGC  
GGGACAAGAGCAGGATGTAGTTTCTGCCTATGCCGTTGTGGTGGCCGAGGAACGAAGCATGCG-CCACTTGTGG-CGTG  
GTA--TTTATACCAACTGCATGCTCGGGACGCTGGCGTATTGAGCTCTTCATCCGACCCGCTTTGAAACACGGACCAAGG  
AGTCTAACATGTATGCGAGCCGGTGGGCGGCAAACCCATTGAGGCGCAAGTAACTGACA-TTT?A-AAAATTTGGAAGT  
AATAAAATTAGTTGCTGATTGTATTGAAAAAATA-----TTT-----AGTATCA  
-----ACTC-----GATCA-----TT  
TAATTATTGAGTAAAAATTATTATCTTGAACCTTATTACTTATATATATATAT-----AAGTATATAAAATAAAAAAA-  
TTAAAAATTGTAACAAA-TAAATAT-----TTCTTATA-----GT  
ATAGAAAGATTATAAAATTATAAAGTGATTAAAAATAAAAAAAAATTCCTG-----TTTACTTAAAAAAAAGAA  
ATTAGGCAATATTTTATTTTTTGTATTCTTTAATACGTTTTTAATTAATTTTATTTTATTAATTAGTTTAAACATTCA  
AAAGATTATTAGGTCAATGCTTAGAAAAATAAAAAATAATTTACTAAAAATAATCTGAGTTGCATCAAATATAAAAAATA  
ATATACAATGATACTGTTTTGTTATAGGAAAA-TCAGTTTATCTAAAAATAGACAAAATTAATACCAAAGAAGTTTTT  
TTATAAGATT---AAAAGAAAAAAGTTATTTGTCGAGTAGACCTCATCCTTGCAAGAGTTATCAATTGAG-AAAATTTTT  
AAAAAAAAAAAA?T??AAAATATATA?T??AAAATAAAAAAAAAAATAAAATAAA-CTTAAA---TAATTTGAGCTTTAGT  
AGAAAACTTACTAAATGCTAGCTTTTCTAGATTTCAGGGAACTTAGGTTGAAAAAGTATAAGCAATCCTGAGCCAAATTT  
TATTCCTTTAAAAATAAGATAGGTGCAGAGACTCAATGGAAGCTATCCTAACGAATAATATTTTAAGATTTTTTT-AATTA  
AATAATTAATTAATAGAAATAAATTTAACTAAAAATTTTATCTTTTATATATTAAGCGAGGATAAAGATAGAGTCCAATTT  
TACATGTTACTTTTAGCAACAATTTAAATTGTAGTAAAAAGAAAATCCGTTGGCTTTATTGACCGTGAGGGTTCAAGTCC  
CTCTACCCCCA-----AAAGT-----CTAA----CCTTTC-----TTTTATTGACATAAGCT  
CCTAGTTTATGTTACGATAGCCGAAACAAAACAA-TAAATAAAAAATTTAAATA

>Timmia\_austriaca\_1

AAATCGTGGTGCCTTGCACCTCGAATTGTAGTCTGGAGAAGTGTCTCTGCAACGGACCAGACCCAAGTTCACCTGGAAG  
TGGCGTCAGAGAGGGTGAAAACCCCGTCGAGTCTGGACACTGTTGCAAAACGAGGCACTGTCTGCGAGTCGAGCTGTTTG  
GGAATGCAGCTCTAAGTGGGTGGTAAATTCCATCCAAGGCTAAATATTGGCAAGAGACCGATAGCGAACAAGTACCGCGA  
GGGAAAGATGAAAAGGACTTTGAAAAGAGAGTTAAAAAGTGCTTGAAATTGCTGGGAGGGAAGCGAATGGAAGCTGCGGG  
TGTGCCCTGGTTGGATGTGGAACGGTTTAGGCTGGTCCGCCGCTCAACGCGGGGCACTGGTCAGCGTGGGCCATCGCGGC  
GGGACAAGAGCAGGATGTAGTTTCTTGCTATGCCGTTGTGGTGGCCGAGGAACGAAGCATGCG-CCACTTGTGG-CGTG  
GTA--TTTATACCAACTGCATGCTCGGGACGCTGGCGTATTGAGCTCTTCATCCGACCCGCTTTGAAACACGGACCAAGG  
AGTCTAACATGTATGCGAGCCGGTGGGCGGCAAACCCATTGAGGCGCAAGTAACTGACA-TTT?A-AAAATTTGGAAGT  
AATAAAATTAGTTGCTGATTGTATTGAAAAAATA-----TTT-----AGTATCA  
-----ACTC-----GATCA-----TT  
TAATTATTGAGTAAAAATTATTATCTTGAACCTTATTACTTATATATATATATATATAAGTATATAAAATAAAAAAA-  
TTAAAAATTGTAACAAA-TAAATAT-----TTCTTATA-----GT  
ATAGAAAGATTCTAAAATTATAAAGTGATTAAAAATAAAAAAAAATTCCTG-----TTTACTTAAAAAAAAGAA  
ATTAGGCAATATTTTATTTTTTGTATTCTTTAATACGTTTTTAATTAATTTTATTTTATTAATTAGTTTAAACATTCA  
AAAGATTATTAGGTCAATGCTTAGAAAAATAAAAAATAATTTACTAAAAATAATCTGAGTTGCATCAAATATAAAAAATA  
ATATACAATGATAC-GTTTTGTTATAGGAAAA-TCAGTTTATCTAAAAATAGACAAAATTAATACCAAAGAAGTTTTT  
TTATAAGATT---AAAAGAAAAAAGTTATTTGTCGAGCAGACCTCATCCTTGCAAGAATTATCAATTGAG-AAAATTTTT  
AAAAAAAAAAAAAAAAAATATATA?T??AAAATAAAAAAAAAATTAATAAA-CTTAAA---TAATTTGAGCTTTAGT  
AGAAAACTTACTAAATGCTAGCTTTTCTAGATTTCAGGGAACTTAGGTTGAAAAAGTATAAGCAATCCTGAGCCAAATTT  
TATTCCTTTAAAAATAAGATAGGTGCAGAGACTCAATGGAAGCTATCCTAACGAATAATATTTTAAGATTTTTTT-AATTA  
AATAATTAATTAATAGAAATAAATTTAACTAAAAATTTTATCTTTTATATATTAAGCGAGGATAAAGATAGAGTCCAATTT  
TACATGTTACTTTTAGCAACAATTTAAATTGTAGTAAAAAGAAAATCCGTTGGCTTTATTGACCGTGAGGGTTCAAGTCC  
CTCTACCCCCA-----AAAGT-----CTAA----CCTTTC-----TTTTATTGACATAAGCT  
CCTAGTTTATGTTACGATAGCCGAAACAAAACAA-TAAATAAAAAATTTAAATA

>Timmia\_austriaca\_3

AAATCGTGGTGCCTTGCACCTCGAATTGTAGTCTGGAGAAGTGTCTCTGCAACGGACCAGACCCAAGTTCACCTGGAAG  
TGGCGTCAGAGAGGGTGAAAACCCCGTCGAGTCTGGACACTGTTGCAAAACGAGGCACTGTCTGCGAGTCGAGCTGTTTG  
GGAATGCAGCTCTAAGTGGGTGGTAAATTCCATCCAAGGCTAAATATTGGCAAGAGACCGATAGCGAACAAGTACCGCGA  
GGGAAAGATGAAAAGGACTTTGAAAAGAGAGTTAAAAAGTGCTTGAAATTGCTGGGAGGGAAGCGAATGGAAGCTGCGGG  
TGTGCCCTGGTTGGATGTGGAACGGTTTAGGCTGGTCCGCCGCTCAACGCGGGGCACTGGTCAGCGTGGGCCATCGCGGC  
GGGACAAGAGCAGGATGTAGTTTCTTGCTATGCCGTTGTGGTGGCCGAGGAACGAAGCATGCG-CCACTTGTGG-CGTG

GTA--TTTATACCAACTGCATGCTCGGGACGCTGGCGTATTGAGCTCTTCATCCGACCCGTCTTGAAACACGGACCAAGG  
AGTCTAACATGTATGCGAGCCGGTGGGCGGCAAACCCATTGAGGCGCAAGTAACTGACA-TTT?A-AAAATTTGGAAGT  
AATAAAATTAGTTGCTGATTGTATTGAAAAAATA-----TTT-----AGTATCA  
-----ACTC-----GATCA-----TT  
TAATTATTGAGTAAATTTATTATCTTGAACCTTATTACTTATATATATATATATATATAAGTATATAAAATAAAAAA-  
TTAAAAATTGTAACAAA-TAAATAT-----TTCTTATA-----GT  
ATAGAAAGATTCTAAAATTATAAAGTGATTAAAATAAAAAAAAATTCTTG-----TTCACCTAAAAAAAAGAA  
ATTAGGCAATATTTTATTTTTTGTATTCTTTAATACGTTTTTAATTAAATTTTATTTTATTAAATAGTTAAACATTCA  
AAAGATTATTAGGTCAAAGCTTAGAAAAATAAAAAATAATTTACTAAAAATAATCTGAGTTGCATCAAATATAAAAAATA  
ATATACAATGATAC-GTTTTGTTATAGGAAAA-TCAGTTTATCTAAAAATAGACAAAATTAAATACCAAAGAAGTTTTT  
TTATAAGATT---AAAAGAAAAAAGTTATTTGTCGAGCAGACCTCATCCTTGCAAGAATTATCAATTGAG-AAAATTTTT  
AAAAAAAAAAAAAAAAAATATATA?T??TAAAAATAAAAAAATTTAAATAAA-CTTAAA---TAATTTGAGCTTTAGT  
AGAAAACTTACTAAATGCTAGCTTTTTCAGATTTCAGGGAACTTAGGTTGAAAAAGTATAAGCAATCCTGAGCCAAATTT  
TATTCCTTTAAAAATAAGATAGGTGCAGAGACTCAATGGAAGCTATCCTAACGAATAATATTTTAAAGATTTTTTT-AATTA  
AATAATTAATTAATAGAAATAAATTTAACTAAAATTTTATCTTTTATATATTAAGCGAGGATAAAGATAGAGTCCAATTT  
TACATGTTACTTTTAGCAACAATTTAAATTGTAGTAAAAAGAAAATCCGTTGGCTTTATTGACCGTGAGGGTTCAAGTCC  
CTCTACCCCCA-----AAAGT-----CTAA----CCTTTC-----TTTTTATTGACATAAGCT  
CCTAGTTTATGTTACGATAGCCGAAACAAAACAA-TAAATAAAAAATTTAAATA

>Timmia\_austriaca\_4

NNNNNNNNNNNNNNNNNNNNNNNNNNNNNNNNNNNNNNNNNNNNNAAGTGTCTCTGCAACGGACCAGACCCAAGTTCACCTGGAGAG  
TGGCGTCCCAGAGGGTGAAAACCCCGTCTAGTCTGGACACTGTTGCACAACTAGGCACTGTCTGCGAGTCCAGCTGTTTG  
GGAATGCAGCTCTAAATGGGTGGTAAATTCATGCAAGGCTAAATATTGGCAAGAGACCGATAGCGAACAAGTACCGCGA  
GGGAAAGATGAAAAGGACTTTGAAAAGAGAGTTAAAAAGTGCTTGAAATTGCTGGGAGGGAAGCGAATGGAAGCTGCGGG  
TGTGCCCTGGTTGGATGTGGAACGGTTTAGGCTGGTCCGCCGCTCAACGCGGGGCACTGGTCAGCGTGGGCCATCGCGGC  
GGGACAAGAGCAGGATGTAGTTTCTTGCCATGCGGTTGTGGTGGCCGAGGAACGAAGCATGCG-CCACTTGTGG-CGTG  
GTA--TTTATACCAACTGCATGCTCGGGACGCTGGCGTATTGAGCTCTTCATCCGACCCGTCTTGAAACACGGACCAAGG  
AGTCTAACATGTATGCGAGCCGGTGGGCGGCAAACCCATTGAGGCGCAAGTAACTGACA-TTT?A-AAAATTTGGAAGT  
AATAAAATTAGTTGCTGATTGTATTGAAAAAATA-----TTT-----AGTATCA  
-----ACTC-----GATCA-----TT  
TAATTATTGAGTAAATTTATTATCTTGAACCTTATTACTTATATATATATATATATATAT--AAGTATATAAAATAAAAAA-  
TTAAAAATTGTAACAAA-TAAATAT-----TTCTTATA-----GT  
ATAGAAAGATTCTAAAATTATAAAGTGATTAAAATAAAAAAAAATTCTTG-----TTCACCTAAAAAAAAGAA  
ATTAGGCAATATTTTATTTTTTGTATTCTTTAATACGTTTTTAATTAAATTTTATTTTATTAAATAGTTTAAACATTCA  
AAAGATTATTAGGTCATGCTTAGAAAAATAAAAAATAATTTACTAAAAATAATCTGAGTTGCATCAAATATAAAAAATA  
ATATACAATGATAC-GTTTTGTTATAGGAAAA-TCAGTTTATCTAAAAATAGACAAAATTAAATACCAAAGAAGTTTTT  
TTATAAGATT---AAAAGAAAAAAGTTATTTGTCGAGCAGACCTCATCCTTGCAAGAATTATCAATTGAG-AAAATTTTT  
AAAAAAAAAAAAAAT?AAAATATATA?T??TAAAAATAAAAAAATTTAAATAAA-CTTAAA---TAATTTGAGCTTTAGT  
AGAAAACTTACTAAATGCTAGCTTTTTCAGATTTCAGGGAACTTAGGTTGAAAAAGTATAAGCAATCCTGAGCCAAATTT  
TATTCCTTTAAAAATAAGATAGGTGCAGAGACTCAATGGAAGCTATCCTAACGAATAATATTTTAAAGATTTTTTT-AATTA  
AATAATTAATTAATAGAAATAAATTTAACTAAAATTTTATCTTTTATATATTAAGCGAGGATAAAGATAGAGTCCAATTT  
TACATGTTACTTTTAGCAACAATTTAAATTGTAGTAAAAAGAAAATCCGTTGGCTTTATTGACCGTGAGGGTTCAAGTCC  
CTCTACCCCCA-----AAAGT-----CTAA----CCTTTC-----TTTTTATTGACATAAGCT  
CCTAGTTTATGTTACGATAGCCGAAACAAAACAA-TAAATAAAAAATTTAAATA

>Timmia\_austriaca\_5

AAATCGTGGTGCCTTGCACCTCGAATTGTAATCTGGAGAAGTGTCTCTGCAACGGACCAGACCCAAGTTCACCTGGAAAG  
TGGCGTCAGAGAGGGTGAAAACCCCGTCTGAGTCTGGACACTGTTGCAAAACGAGGCACTGTCTGCGAGTCCAGCTGTTTG  
GGAATGCAGCTCTAAGTGGGTGGTAAATTCATCCAAGGCTAAATATTGGCAAGAGACCGATAGCGAACAAGTACCGCGA  
GGGAAAGATGAAAAGGACTTTGAAAAGAGAGTTAAAAAGTGCTTGAAATTGCTGGGAGGGAAGCGAATGGAAGCTGCGGG  
TGTGCCCCGGTTGGATGTGGAACGGTTTAGGCTGGTCCGCCGCTCAACGCGGGGCACTGGTCAGCGTGGGCCATCGCGGC  
GGGACAAGAGCAGGATGTAGTTTCTGCTATGCGGTTGTGGTGGCCGAGGAACGAAGCATGCG-CCACTTGTGG-CGTG  
GTA--TTTATACCAACTGCATGCTCGGGACGCTGGCGTATTGAGCTCTTCATCCGACCCGTCTTGAAACACGGACCAAGG  
AGTCTAACATGTATGCGAGCCGGTGGGCGGCAAACCCATTGAGGCGCAAGTAACTGACA-TTT?A-AAAATTTGGAAGG  
AATAGAATTAGTTGCTGATTGTATTGAAAAAATA-----TTT-----AGTATCA  
-----ACTC-----GATCA-----TT  
TAATTATTGAGTAAATTTATTATCTTGAACCTTATTACTTATATATATATATAT-----AAGTATATAAAATAAAAAA-  
TTAAAAATTGTAACAAA-TAAATAT-----TTCTTATA-----GT  
ATAGAAAGATTATAAAATTATAAAGTGATTAAAATAAAAAAAAATTCTTG-----TTTACTTAAAAAAAAGAA  
ATTAGGCAATATTTTATTTTTTGTATTCTTTAATACGTTTTTAATTAAATTTTATTTTATTAAATAGTTTAAACATTCA

AAAGATTATTAGGTCAATGCTTAGAAAAATAAAAAATAATTTACTAAAAATAATCTGAGTTGCATCAAATATAAAAAATA  
ATATACAATGATAC-GTTTTGTTATAGGAAAA-TCAGTTTATCTAAAAAATAGACAAAATTAAATACCAAAGAAGTTTTT  
TTATAAGATT---AAAAGAAAAAACTTATTTGTCGAGTAGACCTCATCCTTGCAAGAGTTATCAATTGAG-AAAATTTTT  
AAAAAAAAAA?T??AAAATATATA?T??AAAATAAAAAAAATTAATAA-NNNNNN---NNNNNNNAGCTTTAGT  
AGAAAACTTACTAAATGCTAGCTTTTTCAGATTTCAGGGAACTTAGGTTGAAAAAGTATAAGCAATCCTGAGCCAAATTT  
TATTCCTTTAAAAATAAGATAGGTGCAGAGACTCAATGGAAGCTATCCTAACGAATAATATTTTAAGATTTTTTTT-AATTA  
AATAATTAATTAATAGAAATAAATTTAACTAAAATTTTATCTTTTATATATTAAGCGAGGATAAAGATAGAGTCCAATTT  
TACATGTTACTTTTAGCAACAATTTAAATTGTAGTAAAAAGAAAATCCGTTGGCTTTATTGACCGTGAGGGTTCAAGTCC  
CTCTACCCCCA-----AAAGT-----CTAA----CCTTTC-----TTTTATTGACATAAGCT  
CCTAGTTTATGTTACGATAGCCGAAACAAAACAC-TAAATAAAAAATTTAAATA

>Timmia\_austriaca\_6

AAATCGTGGTGCCTTGCACCTCGAATTGTAGTCTGGAGAAGTGTCTCTGCAACGGACCAGACCCAAGTTCCTGGAAG  
TGGCGTCAGAGAGGGTGAAAACCCCGTCGAGTCTGGACACTGTTGCAAAACGAGGCACTGTCTGCGAGTCGAGCTGTTTG  
GGAATGCAGCTCTAAGTGGGTGGTAAATTCATCCAAGGCTAAATATTGGCAAGAGACCGATAGCGAACAAGTACCGCGA  
GGGAAAGATGAAAAGGACTTTGAAAAGAGAGTTAAAAAGTGCTTGAAATTGCTGGGAGGGGAAGCGAATGGAAGCTGCGGG  
TGTGCCCCGGTTGGATGTGGAACGGTTTAGGCTGGTCCGCCGCTCAACGCGGGGCACTGGTCAGCGTGGGCCATCGCGGC  
GGGACAAGAGCAGGATGTAGTTTCTGCTATGCCGTTGTGGTGGCCGAGGAACGAAGCATGCG-CCACTTGTGG-CGTG  
GTA---TTTATACCAACTGCATGCTCGGGACGCTGGCGTATTGAGCTCTTCATCCGACCCGCTCTTGAAACACGGACCAAGG  
AGTCTAACATGTATGCGAGCCGGTGGGCGGCAAACCCATTGAGGCGCAAGTAACTGACA-TTT?A-AAAATTTGGAAGT  
AATAAAATTAGTTGCTGATTGTATTGAAAAAATA-----TTT-----AGTATCA  
-----ACTC-----GATCA-----TT  
TAATTATTGAGTAAAAATTATTATCTTGAACCTTATTACTTATATATATATAT-----AAGTATATAAAATAAAAAA-  
TTAAAAATTGTAACAAA-TAAATAT-----TTCTTATA-----GT  
ATAGAAAGATTATAAAATTATAAAGTGATTAAAAATAAAAAAAATTTCTTG-----TTTACTTAAAAAAAAGAA  
ATTAGGCAATATTTTATTTTTTGTATTCTTTAATACGTTTTTAATTAAATTTTATTTTATTAATTAGTTTAACATTCA  
AAAGATTATTAGGTCAATGCTTAGAAAAATAAAAAATAATTTACTAAAAATAATCTGAGTTGCATCAAATATAAAAAATA  
ATATACAATGATACTGTTTTGTTATAGGAAAA-TCAGTTTATCTAAAAAATAGACAAAATTAAATACCAAAGAAGTTTTT  
TTATAAGATT---AAAAGAAAAAACTTATTTGTCGAGTAGACCTCATCCTTGCAAGAGTTATCAATTGAG-AAAATTTTT  
AAAAAAAAAA?T??AAAATATATA?T??AAAATAAAAAAAATTAATAA-CTTAAA---TAATTTGAGCTTTAGT  
AGAAAACTTACTAAATGCTAGCTTTTTCAGATTTCAGGGAACTTAGGTTGAAAAAGTATAAGCAATCCTGAGCCAAATTT  
TATTCCTTTAAAAATAAGATAGGTGCAGAGACTCAATGGAAGCTATCCTAACGAATAATATTTTAAGATTTTTTTT-AATTA  
AATAATTAATTAATAGAAATAAATTTAACTAAAATTTTATCTTTTATATATTAAGCGAGGATAAAGATAGAGTCCAATTT  
TACATGTTACTTTTAGCAACAATTTAAATTGTAGTAAAAAGAAAATCCGTTGGCTTTATTGACCGTGAGGGTTCAAGTCC  
CTCTACCCCCA-----AAAGT-----CTAA----CCTTTC-----TTTTATTGACATAAGCT  
CCTAGTTTATGTTACGATAGCCGAAACAAAACAA-TAAATAAAAAATTTAAATA

>Timmia\_megapolitana\_1

AAATCGTGGTGCCTCGCACCTCGAGTTGTAGTCTGGAGAAGTGTCTCTGCAGCGGACCAGACCCAAGTTCCTGGAAG  
TGGCGTCAGAGAGGGTGAAAGCCCGCTCTAGTCTGGACACTGTTGCAAAACGAGGCACTGTCTGCGAGTCGAGCTGTTTG  
GGAATGCAGCTCTAAGTGGGTGGTAAATTCATCCAAGGCTAAATATTGGCAAGAGACCGATAGCGAACAAGTACCGCGA  
GGGAAAGATGAAAAGGACTTTGAAAAGAGAGTTAAAAAGTGCTTGAAATTGCTGGGAGGGGAAGCGAATGGAAGCTGCGGG  
TGTGCCCCGGTTGGATGTGGAACGGTTCAGGCTGGTCCGCCGCTCAACGCGGGGCACTGGTCAGCGTGGGCCATCGCGGC  
GGGACAAGAGCAGGATGTAGTTTCTGCTATGCCGTTGTGGTGGCCGAGGAACGAAGCATGCG-CCTCTTTTGG-CGTG  
GCATAATGATGCCAACTGCATGCTCGGGACGCTGGCGTATTGAGCTCTTCATCCGACCCGCTCTTGAAACACGGACCAAGG  
AGTCTAACATGTATGCGAGCCGGTGGGCGGCAAACCCATTGAGGCGCAAGTAACTGACA-TTAAA-AAAAGTTGAAAGT  
AATAAAATTAGTTGTTGATTGTATTGAAAAA-TA-----TTT-----AGTATCA  
-----ACTC-----GATCA-----TT  
TAATTATT-----ATCTTGAACCTTATTACTTATATATATATCTATATAT----AAGTAAATAAAATAAAAAA-  
TTAAAAATTCTAACAAA-TAAATAT-----TTCTTAAC-----GTATATTATATAGT  
ATAGAAAGATTCTGAAATTAGAAAGTGATTGAAATAAAAAA-TTCTTG-----TTTACTTAAAAAAAAGAA  
ATTAGGCAACATTTTATTTTTTGTATTCTTTAATAAATTTTAAATCAAAATTTTATTTTATTAATTAGTTTAACATCCA  
AAAGATTCTTAGGTCATGCTTAGAAAAATAAAAAATAATTTACTAAAAATAATCTGAGTTGCATCAAATATAAAAAATA  
ATATACAATGATAC-GTTTTGTTAGAGGAAAA-TGAGTTTATCTAAAAAATAAACAAAATTAAATCAAGAAGTTTTTT  
TTATAAGATTAAAAAAG-AAAACTTATTTGTCGAGCAGATCTCA-CCTTCCAAGAGTTATCAATTGAG-AAATTTTTT  
AATAAAAAAAAT?AAAATATATATA?AAAAATTAAAAAAAATTAATAAATT-CTTAAA---TAATTTGAGCTTTAGT  
AGAAAACTTACTAAATGCTAGTTTTTCAGATTTCAGGGAACTTAGGTTGAAAAAATATAAGCAATCCTGAGCCAAATTT  
TATTTATTAAAAAATAAGATAGGTGCAGAGACTCAATGGAAGCTATCCTAACGAATAATGTTTTAAGACTTTTTTTAATTA  
AATAATTAATTAATAAAAAATAAATTTAACTAAAATTTTATCTTTTATATATTAACGAGGATAAAGATAGAGTCCAATTT  
TACATGTTATTTTTTAGCAACAATTTAAATTGTGGTAAAAAGAAAATCCGTTGGCTTTATTGACCGTGAGGGTTCAAGTCC

CTCTACCCCCA-----AAAAT-----CTAA-----CTT-----TTTTCTTGACATAAGCT  
TCTAATTTATGTTACGATAGCCGAGACGAAACAA-TAAAAAAAATT?TAT?A

>Timmia\_megapolitana\_2

AAATCGTGGTGCCTCGCACCTCGAGTTGTAATCTGGAGAAGTGTCTCTGCAGCGGACCAGACCCAAGTTCACCTGGAAG  
TGGCGTCAGAGAGGGTGAAAGCCCCGTCTAGTCTGGACACTGTTGCAAAACGAGGCACTGTCTGCGAGTCGAGCTGTTTG  
GGAATGCAGCTGTAAGTGGGTGGTAAATTCCATCCAAGGCTAAATATTGGCAAGAGACCGATAGCGAACAAGTACCGCGA  
GGGAAAGATGAAAAGGACTTTGAAAAGAGAGTTAAAAAGTGCTTGAAATTGCTGGGAGGGAAGCGAATGGAAGCTGCGGG  
TGTGCCCCGGTTGGATGTGGAACGGTTCAGGCTGGTCCGCCGCTCAACGCGGGGCACTGGTCAGCGTGGGCCATCGCGGC  
GGGACAAGAGCGGGATGTAGTTTCTGCCTATGCCGTTGTGGTGGCCGAGGAACGAAGCATGCG-CCTCTTTTGG-CGTG  
GCATAATGATGCCAACTGCATGCTCGGGACGCTGGCGTATTGAGCTCTTCATCCGACCCGTCTTGAAACACGGACCAAGG  
AGTCTAACATGTATGCGAGCCGGTGGGCGGCAAACCCATTGAGGCGCAAGTAAACTGACA-TTAAA-AAAAGTTGAAAGT  
AATAAAATTAGTTGTTGATTGTATTGAAAAAA-TA-----TTT-----AGTATCA  
-----ACTC-----GATCA-----TT  
TAATTATT-----ATCTTGAACCTTATTACTTATATATATCTATATAT----AAGTAAATAAAATAAAAAAA-  
TTAAAAATTCTAACAAA-TAAATAT-----TTCTTAAC-----GTATATTATATAGT  
ATAGAAAGATTCTGAAATTAGAAAGTGATTGAAATAAAAAAA-TTCTTG-----TTTACTTAAAAAAAAGAA  
ATTAGGCAACATTTTATTTTTTGTATTTCCTTAATAAATTTTTAATCAAAATTTTATTTTATTAATTAGTTTAAACATCCA  
AAAGATTCTTAGGTCAATGCTTAGAAAAATAAAAAATAATTTACTAAAAATAATCTGAGTTGCATCAAAATATAAAAAATA  
ATATACAATGATAC-GTTTTGTAGAGGAAAA-TGAGTTTATCTAAAAATAAACAAAATTAAATATCAAAGAAGTTTTT  
TTATAAGATTAAAAAAG-AAAACTTATTTGTCGAGCAGATCTCA-CCTTCCAAGAGTTATCAATTGAG-AAATTTTTT  
AATAAAAAAAT??AAAATATATATA?AAAAATTAAAAAAAATTAAAAAATT-CTTAAA---TAATTTGAGCTTTAGT  
AGAAAACTTACTAAATGCTAGTTTTTCTAGATTCAGGGAACTTAGGTTGAAAAAATATAAGCAATCCTGAGCCAAATTT  
TATTTATTAAAAATAAGATAGGTGCAGAGACTCAATGGAAGCTATCCTAACGAATAATGTTTTAAGACTTTTTTTAATTA  
AATAATTAATTAATAAAAAATAAATTTAACTAAAAATTTTATCTTTTATATATTAAACGAGGATAAAGATAGAGTCCAATTT  
TACATGTTATTTTGTAGCAACAATTTAAATTGTGGTAAAAAGAAAATCCGTTGGCTTTATTGACCGTGAGGGTTCAAGTCC  
CTCTACCCCCA-----AAAAT-----CTAA-----CTT-----TTTTCTTGACATAAGCT  
TCTAATTTATGTTACGATAGCCGAGACGAAACAA-TAAAAAAAATT?TAT?A

>Timmia\_megapolitana\_3

AAATCGTGGTGCCTCGCACCTCGAGTTGTAGTCTGGAGAAGTGTCTCTGCAGCGGACCAGACCCAAGTTCACCTGGAAG  
TGGCGTCAGAGAGGGTGAAAGCCCCGTCTAGTCTGGACACTGTTGCAAAACGAGGCACTGTCTGCGAGTCGAGCTGTTTG  
GGAATGCAGCTCTAAGTGGGTGGTAAATTCCATCCAAGGCTAAATATTGGCAAGAGACCGATAGCGAACAAGTACCGCGA  
GGGAAAGATGAAAAGGACTTTGAAAAGAGAGTTAAAAAGTGCTTGAAATTGCTGGGAGGGAAGCGAATGGAAGCTGCGGG  
TGTGCCCCGGTTGGATGTGGAACGGTTCAGGCTGGTCCGCCGCTCAACGCGGGGCACTGGTCAGCGTGGGCCATCGCGGC  
GGGACAAGAGCGGGATGTAGTTTCTGCCTATGCCGTTGTGGTGGCCGAGGAACGAAGCATGCG-CCTCTTTTGG-CGTG  
GCATAATGATGCCAACTGCATGCTCGGGACGCTGGCGTATTGAGCTCTTCATCCGACCCGTCTTGAAACACGGACCAAGG  
AGTCTAACATGTATGCGAGCCGGTGGGCGGCAAACCCATTGAGGCGCAAGTAAACTGACA-TTAAA-AAAAGTTGAAAGT  
AATAAAATTAGTTGTTGATTGTATTGAAAAAA-TA-----TTT-----AGTATCA  
-----ACTC-----GATCA-----TT  
TAATTATT-----ATCTTGAACCTTATTACTTATATATATCTATATAT----AAGTAAATAAAATAAAAAAA-  
TTAAAAATTCTAACAAA-TAAATAT-----TTCTTAAC-----GTATATTATATAGT  
ATAGAAAGATTCTGAAATTAGAAAGTGATTGAAATAAAAAAA-TTCTTG-----TTTACTTAAAAAAAAGAA  
ATTAGGCAACATTTTATTTTTTGTATTTCCTTAATAAATTTTTAATCAAAATTTTATTTTATTAATTAGTTTAAACATCCA  
AAAGATTCTTAGGTCAATGCTTAGAAAAATAAAAAATAATTTACTAAAAATAATCTGAGTTGCATCAAAATATAAAAAATA  
ATATACAATGATAC-GTTTTGTAGAGGAAAA-TGAGTTTATCTAAAAATAAACAAAATTAAATATCAAAGAAGTTTTT  
TTATAAGATTAAAAAAG-AAAACTTATTTGTCGAGCAGATCTCA-CCTTCCAAGAGTTATCAATTGAG-AAATTTTTT  
AATAAAAAAAT??AAAATATATATA?AAAAATTAAAAAAAATTAAAAAATT-NNNNNN---NNNNNNNNNNNNNNNN  
NNNNNNNNNNNNNNNTGCTAGTTTTTCTAGATTCAGGGAACTTAGGTTGAAAAAATATAAGCAATCCTGAGCCAAATTT  
TATTTATTAAAAATAAGATAGGTGCAGAGACTCAATGGAAGCTATCCTAACGAATAATGTTTTAAGACTTTTTTTAATTA  
AATAATTAATTAATAAAAAATAAATTTAACTAAAAATTTTATCTTTTATATATTAAACGAGGATAAAGATAGAGTCCAATTT  
TACATGTTATTTTGTAGCAACAATTTAAATTGTGGTAAAAAGAAAATCCGTTGGCTTTATTGACCGTGAGGGTTCAAGTCC  
CTCTACCCCCA-----AAAAT-----CTAA-----CTT-----TTTTCTTGACATAAGCT  
TCTAATTTATGTTACGATAGCCGAGACGAAACAA-TAAAAAAAATT?TAT?A

>Timmia\_megapolitana\_4

AAATCGTGGTGCCTTGCACCTCGAATTGTAATCTGGAGAAGTGTCTCTGCAACGGACCAGACCCAAGTTCACCTGGAAG  
TGGCGTCAGAGAGGGTGAAAGCCCCGTGAGTCTGGATGCTGTTGCAAAACGAGGCACTGTCTGCGAGTCGAGCTGTTTG  
GGAATGCAGCTCTAAGTGGGTGGTAAATTCCATCCAAGGCTAAATATTGGCAAGAGACCGATAGCGAACAAGTACCGCGA  
GGGAAAGATGAAAAGGACTTTGAAAAGAGAGTTAAAAAGTGCTTGAAATTGCTGGGAGGGAAGCGAATGGAAGCTGCGGG  
TGTGCCCCGGTTGGATGTGGAACGGTTCAGGCTGGTCCGCCGCTCAACGCGGGGCACTGGTCAGCGTGGGCCACCGCGGC

GGGACAAGAGCGGGATGTAGTTTCCTGCCTATGCCGTTGTGGTGGCCGAGGAACGAAGCGTGCG-CCTCTTGTGG-CGTG  
GTATAATGATGCCAACTGCATGCTCGGGACGCTGGCGTATTGAGCTCTTCATCCGACCCGTCTTGAAACACGGACCAAGG  
AGTCTAACATGTATGCGAGCCGGTGGGCGGCAAACCCATTGAGGCGCAAGTAAACTGACA-TTAAA-AAAATTTGGAAGT  
AATAAAATTAGTTGCTGATTGTATTGAAAAA-TA-----TTT-----AGTATCA  
-----ACTC-----GATCA-----TT  
TAATTATTGAGTAAATATTATCTTGAACCTATTACTTATATATATAT-----AAGTAAATAAAATAAAAAA-  
TTAAAAATTCTAACAAA-TAAATAT-----TTCTTAAA-----GTATA-TATA--GT  
ATAGAAAGATTCTGAAATTAGAAAGTGATTGAAATAAAAAAAATTTCTTA-----TTTACTTAAAAAAAAGAA  
ATTAGGCAACATTTTATTTTTTGTATTCTTAATACGTTTTTAATCAAATTTTATTTTATTAATTAGTTTAAACATCCA  
AAAGATTCTTAGGTCAATGCTTAGAAAAATAAAAAAGAATTTACTAAAAATAATTTGAGTTGCATCAAAGATAAAAAATA  
ATATACAATGATAC-GTTTTGTTAGAGGAAAA-TCAGTTTATCTAAAGAATAAACAAAATTAAATATCAAAGAAGTTTTT  
TTATAAGATTAAAAAAGAAAAAAGCTTATTTGTCGAGCAGATCTCATCCTTGCAAGAATTATCAATTGAG-AAATTTTTT  
AAAAAAAAT?????AAAATATATATA?TTAAAAATAAAAAAAATTAAAAAA-CTTAAA---TAATTTGAGCTTTAGT  
AGAAAACTTACTAAATGCTAGTTTTTCTAGATTCAGGGAACTTAGGTTGAAAAAATATAAGCAATCCTGAGCCAAATTT  
TATTTATTAAAAAATAAGATAGGTGCAGAGACTCAATGGAAGCTATCCTAACGAATAATGTTTTAAGACTTTTTTTTTATTA  
AATAATTAATTAATAAAAAATAATTTAACTAAAATTTTATCTTTTATATATTAACGAGGATAAAGATAGAGTCCAATTT  
TACATGTTATTTTGTAGCAACAATTTAAATTGTGGTAAAAAGAAAAATCCGTTGGCTTTATTGACCGTGAGGGTTCAAGTCC  
CTCTACCCCCA-----AAAAT-----CTAA-----CTT-----TTTTCTTGACATAAGCT  
TCTAGTTTATGTTACGATAACCGAGACGAAACAA-TAAAAAAAATT?TAT?A

>Timmia\_bavarica\_1

NNNNNNNNNNNNNNNNNNNNNNNNNNNNNNNNNNNNNNNNNNNNNAGAAGCGTCTCTGCAACGGACCAGACCCAAGTTCACTGGAAAG  
TGGCGTCAGAGAGGGTGAAAACCCCGTCGAGTCTGGACACTGTTGCAAAACGAGGCGCTGTCTGCGAGTCGAGCTGTTTG  
GGAATGCAGCTCTAAGTGGGTGGTAAATTCATCCAAGGCTAAATATTGGCAAGAGACCGATAGCGAACAAGTACCGCGA  
GGGAAAGATGAAAAGGACTTTGAAAAGAGAGTTAAAAAGTGCTTGAAATGCTGGGAGGGAAGCGAATGGAAGCTGCGGG  
TGTGCCCCGGTTGGATGTGGAACGGTTCAGGCTGGTCCGCCGCTCAACGCGGGGCGCTGGTCAGCGTGCGGCCATCGCGGC  
GGGACAAGAGCGGGATGTAGTTTCCTGCCTATGCCGTTGCGGTGGCCGAGGAACGAAGCGTGCG-CCACTCGTGG-CGTG  
GTAC-TTCGTACCAACTGCACGCTCGGGACGCTGGCGTATTGAGCTCTTCATCCGACCCGTCTNNNNNNNNNNNNNNNNNN  
NNNNNNNNNNNNNNNNNNNNNNNNNNNNNNNNNNNNNNNNNNNNNNNNNNNNNNNNNNNNNNNNNNNNNNNNNNNNNN  
NNNNNNNNNNNNNNNNNNNNNNNNNNNNNNNNNNNNNNNNNNNNNNNNNNNNNNNNNNNNNNNNNNNNNNNNNNNN  
AATGAAATTAGTTGCTGATTGTATTGAAAAA-TA-----TTT-----AGTATCA  
-----ACTC-----GATCA-----TT  
TAATTATTGAGTAAATGATTATCTTGAACCTATTACTTATATAT-----AAGTAAATAAAATAAAAAA-  
TTAAAAATTCTAACAAA-TAAATAT-----TTCTTAAAGTATATAAATATTTCTTAAAGTATA-TATA--GT  
ATAGAAAGATTATGAAATTAGAAAGTGATTGAAATAAAAAA-TTCTTG-----TTTACTTAAAAAAAAGAA  
ATTAGGCAACATTTCTTTTTTGTATTCTTTAATACGTTTTTAATCAAATTTTATTTTATTAATTAGTTTAAACATCCA  
AAAGATTCTTAGGTCAATGCTTAGAAAAATAAAAAATAATTTACTAAAAATAATCTGAGTTGCATCAAATATAAAAAATA  
ATATACAATGATAC-GTTTTGTTATAGGAAAA-TGAGTTTATCTAAAAATAAACAAAATGAAATATCAAAGAAGTTTTT  
TTATAAGATT---AAAAGAAAAAAGCTTATTTGTCGAGCAGACCTTATCTTGCAAGAGTTATCAATTGAG-AAATTTTTT  
AAAAAAT?????AAAATATATAAAATTAAATTAAAAAAAATTAATAA-CTTAAA---TAATTTGAGCTTTAGT  
AGAAAACTTACTAAATGCTAGTTTTTCTAGATTCAGGGAACTTAGGTTGAAAAAATATAAGCAATCCTGAGCCAAATTT  
TATTTCTTTAAAAATAAGATAGGTGCAGAGACTCAATGGAAGCTATCCTAACGAATAATGTTTTAAGATTTTTTT-TATTA  
AATAATTAATTAATAAAAAATAATTTAACTAAAATTTTATCTTTTATATATTAAGCGAGGATAAAGATAGAGTCCAATTT  
TACATGTTATTTTGTAGCAACAATTTAAATTGTGGTAAAAAGAAAAATCCGTTGGCTTTATTGACCGTGAGGGTTCAAGTCC  
CTCTACCCCCA-----AAAAT-----CTAA-----CTT-----TTTTCTTGACATAAGCT  
TCTAATTTATGTTACGATAGCCGAGACGAAACAA-TAAATAAAAAATT?TAT?A

>Timmia\_bavarica\_2

AAATCGTGGTGCCTCGCACCTCGAATTGTAGTCTGGAGAAGCGTCTCTGCAACGGACCAGACCCAAGTTCACTGGAAAG  
TGGCGTCAGAGAGGGTGAAAACCCCGTCGAGTCTGGACACTGTTGCAAAACGAGGCGCTGTCTGCGAGTCGAGCTGTTTG  
GGAATGCAGCTCTAAGTGGGTGGTAAATTCATCCAAGGCTAAATATTGGCAAGAGACCGATAGCGAACAAGTACCGCGA  
GGGAAAGATGAAAAGGACTTTGAAAAGAGAGTTAAAAAGTGCTTGAAATGCTGGGAGGGAAGCGAATGGAAGCTGCGGG  
TGTGCCCCGGTTGGATGTGGAACGGTTCAGGCTGGTCCGCCGCTCAACGCGGGGCGCTGGTCAGCGTGCGGCCATCGCGGC  
GGGACAAGAGCGGGATGTAGTTTCCTGCCTATGCCGTTGCGGTGGCCGAGGAACGAAGCGTGCG-CCACTCGTGG-CGTG  
GTA--CTCGTACCAACTGCACGCTCGGGACGCTGGCGTATTGAGCTCTTCATCCGACCCGTCTTGAAACACGGACCAAGG  
AGTCTAACATGTATGCGAGCCGGTGGGCGGCAAACCCATTGAGGCGCAAGTAAACTGACA-TTT?A-AAAATTTAGAGT  
AATGAAATTAGTTGCTGATTGTATTGAAAAA-TA-----TTT-----AGTATCA  
-----ACTC-----GATCA-----TT  
TAATTATTGAGTAAATGATTATCTTGAACCTATTACTTATATAT-----AAGTAAATAAAATAAAAAA-  
TTAAAAATTCTAACAAA-TAAATAT-----TTCTTAAA-----GTATA-TATA--GT  
ATAGAAAGATTATGAAATTAGAAAGTGATTGAAATAAAAAA-TTCTTG-----TTTACTTAAAAAAAAGAA



ATTAGGCAACATTTTCTTTTTTGTATTCTTTAATACGTTTTTAATCAAATTTTATTTTATTAATTAGTTTAAACATCCA  
AAAGATTCTTAGGTCAATGCTTAGAAAAATAAAAAATAATTTACTAAAAATAATCTGAGTTGCATCAAATATAAAAAATA  
ATATACAATGATAC-GTTTTGTTATAGGAAAA-TGAGTTTATCTAAAAATAAACAAAATGAAATATCAAAGAAGTTTTT  
TTATAAGATT---AAAAGAAAAAACTTATTTGTCGAGCAGACCTTATTCTTGCAAGAGTTATCAATTGAG-AAATTTTTT  
AAAAAAT??????AAAATATATATA?TAAATTAAAAAAAATTAATAATAA-CTTAAA---TAATTTGAGCTTTAGT  
AGAAAACTTACTAAATGCTAGTTTTTCAGATTCAGGGAACTTAGGTTGAAAAAATATAAGCAATCCTGAGCCAAATTT  
TATTCTTTAAAAATAAGATAGGTGCAGAGACTCAATGGAAGCTATCCTAACGAATAATGTTTTAAGATTTTTTTT-TATTA  
AATAATTAATTAATAAAAAATAAATTTAACTAAAACCTTTATCTTTTATATATTAAGCGAGGATAAAGATAGAGTCCAATTT  
TACATGTTATTTTTTAGCAACAATTTAAATTGTGGTAAAAAGAAAATCCGTTGGCTTTATTGACCGTGAGGGTTCAAGTCC  
CTCTACCCCCA-----AAAAT-----CTAA-----CTT-----TTTTCTTGACATAAGCT  
TCTAATTTATGTTACGATAGCCGAGACGAAACAA-TAAATAAAAAATT?TAT?A

>Timmia\_bavarica\_3

AAATCGTGCTGCGCTCGCACCTCGAATTGTAATCTGGAGAAGCGTCCTCTGCAACGGACCAGACCCAAGTTCCTGGAAG  
TGGCGTCAGAGAGGGTGAAAACCCCGTCGAGTCTGGACACTGTTGCAAAACGAGGCGCTGTCTGCGAGTCGAGCTGTTTG  
GGAATGCAGCTCTAAGTGGGTGGTAAATTCATCCAAGGCTAAATATTGGCAAGAGACCGATAGCGAACAAGTACCGCGA  
GGGAAAGATGAAAAGGACTTTGAAAAGAGAGTTAAAAAGTGCTTGAAATTGCTGGGAGGGAAGCGAATGGAAGCTGCGGG  
TGTGCCCCGGTTGGATGTGGAACGGTTCAGGCTGGTCCGCCGCTCAACGCGGGGCGCTGGTCAGCGTGCGGCCATCGCGGC  
GGGACAAGAGCGGGATGTAGTTTCTGCTATGCCGTTGCGGTGGCCGAGGAACGAAGCGTGCG-CCACTCGTGG-CGTG  
GTA--CTCGTACCAACTGCACGCTCGGGACGCTGGCGTATTGAGCTCTTCATCCGACCCGCTCTTGAAACACGGACCAAGG  
AGTCTAACATGTATGCGAGCCGGTGGGCGGCAAACCCATTGAGGCGCAAGTAACTGACA-TTT?A-AAAATTTAGAAGT  
AATGAAATTAGTTGCTGATTGTATTGAAAAA-TA-----TTT-----AGTATCA  
-----ACTC-----GATCA-----TT

TAATTATTGAGTAAAAATGATTATCTTGAACCTTATTACTTATATAT-----AAGTAAATAAAATAAAAAA-  
TTAAAAATTCTAACAAA-TAAATAT-----TTCTTAAA-----GTATA-TATA--GT  
ATAGAAAGATTATGAAATTAGAAAGTGATTGAAATAAAAAA-TTCTTG-----TTACTTAAAAAAGAA  
ATTAGGCAACATTTTCTTTTTTGTATTCTTTAATACGTTTTTAATCAAATTTTATTTTATTAATTAGTTTAAACATCCA  
AAAGATTCTTAGGTCAATGCTTAGAAAAATAAAAAATAATTTACTAAAAATAATCTGAGTTGCATCAAATATAAAAAATA  
ATATACAATGATAC-GTTTTGTTATAGGAAAA-TGAGTTTATCTAAAAATAAACAAAATGAAATATCAAAGAAGTTTTT  
TTATAAGATT---AAAAGAAAAAACTTATTTGTCGAGCAGACCTTATTCTTGCAAGAGTTATCAATTGAG-AAATTTTTT  
AAAAAAT??????AAAATATATATA?TAAATTAAAAAAAATTAATAATAA-CTTAAA---TAATTTGAGCTTTAGT  
AGAAAACTTACTAAATGCTAGTTTTTCAGATTCAGGGAACTTAGGTTGAAAAAATATAAGCAATCCTGAGCCAAATTT  
TATTCTTTAAAAATAAGATAGGTGCAGAGACTCAATGGAAGCTATCCTAACGAATAATGTTTTAAGATTTTTTTT-TATTA  
AATAATTAATTAATAAAAAATAAATTTAACTAAAACCTTTATCTTTTATATATTAAGCGAGGATAAAGATAGAGTCCAATTT  
TACATGTTATTTTTTAGCAACAATTTAAATTGTGGTAAAAAGAAAATCCGTTGGCTTTATTGACCGTGAGGGTTCAAGTCC  
CTCTACCCCCA-----AAAAT-----CTAA-----CTT-----TTTTCTTGACATAAGCT  
TCTAATTTATGTTACGATAGCCGAGACGAAACAA-TAAATAAAAAATT?TAT?A

>Timmia\_bavarica\_4

AAATCGTGCTGCGCTCGCACCTCGAATTGTAGTCTGGAGAAGCGTCCTCTGCAACGGACCAGACCCAAGTTCCTGGAAG  
TGGCGTCAGAGAGGGTGAAAACCCCGTCGAGTCTGGACACTGTTGCAAAACGAGGCGCTGTCTGCGAGTCGAGCTGTTTG  
GGAATGCAGCTCTAAGTGGGTGGTAAATTCATCCAAGGCTAAATATTGGCAAGAGACCGATAGCGAACAAGTACCGCGA  
GGGAAAGATGAAAAGGACTTTGAAAAGAGAGTTAAAAAGTGCTTGAAATTGCTGGGAGGGAAGCGAATGGAAGCTGCGGG  
TGTGCCCCGGTTGGATGTGGAACGGTTCAGGCTGGTCCGCCGCTCAACGCGGGGCGCTGGTCAGCGTGCGGCCATCGCGGC  
GGGACAAGAGCGGGATGTAGTTTCTGCTATGCCGTTGCGGTGGCCGAGGAACGAAGCGTGCG-CCACTCGTGG-CGTG  
GTA--CTCGTACCAACTGCACGCTCGGGACGCTGGCGTATTGAGCTCTTCATCCGACCCGCTCTTGAAACACGGACCAAGG  
AGTCTAACATGTATGCGAGCCGGTGGGCGGCAAACCCATTGAGGCGCAAGTAACTGACA-TTT?A-AAAATTTAGAAGT  
AATGAAATTAGTTGCTGATTGTATTGAAAAA-TA-----TTT-----AGTATCA  
-----ACTC-----GATCA-----TT

TAATTATTGAGTAAAAATGATTATCTTGAACCTTATTACTTATATAT-----AAGTAAATAAAATAAAAAA-  
TTAAAAATTCTAACAAA-TAAATAT-----TTCTTAAA-----GTATA-TATA--GT  
ATAGAAAGATTATGAAATTAGAAAGTGATTGAAATAAAAAA-TTCTTG-----TTACTTAAAAAAGAA  
ATTAGGCAACATTTTCTTTTTTGTATTCTTTAATACGTTTTTAATCAAATTTTATTTTATTAATTAGTTTAAACATCCA  
AAAGATTCTTAGGTCAATGCTTAGAAAAATAAAAAATAATTTACTAAAAATAATCTGAGTTGCATCAAATATAAAAAATA  
ATATACAATGATAC-GTTTTGTTATAGGAAAA-TGAGTTTATCTAAAAATAAACAAAATGAAATATCAAAGAAGTTTTT  
TTATAAGATT---AAAAGAAAAAACTTATTTGTCGAGCAGACCTTATTCTTGCAAGAGTTATCAATTGAG-AAATTTTTT  
AAAAAAT??????AAAATATATATA?TAAATTAAAAAAAATTAATAATAA-CTTAAA---TAATTTGAGCTTTAGT  
AGAAAACTTACTAAATGCTAGTTTTTCAGATTCAGGGAACTTAGGTTGAAAAAATATAAGCAATCCTGAGCCAAATTT  
TATTCTTTAAAAATAAGATAGGTGCAGAGACTCAATGGAAGCTATCCTAACGAATAATGTTTTAAGATTTTTTTT-TATTA  
AATAATTAATTAATAAAAAATAAATTTAACTAAAACCTTTATCTTTTATATATTAAGCGAGGATAAAGATAGAGTCCAATTT

TACATGTTATTTTTAGCAACAATTTAAATTGTGGTAAAAAGAAAATCCGTTGGCTTTATTGACCGTGAGGGTTCAAGTCC  
CTCTACCCCCA-----AAAAT-----CTAA-----CTT-----TTTTCTTGACATAAGCT  
TCTAATTTATGTTACGATAGCCGAGACGAAACAA-TAAATAAAAAATT?TAT?A

>Timmia\_bavarica\_5

AAATCGTGGTGCCTCGCACCTCGAATTGTAGTCTGGAGAAGCGTCCTCTGCAACGGACCAGACCCAAGTTCACCTGGAAG  
TGGCGTCAGAGAGGGTGAAAACCCCGTCGAGTCTGGACACTGTTGCAAAACGAGGCGCTGTCTGCGAGTCGAGCTGTTTG  
GGAATGCAGCTCTAAGTGGGTGGTAAATTCCATCCAAGGCTAAATATTGGCAAGAGACCGATAGCGAACAAGTACCGCGA  
GGGAAAGATGAAAAGGACTTTGAAAAGAGAGTTAAAAAGTGCTTGAAATTGCTGGGAGGGAAGCGAATGGAAGCTGCGGG  
TGTGCCCCGGTTGGATGTGGAACGGTTCAGGCTGGTCCGCCGCTCAACGCGGGGCGCTGGTCAGCGTGGGCCATCGCGGC  
GGGACAAGAGCGGGATGTAGTTTCCTGCCTATGCCGTTGCGGTGGCCGAGGAACGAAGCGTGCG-CCACTCGTGG-CGTG  
GTA--CTCGTACCAACTGCACGCTCGGGACGCTGGCGTATTGAGCTCTTCATCCGACCCGCTCTTGAAACACGGACCAAGG  
AGTCTAACATGTATGCGAGCCGGTGGGCGGCAAACCCATTGAGGCGCAAGTAAACTGACA-TTT?A-AAAATTTAGAAGT  
AATGAAATTAGTTGCTGATTGTATTGAAAAAA-TA-----TTT-----AGTATCA  
-----ACTC-----GATCA-----TT  
TAATTATTGAGTAAAAATGATTATCTTGAACCTTATTACTTATATAT-----AAGTAAATAAAATAAAAAAA-  
TTAAAAATTCTAACAAA-TAAATAT-----TTCTTAAAGTATAT-----GTATA-TATA--GT  
ATAGAAAGATTATGAAATTAGAAAGTGATTGAAATAAAAAAA-TTCTTG-----TTTACTTAAAAAAAAGAA  
ATTAGGCAACATTTTCTTTTTTGTATTCTTTAATACGTTTTTAATCAAATTTTATTTTTATTAATTAGTTTAACATCCA  
AAAGATTCTTAGGTCAATGCTTAGAAAAATAAAAAATAATTTACTAAAAATAATCTGAGTTGCATCAAATATAAAAAATA  
ATATACAATGATAC-GTTTTGTTATAGGAAAA-TGAGTTTATCTAAAAATAAACAAAATGAAATATCAAAGAAGTTTTT  
TTATAAGATT---AAAAGAAAAAACTTATTTGTCGAGCAGACCTTATTCTTGCAAGAGTTATCAATTGAG-AAATTTTTT  
AAAAAAT?????AAAATATATAAATTTAAATTAAAAAAAATTAATAA-NNNNNN--NNNNNNNNNNNNNNNN  
NNNAAACTTACTAAATGCTAGTTTTCAGATTCAGGGAACTTAGGTTGAAAAAATATAAGCAATCCTGAGCCAAATTT  
TATTCTTTTAAAAATAAGATAGGTGCAGAGACTCAATGGAAGCTATCCTAACGAATAATGTTTTAAGATTTTTTT-TATTA  
AATAATTAATTAATAAAAAATAAATTTAACTAAACCTTTATCTTTTATATATTAAGCGAGGATAAAGATAGAGTCCAATTT  
TACATGTTATTTTTAGCAACAATTTAAATTGTGGTAAAAAGAAAATCCGTTGGCTTTATTGACCGTGAGGGTTCAAGTCC  
CTCTACCCCCA-----AAAAT-----CTAA-----CTT-----TTTTCTTGACATAAGCT  
TCTAATTTATGTTACGATAGCCGAGACGAAACAA-TAAATAAAAAATT?TAT?A

>Timmia\_bavarica\_6

AAATCGTGGTGCCTCGCACCTCGAATTGTAGTCTGGAGAAGCGTCCTCTGCAACGGACCAGACCCAAGTTCACCTGGAAG  
TGGCGTCAGAGAGGGTGAAAACCCCGTCGAGTCTGGACACTGTTGCAAAACGAGGCGCTGTCTGCGAGTCGAGCTGTTTG  
GGAATGCAGCTCTAAGTGGGTGGTAAATTCCATCCAAGGCTAAATATTGGCAAGAGACCGATAGCGAACAAGTACCGCGA  
GGGAAAGATGAAAAGGACTTTGAAAAGAGAGTTAAAAAGTGCTTGAAATTGCTGGGAGGGAAGCGAATGGAAGCTGCGGG  
TGTGCCCCGGTTGGATGTGGAACGGTTCAGGCTGGTCCGCCGCTCAACGCGGGGCGCTGGTCAGCGTGGGCCATCGCGGC  
GGGACAAGAGCGGGATGTAGTTTCCTGCCTATGCCGTTGCGGTGGCCGAGGAACGAAGCGTGCG-CCACTCGTGG-CGTG  
GTA--CTCGTACCAACTGCACGCTCGGGACGCTGGCGTATTGAGCTCTTCATCCGACCCGCTCTTGAAACACGGACCAAGG  
AGTCTAACATGTATGCGAGCCGGTGGGCGGCAAACCCATTGAGGCGCAAGTAAACTGACA-TTT?A-AAAATTTAGAAGT  
AATGAAATTAGTTGCTGATTGTATTGAAAAAA-TA-----TTT-----AGTATCA  
-----ACTC-----GATCA-----TT  
TAATTATTGAGTAAAAATGATTATCTTGAACCTTATTACTTATATAT-----AAGTAAATAAAATAAAAAAA-  
TTAAAAATTCTAACAAA-TAAATAT-----TTCTTAAA-----GTATA-TATA--GT  
ATAGAAAGATTATGAAATTAGAAAGTGATTGAAATAAAAAAA-TTCTTG-----TTTACTTAAAAAAAAGAA  
ATTAGGCAACATTTTCTTTTTTGTATTCTTTAATACGTTTTTAATCAAATTTTATTTTTATTAATTAGTTTAACATCCA  
AAAGATTCTTAGGTCAATGCTTAGAAAAATAAAAAATAATTTACTAAAAATAATCTGAGTTGCATCAAATATAAAAAATA  
ATATACAATGATAC-GTTTTGTTATAGGAAAA-TGAGTTTATCTAAAAATAAACAAAATGAAATATCAAAGAAGTTTTT  
TTATAAGATT---AAAAGAAAAAACTTATTTGTCGAGCAGACCTTATTCTTGCAAGAGTTATCANNNNNN-AAATTTTTT  
AAAAAAT?????AAAATATATATA?TAAATTAAAAAAAATTAATAA-CTTAAA---TAATTTGAGCTTTAGT  
AGAAAAACTTACTAAATGCTAGTTTTTCAGATTCAGGGAACTTAGGTTGAAAAAATATAAGCAATCCTGAGCCAAATTT  
TATTCTTTTAAAAATAAGATAGGTGCAGAGACTCAATGGAAGCTATCCTAACGAATAATGTTTTAAGATTTTTTT-TATTA  
AATAATTAATTAATAAAAAATAAATTTAACTAAACCTTTATCTTTTATATATTAAGCGAGGATAAAGATAGAGTCCAATTT  
TACATGTTATTTTTAGCAACAATTTAAATTGTGGTAAAAAGAAAATCCGTTGGCTTTATTGACCGTGAGGGTTCAAGTCC  
CTCTACCCCCA-----AAAAT-----CTAA-----CTT-----TTTTCTTGACATAAGCT  
TCTAATTTATGTTACGATAGCCGAGACGAAACAA-TAAATAAAAAATT?TAT?A

>Timmia\_bavarica\_8

AAATCGTGGTGCCTCGCACCTCGAGTTGTAGTCTGGAGAAGCGTCCTCTGCAACGGACCAGACCCAAGTTCACCTGGAAG  
TGGCGTCAGAGAGGGTGAAAACCCCGTCGAGTCTGGGCACTGTTGCAAAACGAGGCGCTGTCTGCGAGTCGAGCTGTTTG  
GGAATGCAGCTCTAAGTGGGTGGTAAATTCCATCCAAGGCTAAATATTGGCAAGAGACCGATAGCGAACAAGTACCGCGA  
GGGAAAGATGAAAAGGACTTTGAAAAGAGAGTTAAAAAGTGCTTGAAATTGCTGGGAGGGAAGCGAATGGAAGCTGCGGG

TGTGCCCCGGTTGGATGTGGAACGGTTCAGGCTGGTCCGCCGCTCAACGCGGGGCACTGGTCAGCGTGGGCCATCGCGGC  
GGGACAAGAGCGGGATGTAGTTTCTGCCTATGCCGTTGCGGTGGCCGAGGAACGAAGCGTGCG-CCACTCGTGG-CGTG  
GTA--CTCGTACCAACTGCACGCTCGGGACGCTGGCGTATTGAGCTCTTCATCCGACCCGCTCTTGAAACACGGACCAAGG  
AGTCTAACATGTATGCGAGCCGGTGGGCGGCAAACCCATTGAGGCGCAAGTAACTGACA-TTT?A-AAAATTTAGAAGT  
AATGAAATTAGTTGCTGATTGTATTGAAAAAA-TA-----TTT-----AGTATCA  
-----ACTC-----GATCA-----TT  
TAATTATTGAGTAAAAATGATTATCTTGAACCTATTACTTATATAT-----AAGTAAATAAAATAAAAAAA-  
TTAAAAATTCTAACAAA-TAAATAT-----TTCTTAAA-----GTATA-TATA--GT  
ATAGAAAGATTATGAAATTAGAAAGTGATTGAAATAAAAAAA-TTCTTG-----TTTACTTAAAAAAAAGAA  
ATTAGGCAACATTTTCTTTTTTGTATTCTTTAATACGTTTTTAATCAAAATTTATTTTATTAATTAGTTTAACATCCA  
AAAGATTCTTAGGTCAATGCTTAGAAAAATAAAAAAGAATTTACTAAAAATAATCTGAGTTGCATCAAATATAAAAAATA  
ATATACAATGATAC-GTTTTGTTATAGGAAAA-TGAGTTTATCTAAAAATAAACAAAATGAAATATCAAAGAAGTTTTT  
TTATAAGATT---AAAAGAAAAAAGCTTATTTGTCGAGCAGACCTTATTCTTGCAAGAGTTATCAATTGAG-AAATTTTTT  
AAAAAAT??????AAAATATATATA?TAAATTAAAAAAAATTAATAATAA-CTTAAA---TAATTTGAGCTTTAGT  
AGAAAACTTACTAAATGCTAGTTTTTCTAGATTCTAGGGAACTTAGGTTGAAAAAATATAAGCAATCCTGAGCCAAATTT  
TATTTCTTTAAAAATAAGATAGGTGCAGAGACTCAATGGAAGCTATCCTAACGAATAATGTTTTAAGATTTTTTTT-TATTA  
AATAATTAATTAATAAAAAATAAATTTAACTAAAACCTTTATCTTTTATATATTAAGCGAGGATAAAGATAGAGTCCAATTT  
TACATGTTATTTTTAGCAACAATTTAAATTGTGGTAAAAAGAAAAATCCGTTGGCTTTATTGACCGTGAGGGTTCAAGTCC  
CTCTACCCCCA-----AAAAT-----CTAA-----CTT-----TTTTCTTGACATAAGCT  
TCTAATTTATGTTACGATAGCCGAGACGAAACAA-TAAATAAAAAATT?TAT?A

>Timmia\_bavarica\_9

AAATCGTGGTGCCTCGCACCTCGAATTGTAGTCTGGAGAAGCGTCTCTGCAACGGACCAGACCCAAGTTCAGTGGAAAG  
TGGCGTCAGAGAGGGTGAAAACCCCGTCGAGTCTGGACACTGTTGCAAAACGAGGCGCTGTCTGCGAGTCGAGCTGTTTG  
GGAATGCAGCTCTAAGTGGGTGGTAAATTCATCCAAGGCTAAATATTGGCAAGAGACCGATAGCGAACAAGTACCGCGA  
GGGAAAGATGAAAAGGACTTTGAAAAGAGAGTTAAAAAGTGCTTGAAATGCTGGGAGGGAAGCGAATGGAAGCTGCGGG  
TGTGCCCCGGTTGGATGTGGAACGGTTCAGGCTGGTCCGCCGCTCAACGCGGGGCACTGGTCAGCGTGGGCCATCGCGGC  
GGGACAAGAGCGGGATGTAGTTTCTGCCTATGCCGTTGCGGTGGCCGAGGAACGAAGCGTGCG-CCACTCGTGG-CGTG  
GCA--CTCGTGCCAACGTCATGCTCGGGACGCTGGCGTATTGAGCTCTTCATCCGACCCGCTCTTGAAACACGGACCAAGG  
AGTCTAACATGTATGCGAGCCGGTGGGCGGCAAACCCATTGAGGCGCAAGTAACTGACA-TTT?A-AAAATTTAGAAGT  
AATAAAATTAGTTGCTGATTGTATTGAAAAAA-TA-----TTT-----AGTATCA  
-----ACTC-----GATCA-----TT  
TAATTATTGAGTAAAAATGATTATCTTGAACCTATTACTTATATAT-----AAGTAAATAAAATAAAAAAA-  
TTAAAAATTCTAACAAA-TAAATAT-----TTCTTAAA-----GTATA-TATA--GT  
ATAGAAAGATTATGAAATTAGAAAGTGATTGAAATAAAAAAA-TTCTTG-----TTTACTTAAAAAAA  
ATTAGGCAACATTTTCTTTTTT-TTATTCTTTAATACGTTTTTAATCAAAATTTATTTTATTAATTAGTTTAACATCCA  
AAAGATTCTTAGGTCAATGCTTAGAAAAATAAAAAATAATTTACTAAAAATAATCTGAGTTGCATCAAATATAAAAAATA  
ATATACAATGATAC-GTTTTGTTATAGGAAAA-TCAGTTTATCTAAAAATAAACAAAATGAAATATCAAAGAAGTTTTT  
TTATAAGATT---AAAAGAAAAAGCTTATTTGTCGAGCAGACCTTATTCTTGCAAGAGTTATCAATTGAG-AAATTTTTT  
AAAAAAT??????AAAATATATATA?TAAATTAAATAAAAAATTAATAATAA-CTTAAA---TAATTTGAGCTTTAGT  
AGAAAACTTACTAAATGCTAGTTTTTCTAGATTCTAGGGAACTTAGGTTGAAAAAATATAAGCAATCCTGAGCCAAATTT  
TATTTCTTTAAAAATAAGATAGGTGCAGAGACTCAATGGAAGCTATCCTAACGAATAATGTTTTAAGATTTTTTTT-TATTA  
AATAATTAATTAATAAAAAAGAAATTTAACTAAAACCTTTATCTTTTATATATTAAGCGAGGATAAAGATAGAGTCCAATTT  
TACATGTTATTTTTAGCAACAATTTAAATTGTGGTAAAAAGAAAAATCCGTTGGCTTTATTGACCGTGAGGGTTCAAGTCC  
CTCTACCCCCA-----AAAAT-----CTAA-----CTT-----TTTTCTTGACATAAGCT  
TCTAATTTATGTTACGATAGCCGAGACGAAACAA-TAAATAAAAAATT?TAT?A

>P660\_bavarica

AAATCGTGGTGCCTCGCACCTCGAATTGTAGTCTGGAGAAGCGTCTCTGCAACGGACCAGACCCAAGTTCAGTGGAAAG  
TGGCGTCAGAGAGGGTGAAAACCCCGTCGAGTCTGGACACTGTTGCAAAACGAGGCGCTGTCTGCGAGTCGAGCTGTTTG  
GGAATGCAGCTCTAAGTGGGTGGTAAATTCATCCAAGGCTAAATATTGGCAAGAGACCGATAGCGAACAAGTACCGCGA  
GGGAAAGATGAAAAGGACTTTGAAAAGAGAGTTAAAAAGTGCTTGAAATGCTGGGAGGGAAGCGAATGGAAGCTGCGGG  
TGTGCCCCGGTTGGATGTGGAACGGTTCAGGCTGGTCCGCCGCTCAACGCGGGGCGCTGGTCAGCGTGGGCCATCGCGGC  
GGGACAAGAGCGGGATGTAGTTTCTGCCTATGCCGTTGCGGTGGCCGAGGAACGAAGCGTGCG-CCACTCGTGG-CGTG  
GTA--CTCGTACCAACTGCACGCTCGGGACGCTGGCGTATTGAGCTCTTCATCCGACCCGCTCTTGAAACACGGACCAAGG  
AGTCTAACATGTATGCGAGCCGGTGGGCGGCAAACCCATTGAGGCGCAAGTAACTGACA-TTT?A-AAAATTTAGAAGT  
AATGAAATTAGTTGCTGATTGTATTGAAAAAA-TA-----TTT-----AGTATCA  
-----ACTC-----GATCA-----TT  
TAATTATTGAGTAAAAATGATTATCTTGAACCTATTACTTATATAT-----AAGTAAATAAAATAAAAAAA-  
TTAAAAATTCTAACAAA-TAAATAT-----TTCTTAAA-----GTATA-TATA--GT

>P675\_bavarica

>Timmia norvegica 1

[illegible]

>Timmia norvegica 2

-----ACTC-----GATCA-----TT

>Timmia norvegica 3

-----ACTC-----GATCA-----TT

>Timmia norvegica 4



TTAAAAATTGTAACAAA-TAAATAT-----TTTTTATA-----GT  
ATCGAAAGATTATGAAATTATAAAATAATTTAAAAATAAAAAA---TTTCTTG-----TTTACTT-AAAAAAGAA  
ATTAGGCAATATTTTCTTTTTTGTATTCTTTAAGATATTTTTAATTAAATTTTATTTTATTATTAATTAGTTTAAACATTCA  
AAAGATTATTAGGTCAATGCTTAGAAAAATAAAAAATAATTTACTTAAAAATAATCTGAGTTGCATCAAATATAAAAAATA  
ATATACAATGATACTGTTTTGTTATAAAAAAA-TCAGTTTATCTAAAAAATAGATAAAATTAAATATCAAAGAAGTTTTT  
TTATGAAAT-----AAAAAAAACCTATTTGTCGAGCAGACCTCATCCTTGCAAGAGTTATCAATTGAG-AAAATTTTT  
AAAT?AAAAA?T??AAAATATATA?T??AAT?TTAAAAAAAATA?TA?AAA-CTTAAA---TAATTTGAGCTTTAGT  
AGAAAAACTTACTAAATGCTAGCTTTTTCAGATTCAGGGAACTTAGGTTGAAAAAGTATAAGCAATCCTGAGCCAAATTT  
TATTCTTTAAAAATAAGATAGGTGCAGAGACTCAATGGAAGCTATCCTAACGAAGAATATTTTAAGATTTTATT-AGTTA  
AGTAATTAATTAATAAAAAATAATTTAACTAAAA-----TTTTATATATTAAGCGAGGATAAAGATAGAGTCCAATTT  
TACATGTTACTTTTAGCAACAATTTAAATTGTAGTAAAAAGAAAAATCCGTTGGCTTTAGTGACCGTGAGGGTTCAAGTCC  
CTCTACCCCCA-----AAAGT-----CTAA-----TT-----TTTTCTTGACATAAGTT  
CCTAATTTATGTTACGATAGTCGAAACGAAACAA-TAAATAAAATATT??TT?A

>Timmia\_sibirica\_1\_norvegica

AAATCGTGGTGCCTCGCACCTCGAATTGTAATCTGGAGAAGTGTCTCTGCAACGGACCAGACCCAAGTTCCTGGAAG  
TGGCGTCAGAGAGGGTGAAAACCCCGTCTAGTCTGGACACTGTTGCAACACGAGGCACTGTCTGCGAGTCGAGCTGTTTG  
GGAATGCAGCTCTAAGTGGGTGGTAAATTCATCCAAGGCTAAATATTGGCAAGAGACCGATAGCGAACAAGTACCGCGA  
GGGAAAGATGAAAAGGACTTTGAAAAGAGAGTTAAAAAGTGCTTGAAATTGCTGGGAGGGAAGCGAATGGAAGCTGCGGG  
TGTGCCCCGGTTGGATGTGGAACGGCTTCGGCTGGTCCGCCGCTCAACGCGGGGCACTGGTCAGCGTGGGCCATCGCGGC  
GGGACAAGAGCGGGATGTAGTTTCTGCTATGCCGTTGTGGTGGCCGAGGAACGAAGCGTGCG-CCACTTGTGG-CGTG  
GCA--TCCGTGCCAACTGCACGCTCGGGACGCTGGCGTATTGAGCTCTTCATCCGACCCGCTCTTGAAACACGGACCAAGG  
AGTCTAACATGTATGCGAGCCGGTGGGCGGCAAACCCATTGAGGCGCAAGTAACTGACA-TTT?A-AAAATTTGGAAGT  
AATAAAATTAGTTGCTGATTGTATTGAAAAAACA-----TTT-----AGTATCA  
-----ACTC-----GATCA-----TT  
TAATTATTGAGTAAATTTATTATCTTGAATTTATTACTTATATATACATAC-----AAGTAGATAAAATAAAAAA-  
TTAAAAATTGTAACAAA-TAAATAT-----TTTTTATA-----GT  
ATCGAAAGATTATGAAATTATAAAATAATTTAAAAATAAAAAA---TTTCTTG-----TTTACTT-AAAAAAGAA  
ATTAGGCAATATTTTATTTTTTGTATTCTTTAAGATATTTTTAATTAAATTTTATTTTATTATTAATTAGTTTAAACATTCA  
AAAGATTATTAGGTCAATGCTTAGAAAAATAAAAAATAATTTACTTAAAAATAATCTGAGTTGCATCAAATATAAAAAATA  
ATATACAATGATACTGTTTTGTTATAAAAAAA-TCAGTTTATCTAAAAAATAGATAAAATTAAATATCAAAGAAGTTTTT  
TTATGAAAT-----AAAAAAAACCTATTTGTCGAGCAGACCTCATCCTTGCAAGAGTTATCAATTGAG-AAAATTTTT  
AAAAAATAA?T??AAAATATATA?T??AAT?TTAAAAAAAATA?T??AA-NNNNNN--NNNNNNNNNNNNNNNN  
NNNNNNNNNNNNNNNNNNNNCTTTTCAGATTCAGGGAACTTAGGTTGAAAAAGTATAAGCAATCCTGAGCCAAATTT  
TATTCTTTAAAAATAAGATAGGTGCAGAGACTCAATGGAAGCTATCCTAACGAAGAATATTTTAAGATTTTATT-AGTTA  
AGTAATTAATTAATAAAAAATAATTTAACTAAAA-----TTTTATATATTAAGCGAGGATAAAGATAGAGTCCAATTT  
TACATGTTACTTTTAGCAACAATTTAAATTGTAGTAAAAAGAAAAATCCGTTGGCTTTAGTGCCGTGAGGGTTCAAGTCC  
CTCTACCCCCA-----AAAGT-----CTAA-----TT-----TTTTCTTGACATAAGTT  
CCTAATTTATGTTACGATAGTCGAAACGAAACAA-TAAATAAAATATT??TT?A

>P64\_norvegica

AAATCGTGGTGCCTCGCACCTCGAGTTGTAGTCTGGAGAAGTGTCTCTGCAACGGACCAGACCCAAGTTCCTGGAAG  
TGGCGTCAGAGAGGGTGAAAACCCCGTTCGAGTCTGGACACTGTTGCAACACGAGGCACTGTCTGCGAGTCGAGCTGTTTG  
GGAATGCAGCTCTAAGTGGGTGGTAAATTCATCCAAGGCTAAATATTGGCAAGAGACCGATAGCGAACAAGTACCGCGA  
GGGAAAGATGAAAAGGACTTTGAAAAGAGAGTTAAAAAGTGCTTGAAATTGCTGGGAGGGAAGCGAATGGAAGCTGCGGG  
TGTGCCCCGGTTGGATGTGGAACGGCTTCGGCTGGTCCGCCGCTCAACGCGGGGCGCTGGTCAGCGTGGGCCATCGCGGC  
GGGACAAGAGCGGGATGTAGTTTCTGCTATGCCGTTGTGGTGGCCGAGGAACGAAGCGTGCG-CCACTTGTGG-CGTG  
GCA--TCCGTGCCAACTGCACGCTCGGGACGCTGGCGTATTGAGCTCTTCATCCGACCCGCTCTTGAAACACGGACCAAGG  
AGTCTAACATGTATGCGAGCCGGTGGGCGGCAAACCCATTGAGGCGCAAGTAACTGACA-TTT?A-AAAATTTGGAAGT  
AATAAAATTAGTTGCTGATTGTATTGAAAAAACA-----TTT-----AGTATCA  
-----ACTC-----GATCA-----TT  
TAATTATTGAGTAAATTTATTATCTTGAATTTATTACTTATATATACATAC-----AAGTAGATAAAATAAAAAA-  
TTAAAAATTGTAACAAA-TAAATAT-----TTTTTATA-----GT  
ATCGAAAGATTATGAAATTATAAAATAATTTAAAAATAAAAAA---TTTCTTG-----TTTACTT-AAAAAAGAA  
ATTAGGCAATATTTTCTTTTTTGTATTCTTTAAGATATTTTTAATTAAATTTTATTTTATTATTAATTAGTTTAAACATTCA  
AAAGATTATTAGGTCAATGCTTAGAAAAATAAAAAATAATTTACTTAAAAATAATCTGAGTTGCATCAAATATAAAAAATA  
ATATACAATGATACTGTTTTGTTATAAAAAAA-TCAGTTTATCTAAAAAATAGATAAAATTAAATATCAAAGAAGTTTTT  
TTATGAAAT-----AAAAAAAACCTATTTGTCGAGCAGACCTCATCCTTGCAAGAGTTATCAATTGAG-AAAATTTTT  
AAAAAATAA?T??AAAATATATA?T??AAT?TTAAAAAAAATA?TA?AAA-CTTAAA---TAATTTGAGCTTTAGT  
AGAAAAACTTACTAAATGCTAGCTTTTTCAGATTCAGGGAACTTAGGTTGAAAAAGTATAAGCAATCCTGAGCCAAATTT

TATTCTTTAAAAATAAGATAGGTGCAGAGACTCAATGGAAGCTATCCTAACGAAGAATATTTTAAGATTTTATT-AGTTA  
AGTAATTAATTAATAAAAAATAAATTTAACTAAAA-----TTTTATATATTAAGCGAGGATAAAGATAGAGTCCAATTT  
TACATGTTACTTTTAGCAACAATTTAAATTGTAGTAAAAAGAAAATCCGTTGGCTTTAGTGACCGTGAGGGTTCAAGTCC  
CTCTACCCCCA-----AAAGT-----CTAA-----TT-----TTTTCTTGACATAAGTT  
CCTAATTTATGTTACGATAGTCGAAACGAAACAA-TAAATAAAATATT??TT?A

>P65\_norvegica

AAATCGTGGTGCCTCGCACCTCGAGTTGTAGTCTGGAGAAGTGTCTCTGCAACGGACCAGACCCAAGTTCACCTGGAAG  
TGGCGTCAGAGAGGGTGAAAACCCCGTCGAGTCTGGACACTGTTGCAACACGAGGCACTGTCTGCGAGTCGAGCTGTTTG  
GGAATGCAGCTCTAAGTGGGTGGTAAATTCCATCCAAGGCTAAATATTGGCAAGAGACCGATAGCGAACAAGTACCGCGA  
GGGAAAGATGAAAAGGACTTTGAAAAGAGAGTTAAAAAGTGCTTGAAATTGCTGGGAGGGAAGCGAATGGAAGCTGCGGG  
TGTGCCCCGGTTGGATGTGGAACGGCTTCGGCTGGTCCGCCGCTCAACGCGGGGCACTGGTCAGCGTGGGCCATCGCGGC  
GGGACAAGAGCGGGATGTAGTTTCTGCCTATGCCGTTGTGGTGGCCGAGGAACGAAGCGTGCG-CCACTTGTGG-CGTG  
GCA--TCCGTGCCAACTGCACGCTCGGGACGCTGGCGTATTGAGCTCTTCATCCGACCCGCTCTTGAAACACGGACCAAGG  
AGTCTAACATGTATGCGAGCCGGTGGGCGGCAAACCCATTGAGGCGCAAGTAACTGACA-TTT?A-AAAATTTGGAAGT  
AATAAAATTAGTTGCTGATTGTATTGAAAAAACA-----TTT-----AGTATCA  
-----ACTC-----GATCA-----TT  
TAATTATTGAGTAAAAATTATTATCTTGAATTTATTACTTATATATACATAC-----AAGTAGATAAAATAAAAAA-  
TTAAAAATTGTAACAAA-TAAATAT-----TTTTATA-----GT  
ATCGAAAGATTATGAAATTATAAAATAATTAATAAAAAA---TTTCTTG-----TTTACTT-AAAAAAGAA  
ATTAGGCAATATTTTCTTTTTTGTATTCTTTAAGATATTTTAAATTTTATTTTATTAATTAGTTTAACATTCA  
AAAGATTATTAGGTCAATGCTTAGAAAAATAAAAAATAATTTACTTAAAAATAATCTGAGTTGCATCAAATATAAAAAATA  
ATATACAATGATACTGTTTTGTTATAAAAAA-TCAGTTTATCTAAAAATAGATAAAATTAATATCAAAGAAGTTTTT  
TTATGAAAT-----AAAAAAAACCTATTTGTCGAGCAGACCTCATCCTTGCAAGAGTTATCAATTGAG-AAAATTTTT  
AAAAAATAA?T??TAAATATATA?T??TAAATTTAAAAAATA?TA?AAA-CTTAAA---TAATTTGAGCTTTAGT  
AGAAAACTTACTAAATGCTAGCTTTCAGATTCAGGGAACTTAGGTTGAAAAAGTATAAGCAATCCTGAGCCAAATTT  
TATTCTTTAAAAATAAGATAGGTGCAGAGACTCAATGGAAGCTATCCTAACGAAGAATATTTTAAGATTTTATT-AGTTA  
AGTAATTAATTAATAAAAAATAAATTTAACTAAAA-----TTTTATATATTAAGCGAGGATAAAGATAGAGTCCAATTT  
TACATGTTACTTTTAGCAACAATTTAAATTGTAGTAAAAAGAAAATCCGTTGGCTTTAGTGACCGTGAGGGTTCAAGTCC  
CTCTACCCCCA-----AAAGT-----CTAA-----TT-----TTTTCTTGACATAAGTT  
CCTAATTTATGTTACGATAGTCGAAACGAAACAA-TAAATAAAATATT??TT?A

>P71\_norvegica

AAATCGTGGTGCCTCGCACCTCGAGTTGTAGTCTGGAGAAGTGTCTCTGCAACGGACCAGACCCAAGTTCACCTGGAAG  
TGGCGTCAGAGAGGGTGAAAACCCCGTCGAGTCTGGACACTGTTGCAACACGAGGCACTGTCTGCGAGTCGAGCTGTTTG  
GGAATGCAGCTCTAAGTGGGTGGTAAATTCCATCCAAGGCTAAATATTGGCAAGAGACCGATAGCGAACAAGTACCGCGA  
GGGAAAGATGAAAAGGACTTTGAAAAGAGAGTTAAAAAGTGCTTGAAATTGCTGGGAGGGAAGCGAATGGAAGCTGCGGG  
TGTGCCCCGGTTGGATGTGGAACGGCTTCGGCTGGTCCGCCGCTCAACGCGGGGCNCTGGTCAGCGTGGGCCATCGCGGC  
GGGACAAGAGCGGGATGTAGTTTCTGCCTATGCCGTTGTGGTGGCCGAGGAACGAAGCGTGCG-CCACTTGTGG-CGTG  
GCA--TCCGTGCCAACTGCACGCTCGGGACGCTGGCGTATTGAGCTCTTCATCCGACCCGCTCTTGAAACACGGACCAAGG  
AGTCTAACATGTATGCGAGCCGGTGGGCGGCAAACCCATTGAGGCGCAAGTAACTGACA-TTT?A-AAAATTTGGAAGT  
AATAAAATTAGTTGCTGATTGTATTGAAAAAACA-----TTT-----AGTATCA  
-----ACTC-----GATCA-----TT  
TAATTATTGAGTAAAAATTATTATCTTGAATTTATTACTTATATATACATAC-----AAGTAGATAAAATAAAAAA-  
TTAAAAATTGTAACAAA-TAAATAT-----TTTTATA-----GT  
ATCGAAAGATTATGAAATTATAAAATAATTAATAAAAAA---TTTCTTG-----TTTACTT-AAAAAAGAA  
ATTAGGCAATATTTTCTTTTTTGTATTCTTTAAGATATTTTAAATTTTATTTTATTAATTAGTTTAACATTCA  
AAAGATTATTAGGTCAATGCTTAGAAAAATAAAAAATAATTTACTTAAAAATAATCTGAGTTGCATCAAATATAAAAAATA  
ATATACAATGATACTGTTTTGTTATAAAAAA-TCAGTTTATCTAAAAATAGATAAAATTAATATCAAAGAAGTTTTT  
TTATGAAAT-----AAAAAAAACCTATTTGTCGAGCAGACCTCATCCTTGCAAGAGTTATCAATTGAG-AAAATTTTT  
AAAAAATAA?T??TAAATATATA?T??TAAATTTAAAAAATA?TA?AAA-CTTAAA---TAATTTGAGCTTTAGT  
AGAAAACTTACTAAATGCTAGCTTTCAGATTCAGGGAACTTAGGTTGAAAAAGTATAAGCAATCCTGAGCCAAATTT  
TATTCTTTAAAAATAAGATAGGTGCAGAGACTCAATGGAAGCTATCCTAACGAAGAATATTTTAAGATTTTATT-AGTTA  
AGTAATTAATTAATAAAAAATAAATTTAACTAAAA-----TTTTATATTAAGCGAGGATAAAGATAGAGTCCAATTT  
TACATGTTACTTTTAGCAACAATTTAAATTGTAGTAAAAAGAAAATCCGTTGGCTTTAGTGACCGTGAGGGTTCAAGTCC  
CTCTACCCCCA-----AAAGT-----CTAA-----TT-----TTTTCTTGACATAAGTT  
CCTAATTTATGTTACGATAGTCGAAACGAAACAA-TAAATAAAATATT??TT?A

>P72\_norvegica

AAATCGTGGTGCCTCGCACCTCGAGTTGTAGTCTGGAGAAGTGTCTCTGCAACGGACCAGACCCAAGTTCACCTGGAAG  
TGGCGTCAGAGAGGGTGAAAACCCCGTCGAGTCTGGACACTGTTGCAACACGAGGCACTGTCTGCGAGTCGAGCTGTTTG



GGAATGCAGCTCTAAGTGGGTGGTAAATTCCATCCAAGGCTAAATATTGGCAAGAGACCGATAGCGAACAAGTACCGCGA  
GGGAAAGATGAAAAGGACTTTGAAAAGAGAGTTAAAAAGTGCTTGAAATTGCTGGGAGGGAAGCGAATGGAAGCTGCGGG  
TGTGCCCCGGTTGGATGTGGAACGGCTTCGGCTGGTCCGCCGCTCAACGCGGGGCACTGGTCAGCGTGGGCCATCGCGGC  
GGGACAAGAGCGGGATGTAGTTTCTGCCTATGCCGTTGTGGTGGCCGAGGAACGAAGCGTGCG-CCACTTGTGG-CGTG  
GCA--TCCGTGCCAACTGCACGCTCGGGACGCTGGCGTATTGAGCTCTTCATCCGACCCGTCTTGAAACACGGACCAAGG  
AGTCTAACATGTATGCGAGCCGGTGGGCGGCAAACCCATTGAGGCGCAAGTAACTGACA-TTT?A-AAAATTTGGAAGT  
AATAAAATTAGTTGCTGATTGTATTGAAAAAACA-----TTT-----AGTATCA  
-----ACTC-----GATCA-----TT  
TAATTATTGAGTAAAAATTATTATCTTGAATTTATTACTTATATATACATAC-----AAGTAGATAAAAATAAAAAA-  
TTAAAAATTGTAACAAA-TAAATAT-----TTTTTATA-----GT  
ATCGAAAGATTATGAAATTATAAAATAATTAATAAAAAA---TTTCTTG-----TTTACTT-AAAAAAGAA  
ATTAGGCAATATTTTCTTTTTTGTATTCTTTAAGATATTTTTAATTAAATTTTATTTTATTAATTAGTTTAACATTCA  
AAAGATTATTAGGTCAATGCTTAGAAAAATAAAAAATAATTTACTTAAAAATAATCTGAGTTGCATCAAATATAAAAAATA  
ATATACAATGATACTGTTTTGTTATAAAAAA-TCAGTTTATCTAAAAATAGATAAAATTAATATCAAAGAAGTTTTT  
TTATGAAAT-----AAAAAAAACCTATTTGTGCGAGCAGACCTCATCCTTGCAAGAGTTATCAATTGAG-AAAATTTTT  
AAAAAATAA?T??TAAAATATATA?T??TAA?TTAAAAAATA?TA?AAA-CTTAAA---TAATTTGAGCTTTAGT  
AGAAAACTTACTAAATGCTAGCTTTTTCAGATTCAGGGAACTTAGGTTGAAAAAGTATAAGCAATCCTGAGCCAAATTT  
TATTCCTTTAAAAATAAGATAGGTGCAGAGACTCAATGGAAGCTATCCTAACGAAGAATATTTTAAGATTTTATT-AGTTA  
AGTAATTAATTAATAAAAAATAATTTAACTAAAA-----TTTTATATATTAAGCGAGGATAAAGATAGAGTCCAATTT  
TACATGTTACTTTTAGCAACAATTTAAATTGTAGTAAAAAGAAAATCCGTTGGCTTTAGTGACCGTGAGGGTTCAAGTCC  
CTCTACCCCA-----AAAGT-----CTAA-----TT-----TTTTCTTGACATAAGTT  
CCTAATTTATGTTACGATAGTCGAAACGAAACAA-TAAATAAAATATT??TT?A

>P73\_norvegica

AAATCGTGGTGCCTCGCACCTCGAGTTGTAGTCTGGAGAAGTGTCTCTGCAACGGACCAGACCCAAGTTCAGTGGAAAG  
TGGCGTCAGAGAGGGTGAAAACCCCGTCGAGTCTGGACACTGTTGCAACACGAGGCACTGTCTGCGAGTCGAGCTGTTTG  
GGAATGCAGCTCTAAGTGGGTGGTAAATTCCATCCAAGGCTAAATATTGGCAAGAGACCGATAGCGAACAAGTACCGCGA  
GGGAAAGATGAAAAGGACTTTGAAAAGAGAGTTAAAAAGTGCTTGAAATTGCTGGGAGGGAAGCGAATGGAAGCTGCGGG  
TGTGCCCCGGTTGGATGTGGAACGGCTTCGGCTGGTCCGCCGCTCAACGCGGGGCACTGGTCAGCGTGGGCCATCGCGGC  
GGGACAAGAGCGGGATGTAGTTTCTGCCTATGCCGTTGTGGTGGCCGAGGAACGAAGCGTGCG-CCACTTGTGG-CGTG  
GCA--TCCGTGCCAACTGCACGCTCGGGACGCTGGCGTATTGAGCTCTTCATCCGACCCGTCTTGAAACACGGACCAAGG  
AGTCTAACATGTATGCGAGCCGGTGGGCGGCAAACCCATTGAGGCGCAAGTAACTGACA-TTT?A-AAAATTTGGAAGT  
AATAAAATTAGTTGCTGATTGTATTGAAAAAACA-----TTT-----AGTATCA  
-----ACTC-----GATCA-----TT  
TAATTATTGAGTAAAAATTATTATCTTGAATTTATTACTTATATATACATAC-----AAGTAGATAAAAATAAAAAA-  
TTAAAAATTGTAACAAA-TAAATAT-----TTTTTATA-----GT  
ATCGAAAGATTATGAAATTATAAAATAATTAATAAAAAA---TTTCTTG-----TTTACTT-AAAAAAGAA  
ATTAGGCAATATTTTCTTTTTTGTATTCTTTAAGATATTTTTAATTAAATTTTATTTTATTAATTAGTTTAACATTCA  
AAAGATTATTAGGTCAATGCTTAGAAAAATAAAAAATAATTTACTTAAAAATAATCTGAGTTGCATCAAATATAAAAAATA  
ATATACAATGATACTGTTTTGTTATAAAAAA-TCAGTTTATCTAAAAATAGATAAAATTAATATCAAAGAAGTTTTT  
TTATGAAAT-----AAAAAAAACCTATTTGTGCGAGCAGACCTCATCCTTGCAAGAGTTATCAATTGAG-AAAATTTTT  
AAAAAATAA?T??TAAAATATATA?T??TAA?TTAAAAAATA?TA?AAA-CTTAAA---TAATTTGAGCTTTAGT  
AGAAAACTTACTAAATGCTAGCTTTTTCAGATTCAGGGAACTTAGGTTGAAAAAGTATAAGCAATCCTGAGCCAAATTT  
TATTCCTTTAAAAATAAGATAGGTGCAGAGACTCAATGGAAGCTATCCTAACGAAGAATATTTTAAGATTTTATT-AGTTA  
AGTAATTAATTAATAAAAAATAATTTAACTAAAA-----TTTTATATATTAAGCGAGGATAAAGATAGAGTCCAATTT  
TACATGTTACTTTTAGCAACAATTTAAATTGTAGTAAAAAGAAAATCCGTTGGCTTTAGTGACCGTGAGGGTTCAAGTCC  
CTCTACCCCA-----AAAGT-----CTAA-----TT-----TTTTCTTGACATAAGTT  
CCTAATTTATGTTACGATAGTCGAAACGAAACAA-TAAATAAAATATT??TT?A

>P77\_norvegica

AAATCGTGGTGCCTCGCACCTCGAGTTGTAGTCTGGAGAAGTGTCTCTGCAACGGACCAGACCCAAGTTCAGTGGAAAG  
TGGCGTCAGAGAGGGTGAAAACCCCGTCGAGTCTGGACACTGTTGCAACACGAGGCACTGTCTGCGAGTCGAGCTGTTTG  
GGAATGCAGCTCTAAGTGGGTGGTAAATTCCATCCAAGGCTAAATATTGGCAAGAGACCGATAGCGAACAAGTACCGCGA  
GGGAAAGATGAAAAGGACTTTGAAAAGAGAGTTAAAAAGTGCTTGAAATTGCTGGGAGGGAAGCGAATGGAAGCTGCGGG  
TGTGCCCCGGTTGGATGTGGAACGGCTTCGGCTGGTCCGCCGCTCAACGCGGGGCACTGGTCAGCGTGGGCCATCGCGGC  
GGGACAAGAGCGGGATGTAGTTTCTGCCTATGCCGTTGTGGTGGCCGAGGAACGAAGCGTGCG-CCACTTGTGG-CGTG  
GCA--TCCGTGCCAACTGCACGCTCGGGACGCTGGCGTATTGAGCTCTTCATCCGACCCGTCTTGAAACACGGACCAAGG  
AGTCTAACATGTATGCGAGCCGGTGGGCGGCAAACCCATTGAGGCGCAAGTAACTGACA-TTT?A-AAAATTTGGAAGT  
AATAAAATTAGTTGCTGATTGTATTGAAAAAACA-----TTT-----AGTATCA  
-----ACTC-----GATCA-----TT

TAATTATTGAGTAAAAATTATTATCTTGAATTTATTACTTATATATACATAC-----AAGTAGATAAAAATAAAAAAA-  
TTAAAAATTGTAACAAA-TAAATAT-----TTTTTATA-----GT  
ATCGAAAGATTATGAAATTATAAAATAATTTAAATAAAAAA---TTTCTTG-----TTTACTT-AAAAAAGAA  
ATTAGGCAATATTTTCTTTTTTGTATTCTTTAAGATATTTTTAATTAAATTTTATTTTATTAATTAGTTTAAACATTCA  
AAAGATTATTAGGTCAATGCTTAGAAAAATAAAAAATAATTTACTTAAAAATAATCTGAGTTGCATCAAATATAAAAAATA  
ATATACAATGATACTGTTTTGTTATAAAAAAA-TCAGTTTATCTAAAAAATAGATAAAATTAATATCAAAGAAGTTTTT  
TTATGAAAT-----AAAAAAAACCTATTTGTCGAGCAGACCTCATCCTTGCAAGAGTTATCAATTGAG-AAAATTTTT  
AAAAAATAA?T??AAAATATATA?T??AAT?TTAAAAAAAATA?TA?AAA-CTTAAA---TAATTTGAGCTTTAGT  
AGAAAACTTACTAAATGCTAGCTTTTTCAGATTCAGGGAACTTAGGTTGAAAAAGTATAAGCAATCCTGAGCCAAATTT  
TATTCCTTTAAAAATAAGATAGGTGCAGAGACTCAATGGAAGCTATCCTAACGAAGAATATTTTAAGATTTTATT-AGTTA  
AGTAATTAATTAATAAAAAATAATTTAACTAAAA-----TTTTATATATTAAGCGAGGATAAAGATAGAGTCCAATTT  
TACATGTTACTTTTTAGCAACAATTTAAATTGTAGTAAAAAGAAAAATCCGTTGGCTTTAGTGACCGTGAGGGTTCAAGTCC  
CTCTACCCCCA-----AAAGT-----CTAA-----TT-----TTTTCTTGACATAAGTT  
CCTAATTTATGTTACGATAGTCGAAACGAAACAA-TAAATAAAATATT?TT?A

>P78\_norvegica

AAATCGTGGTGCCTCGCGCCTCGAATTGTAGTCTGGAGAAGTGTCTCTGCAACGGACCAGACCCAAGTTCACTGGAAAG  
TGGCGTCAGAGAGGGTGAAAACCCCGTCGAGTCTGGACACTGTTGCAACACGAGGCACTGTCTGCGAGTCGAGCTGTTTG  
GGAATGCAGCTCTAAGTGGGTGGTAAATTCATCCAAGGCTAAATATTGGCAAGAGACCGATAGCGAACAAGTACCGCGA  
GGGAAAGATGAAAAGGACTTTGAAAAGAGAGTTAAAAAGTGCTTGAAATTGCTGGGAGGGAAGCGAATGGAAGCTGCGGG  
TGTGCCCGCGTTGGATGTGGAACGGCTTCGGCTGGTCCGCCGCTCAACGCGGGGCACTGGTCAGCGTGGGCCATCGCGGC  
GGGACAAGAGCGGGATGTAGTTTCTGCTATGCCGTTGTGGTGGCCGAGGAACGAAGCGTGCG-CCACTTGTGG-CGTG  
GCA--TCCGTGCCAACTGCACGCTCGGGACGCTGGCGTATTGAGCTCTTCATCCGACCCGCTCTTGAAACACGGACCAAGG  
AGTCTAACATGTATGCGAGCCGGTGGGCGGCAAACCCATTGAGGCGCAAGTAACTGACA-TTT?A-AAAATTTGGAAGT  
AATAAAATTAGTTGCTGATTGTATTGAAAAAACA-----TTT-----AGTATCA  
-----ACTC-----GATCA-----TT  
TAATTATTGAGTAAAAATTATTATCTTGAATTTATTACTTATATATACATAC-----AAGTAGATAAAAATAAAAAAA-  
TTAAAAATTGTAACAAA-TAAATAT-----TTTTTATA-----GT  
ATCGAAAGATTATGAAATTATAAAATAATTTAAATAAAAAA---TTTCTTG-----TTTACTT-AAAAAAGAA  
ATTAGGCAATATTTTATTTTTTGTATTCTTTAAGATATTTTTAATTAAATTTTATTTTATTAATTAGTTTAAACATTCA  
AAAGATTATTAGGTCAATGCTTAGAAAAATAAAAAATAATTTACTTAAAAATAATCTGAGTTGCATCAAATATAAAAAATA  
ATATACAATGATACTGTTTTGTTATAAAAAAA-TCAGTTTATCTAAAAAATAGATAAAATTAATATCAAAGAAGTTTTT  
TTATGAAAT-----AAAAAAAACCTATTTGTCGAGCAGACCTCATCCTTGCAAGAGTTATCAATTGAG-AAAATTTTT  
AAAAAATAA?T??AAAATATATA?T??AAT?TTAAAAAAAATATAA?AAA-CTTAAA---TAATTTGAGCTTTAGT  
AGAAAACTTACTAAATGCTAGCTTTTTCAGATTCAGGGAACTTAGGTTGAAAAAGTATAAGCAATCCTGAGCCAAATTT  
TATTCCTTTAAAAATAAGATAGGTGCAGAGACTCAATGGAAGCTATCCTAACGAAGAATATTTTAAGATTTTATT-AGTTA  
AGTAATTAATTAATAAAAAATAATTTAACTAAAA-----TTTTATATATTAAGCGAGGATAAAGATAGAGTCCAATTT  
TACATGTTACTTTTTAGCAACAATTTAAATTGTAGTAAAAAGAAAAATCCGTTGGCTTTAGTGACCGTGAGGGTTCAAGTCC  
CTCTACCCCCA-----AAAGT-----CTAA-----TT-----TTTTCTTGACATAAGTT  
CCTAATTTATGTTACGATAGTCGAAACGAAACAA-TAAATAAAATATT?TT?A

>P83\_norvegica

AAATCGTGGTGCCTCGCACCTCGAGTTGTAGTCTGGAGAAGTGTCTCTGCAACGGACCAGACCCAAGTTCACTGGAAAG  
TGGCGTCAGAGAGGGTGAAAACCCCGTCGAGTCTGGACACTGTTGCAACACGAGGCACTGTCTGCGAGTCGAGCTGTTTG  
GGAATGCAGCTCTAAGTGGGTGGTAAATTCATCCAAGGCTAAATATTGGCAAGAGACCGATAGCGAACAAGTACCGCGA  
GGGAAAGATGAAAAGGACTTTGAAAAGAGAGTTAAAAAGTGCTTGAAATTGCTGGGAGGGAAGCGAATGGAAGCTGCGGG  
TGTGCCCGCGTTGGATGTGGAACGGCTTCGGCTGGTCCGCCGCTCAACGCGGGGCACTGGTCAGCGTGGGCCATCGCGGC  
GGGACAAGAGCGGGATGTAGTTTCTGCTATGCCGTTGTGGTGGCCGAGGAACGAAGCGTGCG-CCACTTGTGG-CGTG  
GCA--TCCGTGCCAACTGCACGCTCGGGACGCTGGCGTATTGAGCTCTTCATCCGACCCGCTCTTGAAACACGGACCAAGG  
AGTCTAACATGTATGCGAGCCGGTGGGCGGCAAACCCATTGAGGCGCAAGTAACTGACA-TTT?A-AAAATTTGGAAGT  
AATAAAATTAGTTGCTGATTGTATTGAAAAAACA-----TTT-----AGTATCA  
-----ACTC-----GATCA-----TT  
TAATTATTGAGTAAAAATTATTATCTTGAATTTATTACTTATATATACATAC-----AAGTAGATAAAAATAAAAAAA-  
TTAAAAATTGTAACAAA-TAAATAT-----TTTTTATA-----GT  
ATCGAAAGATTATGAAATTATAAAATAATTTAAATAAAAAA---TTTCTTG-----TTTACTT-AAAAAAGAA  
ATTAGGCAATATTTTCTTTTTTGTATTCTTTAAGATATTTTTAATTAAATTTTATTTTATTAATTAGTTTAAACATTCA  
AAAGATTATTAGGTCAATGCTTAGAAAAATAAAAAATAATTTACTTAAAAATAATCTGAGTTGCATCAAATATAAAAAATA  
ATATACAATGATACTGTTTTGTTATAAAAAAA-TCAGTTTATCTAAAAAATAGATAAAATTAATATCAAAGAAGTTTTT  
TTATGAAAT-----AAAAAAAACCTATTTGTCGAGCAGACCTCATCCTTGCAAGAGTTATCAATTGAG-AAAATTTTT  
AAAAAATAA?T??AAAATATATA?T??AAT?TTAAAAAAAATA?TA?AAA-CTTAAA---TAATTTGAGCTTTAGT

AGAAAACTTACTAAATGCTAGCTTTCAGATTCAGGGAACTTAGGTTGAAAAAGTATAAGCAATCCTGAGCCAAATTT  
TATTCCTTTAAAAATAAGATAGGTGCAGAGACTCAATGGAAGCTATCCTAACGAAGAATATTTTAAGATTTTATT-AGTTA  
AGTAATTAATTAATAAAAAATAAATTTAACTAAAA-----TTTTATATATTAAGCGAGGATAAAGATAGAGTCCAATTT  
TACATGTTACTTTTAGCAACAATTTAAATTGTAGTAAAAAGAAAATCCGTTGGCTTTAGTGACCGTGAGGGTTCAAGTCC  
CTCTACCCCCA-----AAAGT-----CTAA-----TT-----TTTTCTTGACATAAGTT  
CCTAATTTATGTTACGATAGTCGAAACGAAACAA-TAAATAAAATATT??TT?A

>P84\_norvegica

AAATCGTGGTGCCTCGCACCTCGAGTTGTAGTCTGGAGAAGTGTCTCTGCAACGGACCAGACCCAAGTTCCTGGAAG  
TGGCGTCAGAGAGGGTGAAAACCCCGTCGAGTCTGGACACTGTTGCAACACGAGGCACTGTCTGCGAGTCGAGCTGTTT  
GGAATGCAGCTCTAAGTGGGTGGTAAATTCATCCAAGGCTAAATATTGGCAAGAGACCGATAGCGAACAAGTACCGCGA  
GGGAAAGATGAAAAGGACTTTGAAAAGAGAGTTAAAAAGTGCTTGAAATTGCTGGGAGGGAAGCGAATGGAAGCTGCGGG  
TGTGCCCCGGTTGGATGTGGAACGGCTTCGGCTGGTCCGCCGCTCAACGCGGGGCACTGGTCAGCGTGGGCCATCGCGGC  
GGGACAAGAGCGGGATGTAGTTTCTGCCTATGCCGTTGTGGTGGCCGAGGAACGAAGCGTGCG-CCACTTGTGG-CGTG  
GCA--TCCGTGCCAACTGCACGCTCGGGACGCTGGCGTATTGAGCTCTTCATCCGACCCGCTCTTGAAACACGGACCAAGG  
AGTCTAACATGTATGCGAGCCGGTGGGCGGCAAACCCATTGAGGCGCAAGTAACTGACA-TTT?A-AAAATTTGGAAGT  
AATAAAATTAGTTGCTGATTGTATTGAAAAAACA-----TTT-----AGTATCA  
-----ACTC-----GATCA-----TT  
TAATTATTGAGTAAAAATTATTATCTTGAATTTATTACTTATATATACATAC-----AAGTAGATAAAATAAAAAA-  
TTAAAAATTGTAACAAA-TAAATAT-----TTTTATA-----GT  
ATCGAAAGATTATGAAATTATAAAATAATTAATAAAAAA---TTTCTTG-----TTACTT-AAAAAAGAA  
ATTAGGCAATATTTCTTTTTTGTATTCTTTAAGATATTTTAAATTTTATTTTATTAATTAGTTTAAACATTCA  
AAAGATTATTAGGTCAATGCTTAGAAAAATAAAAAATAATTTACTTAAAAATAATCTGAGTTGCATCAAATATAAAAAATA  
ATATACAATGATACTGTTTTGTTATAAAAAA-TCAGTTTATCTAAAAATAGATAAAATTAATATCAAAGAAGTTTTT  
TTATGAAAT-----AAAAAAACTTATTTGTCGAGCAGACCTCATCCTTGCAAGAGTTATCAATTGAG-AAAATTTTT  
AAAAAATAA?T???AAAATATATA?T???AAT?TTAAAAAATA?TA?AAA-CTTAAA---TAATTTGAGCTTTAGT  
AGAAAACTTACTAAATGCTAGCTTTCAGATTCAGGGAACTTAGGTTGAAAAAGTATAAGCAATCCTGAGCCAAATTT  
TATTCCTTTAAAAATAAGATAGGTGCAGAGACTCAATGGAAGCTATCCTAACGAAGAATATTTTAAGATTTTATT-AGTTA  
AGTAATTAATTAATAAAAAATAAATTTAACTAAAA-----TTTTATATATTAAGCGAGGATAAAGATAGAGTCCAATTT  
TACATGTTACTTTTAGCAACAATTTAAATTGTAGTAAAAAGAAAATCCGTTGGCTTTAGTGACCGTGAGGGTTCAAGTCC  
CTCTACCCCCA-----AAAGT-----CTAA-----TT-----TTTTCTTGACATAAGTT  
CCTAATTTATGTTACGATAGTCGAAACGAAACAA-TAAATAAAATATT??TT?A

>P85\_norvegica

AAATCGTGGTGCCTCGCACCTCGAGTTGTAGTCTGGAGAAGTGTCTCTGCAACGGACCAGACCCAAGTTCCTGGAAG  
TGGCGTCAGAGAGGGTGAAAACCCCGTCGAGTCTGGACACTGTTGCAACACGAGGCACTGTCTGCGAGTCGAGCTGTTT  
GGAATGCAGCTCTAAGTGGGTGGTAAATTCATCCAAGGCTAAATATTGGCAAGAGACCGATAGCGAACAAGTACCGCGA  
GGGAAAGATGAAAAGGACTTTGAAAAGAGAGTTAAAAAGTGCTTGAAATTGCTGGGAGGGAAGCGAATGGAAGCTGCGGG  
TGTGCCCCGGTTGGATGTGGAACGGCTTCGGCTGGTCCGCCGCTCAACGCGGGGCACTGGTCAGCGTGGGCCATCGCGGC  
GGGACAAGAGCGGGATGTAGTTTCTGCCTATGCCGTTGTGGTGGCCGAGGAACGAAGCGTGCG-CCACTTGTGG-CGTG  
GCA--TCCGTGCCAACTGCACGCTCGGGACGCTGGCGTATTGAGCTCTTCATCCGACCCGCTCTTGAAACACGGACCAAGG  
AGTCTAACATGTATGCGAGCCGGTGGGCGGCAAACCCATTGAGGCGCAAGTAACTGACA-TTT?A-AAAATTTGGAAGT  
AATAAAATTAGTTGCTGATTGTATTGAAAAAACA-----TTT-----AGTATCA  
-----ACTC-----GATCA-----TT  
TAATTATTGAGTAAAAATTATTATCTTGAATTTATTACTTATATATACATAC-----AAGTAGATAAAATAAAAAA-  
TTAAAAATTGTAACAAA-TAAATAT-----TTTTATA-----GT  
ATCGAAAGATTATGAAATTATAAAATAATTAATAAAAAA---TTTCTTG-----TTACTT-AAAAAAGAA  
ATTAGGCAATATTTCTTTTTTGTATTCTTTAAGATATTTTAAATTTTATTTTATTAATTAGTTTAAACATTCA  
AAAGATTATTAGGTCAATGCTTAGAAAAATAAAAAATAATTTACTTAAAAATAATCTGAGTTGCATCAAATATAAAAAATA  
ATATACAATGATACTGTTTTGTTATAAAAAA-TCAGTTTATCTAAAAATAGATAAAATTAATATCAAAGAAGTTTTT  
TTATGAAAT-----AAAAAAACTTATTTGTCGAGCAGACCTCATCCTTGCAAGAGTTATCAATTGAG-AAAATTTTT  
AAAAAATAA?T???AAAATATATA?T???AAT?TTAAAAAATA?TA?AAA-CTTAAA---TAATTTGAGCTTTAGT  
AGAAAACTTACTAAATGCTAGCTTTCAGATTCAGGGAACTTAGGTTGAAAAAGTATAAGCAATCCTGAGCCAAATTT  
TATTCCTTTAAAAATAAGATAGGTGCAGAGACTCAATGGAAGCTATCCTAACGAAGAATATTTTAAGATTTTATT-AGTTA  
AGTAATTAATTAATAAAAAATAAATTTAACTAAAA-----TTTTATATATTAAGCGAGGATAAAGATAGAGTCCAATTT  
TACATGTTACTTTTAGCAACAATTTAAATTGTAGTAAAAAGAAAATCCGTTGGCTTTAGTGACCGTGAGGGTTCAAGTCC  
CTCTACCCCCA-----AAAGT-----CTAA-----TT-----TTTTCTTGACATAAGTT  
CCTAATTTATGTTACGATAGTCGAAACGAAACAA-TAAATAAAATATT??TT?A

>P86\_norvegica

AAATCGTGGTGCCTCGCACCTCGAGTTGTAGTCTGGAGAAGTGTCTCTGCAACGGACCAGACCCAAGTTCCTGGAAG

TGGCGTCAGAGAGGGTGAAAACCCCGTCGAGTCTGGACACTGTTGCAACACGAGGCACTGTCTGCGAGTCGAGCTGTTTG  
GGAATGCAGCTCTAAGTGGGTGGTAAATTCCATCCAAGGCTAAATATTGGCAAGAGACCGATAGCGAACAAGTACCGCGA  
GGGAAAGATGAAAAGGACTTTGAAAAGAGAGTTAAAAAGTGCTTGAAATTGCTGGGAGGGAAGCGAATGGAAGCTGCGGG  
TGTGCCCCGGTTGGATGTGGAACGGCTTCGGCTGGTCCGCCGCTCAACGCGGGGCACTGGTCAGCGTGGGCCATCGCGGC  
GGGACAAGAGCGGGATGTAGTTTCCTGCCTATGCCGTTGTGGTGGCCGAGGAACGAAGCGTGCG-CCACTTGTGG-CGTG  
GCA--TCCGTGCCAACTGCACGCTCGGGACGCTGGCGTATTGAGCTCTTCATCCGACCCGCTCTTGAAACACGGACCAAGG  
AGTCTAACATGTATGCGAGCCGGTGGGCGGCAAACCCATTGAGGCGCAAGTAACTGACA-TTT?A-AAAATTTGGAAGT  
AATAAAATTAGTTGCTGATTGTATTGAAAAAACA-----TTT-----AGTATCA  
-----ACTC-----GATCA-----TT  
TAATTATTGAGTAAAAATTATTATCTTGAATTTATTACTTATATATACATAC-----AAGTAGATAAAAATAAAAAA-  
TTAAAAATTGTAACAAA-TAAATAT-----TTTTTATA-----GT  
ATCGAAAGATTATGAAATTATAAAATAATTAATAAAAAA---TTTCTTG-----TTTACTT-AAAAAAGAA  
ATTAGGCAATATTTTCTTTTTTGTATTCTTTAAGATATTTTAAATTAATTTTATTTTATTAATTAGTTTAAACATTCA  
AAAGATTATTAGGTCAATGCTTAGAAAAATAAAAAATAATTTACTTAAAAATAATCTGAGTTGCATCAAATATAAAAAATA  
ATATACAATGATACTGTTTTGTTATAAAAAA-TCAGTTTATCTAAAAATAGATAAAATTAATATCAAAGAAGTTTTT  
TTATGAAAT-----AAAAAAAACCTATTTGTCGAGCAGACCTCATCCTTGCAAGAGTTATCAATTGAG-AAAATTTTT  
AAAAAATAA?T???AAAATATATA?T???AAT?TTAAAAAATA?TA?AAA-CTTAAA---TAATTTGAGCTTTAGT  
AGAAAACTTACTAAATGCTAGCTTTTTCAGATTCAGGGAACTTAGGTTGAAAAAGTATAAGCAATCCTGAGCCAAATTT  
TATTCCTTTAAAAATAAGATAGGTGCAGAGACTCAATGGAAGCTATCCTAACGAAGAATATTTTAAAGATTTTATT-AGTTA  
AGTAATTAATTAATAAAAAATAATTTAACTAAAA-----TTTTATATATTAAGCGAGGATAAAGATAGAGTCCAATTT  
TACATGTTACTTTTAGCAACAATTTAAATTGTAGTAAAAAGAAAATCCGTTGGCTTTAGTGACCGTGAGGGTTCAAGTCC  
CTCTACCCCCA-----AAAGT-----CTAA-----TT-----TTTTCTTGACATAAGTT  
CCTAATTTATGTTACGATAGTCGAAACGAAACAA-TAAATAAAATATT??TT?A

>P87\_norvegica

AAATCGTGGTGCCTCGCACCTCGAGTTGTAGTCTGGAGAAGTGTCTCTGCAACGGACCAGACCCAAGTTCAGTGGAAAG  
TGGCGTCAGAGAGGGTGAAAACCCCGTCGAGTCTGGACACTGTTGCAACACGAGGCACTGTCTGCGAGTCGAGCTGTTTG  
GGAATGCAGCTCTAAGTGGGTGGTAAATTCCATCCAAGGCTAAATATTGGCAAGAGACCGATAGCGAACAAGTACCGCGA  
GGGAAAGATGAAAAGGACTTTGAAAAGAGAGTTAAAAAGTGCTTGAAATTGCTGGGAGGGAAGCGAATGGAAGCTGCGGG  
TGTGCCCCGGTTGGATGTGGAACGGCTTCGGCTGGTCCGCCGCTCAACGCGGGGCACTGGTCAGCGTGGGCCATCGCGGC  
GGGACAAGAGCGGGATGTAGTTTCCTGCCTATGCCGTTGTGGTGGCCGAGGAACGAAGCGTGCG-CCACTTGTGG-CGTG  
GCA--TCCGTGCCAACTGCACGCTCGGGACGCTGGCGTATTGAGCTCTTCATCCGACCCGCTCTTGAAACACGGACCAAGG  
AGTCTAACATGTATGCGAGCCGGTGGGCGGCAAACCCATTGAGGCGCAAGTAACTGACA-TTT?A-AAAATTTGGAAGT  
AATAAAATTAGTTGCTGATTGTATTGAAAAAACA-----TTT-----AGTATCA  
-----ACTC-----GATCA-----TT  
TAATTATTGAGTAAAAATTATTATCTTGAATTTATTACTTATATATACATAC-----AAGTAGATAAAAATAAAAAA-  
TTAAAAATTGTAACAAA-TAAATAT-----TTTTTATA-----GT  
ATCGAAAGATTATGAAATTATAAAATAATTAATAAAAAA---TTTCTTG-----TTTACTT-AAAAAAGAA  
ATTAGGCAATATTTTCTTTTTTGTATTCTTTAAGATATTTTAAATTAATTTTATTTTATTAATTAGTTTAAACATTCA  
AAAGATTATTAGGTCAATGCTTAGAAAAATAAAAAATAATTTACTTAAAAATAATCTGAGTTGCATCAAATATAAAAAATA  
ATATACAATGATACTGTTTTGTTATAAAAAA-TCAGTTTATCTAAAAATAGATAAAATTAATATCAAAGAAGTTTTT  
TTATGAAAT-----AAAAAAAACCTATTTGTCGAGCAGACCTCATCCTTGCAAGAGTTATCAATTGAG-AAAATTTTT  
AAAAAATAA?T???AAAATATATA?T???AAT?TTAAAAAATA?TA?AAA-CTTAAA---TAATTTGAGCTTTAGT  
AGAAAACTTACTAAATGCTAGCTTTTTCAGATTCAGGGAACTTAGGTTGAAAAAGTATAAGCAATCCTGAGCCAAATTT  
TATTCCTTTAAAAATAAGATAGGTGCAGAGACTCAATGGAAGCTATCCTAACGAAGAATATTTTAAAGATTTTATT-AGTTA  
AGTAATTAATTAATAAAAAATAATTTAACTAAAA-----TTTTATATATTAAGCGAGGATAAAGATAGAGTCCAATTT  
TACATGTTACTTTTAGCAACAATTTAAATTGTAGTAAAAAGAAAATCCGTTGGCTTTAGTGACCGTGAGGGTTCAAGTCC  
CTCTACCCCCA-----AAAGT-----CTAA-----TT-----TTTTCTTGACATAAGTT  
CCTAATTTATGTTACGATAGTCGAAACGAAACAA-TAAATAAAATATT??TT?A

>Timmia\_sibirica\_2

AAATCGTGGTGCCTCGCACCTCGAATTGTAATCTGGAGAAGTGTCTCTGCAACGGACCAGACCCAAGTTCAGTGGAAAG  
TGGCGTCAGAGAGGGTGAAAACCCCGTCGAGTCTGGACACTGTTGCAACACGAGGCACTGTCTGCGAGTCGAGCTGTTTG  
GGAATGCAGCTCTAAGTGGGTGGTAAATTCCATCCAAGGCTAAATATTGGCAAGAGACCGATAGCGAACAAGTACCGCGA  
GGGAAAGATGAAAAGGACTTTGATAAGAGAGTTAAAAAGTGCTTGAAATTGCTGGGAGGGAAGCGAATGGAATCTGCGGG  
TGTGCCCCGGTTGGATGTGGAACGGCTTCGGCTGGTCCGCCGCTCAACGCGGGGCACTGGTCAGCGTGGGCCATCGCGGC  
GGGACAAGAGCGGGATGTAGTTTCCCGCTATGCCGTTGTGGTGGCCGAGGAACGAAGCGTGCG-CCACTTGTGG-CGTG  
GCA--TCCGTGCCAACTGCACGCTCGGGACGCTGGCGTATTGAGCTCTTCATCCGACCCGCTCTTGAAACACGGACCAAGG  
AGTCTAACATGTATGCGAGCCGGTGGGCGGCAAACCCATTGAGGCGCAAGTAACTGACA-TTT?A-AAAATTTGGAAGT  
AATAAAATTAGTTGCTGATTGTATTGAAAAA-TA-----TTT-----AGTATCA

-----ACTC-----GATCA-----TT  
TAATTATTGAGTAAAAATTATTATCTTGAATTTATTACTTATATATACATAC-----AAGTGGATAAAATAAAAAA-  
TTAAAAATTGTAACAAA-TAAATAT-----TTTTTATA-----GT  
ATCGAAAGATTATGAAATTATAAAATAATTTAAAAATAAAAAA---TTTCTTG-----TTTACTT-AAAAAAGAA  
ATTGGGCAATATTTTATTTTTTGTATTCTTTAAGATGTTTTTAATTAAATTTTATTTTATTAATTAGTTTAAACATTCA  
AAAGATTATTAGGTCAATGCTTAGAAAAATAAAAAATAATTTACTTAAAAATAATCTGAGTTGCATCAAATATAAAAAATA  
ATATACAATGATACTGTTTTGTTATAAAAAA-TCAGTTTATCTAAAAAATAGATAAAATTAAATATCAAAGAAGTTTTT  
TTATGAAAT-----AAAAAAAACCTATTGTGTCGAGCAGACCTCATCCTTGCAAGAGTTATCAATTGAG-AAATTTTTT  
AAAAAATAAAT?T??TAAATATATA?T??TAAATTTAAAAAATAAATA?TA?AAA-CTTAAA---TAATTTGAGCTTTAGT  
AGAAAACTTACTAAATGCTAGCTTTTTCAGATTTCAGGGAACTTAGGTTGAAAAAGTATAAGCAATCCTGAGCCAAATTT  
TATTCCTTTAAAAATAAGATAGGTGCAGAGACTCAATGGAAGCTATCCTAACGAAGAATATTTTAAAGATTTTATT-AGTTA  
AGTAATTAATTAATAAAAAATAAATTTAACTAAAA-----TTTTATATATTAAGCGAGGATAAAGATAGAGTCCAATTT  
TACATGTTACTTTTTAGCAACAATTTAAATTGTAGTAAAAAGAAAAATCCGTTGGCTTTAGTGACCGTGAGGGTTCAAGTCC  
CTCTACCCCCA-----AAAGT-----CTAA-----TT-----TTTTCTTGACATAAGTT  
CCTAATTTATGTTACGATAGTCGAAACGAAACAA-TAAATAAAATATT??TT?A

>Timmia\_sibirica\_3

AAATCGTGGTGCCTCGCACCTCGAATTGTAGTCTGGAGAAGTGTCTCTGCAACGGACCAGACCCAAGTTCACTGGAAAG  
TGGCGTCAGAGAGGGTGAAAACCCCGTCGAGTCTGGACACTGTTGCAACACGAGGCACTGTCTGCGAGTCGAGCTGTTTG  
GGAATGCAGCTCTAAGTGGGTGGTAAATTCATCCAAGGCTAAATATTGGCAAGAGACCGATAGCGAACAAGTACCGCGA  
GGGAAAGATGAAAAGGACTTTGAAAAGAGAGTTAAAAAGTGCTTGAAATGCTGGGAGGGAAGCGAATGGAAGCTGCGGG  
TGTGCCCCGGTTGGATGTGGAACGGCTTCGGCTGGTCCGCCGCTCAACGCGGGGCACTGGTCAGCGTGGGCCATCGCGGC  
GGGACAAGAGCGGGATGTAGTTTCCCGCTATGCCGTTGTGGTGGCCGAGGAACGAAGCGTGCG-CCACTTGTGG-CGTG  
GCA--TCCGTGCCA-CTGCACGCTCGGGACGCTGGCGTATTGAGCTCTTCATCCGACCCGCTCTTGAAACACGGACCAAGG  
AGTCTAACATGTATGCGAGCCGGTGGGCGGCAAACCCATTGAGGCGCAAGTAACTGACA-TTT?T-AAAATTTGGAAGT  
AATAAAATTAGTTGCTGATTGTATTGAAAAA-TA-----TTT-----AGTATCA

-----ACTC-----GATCA-----TT  
TAATTATTGAGTAAAAATTATTATCTTGAATTTATTACTTATATATACATAC-----AAGTGGATAAAATAAAAAA-  
TTAAAAATTGTAACAAA-TAAATAT-----TTTTTATA-----GT  
ATCGAAAGATTATGAAATTATAAAATAATTTAAAAATAAAAAA---TTTCTTG-----TTTACTT-AAAAAAGAA  
ATTGGGCAATATTTTATTTTTTGTATTCTTTAAGATGTTTTTAATTAAATTTTATTTTATTAATTAGTTTAAACATTCA  
AAAGATTATTAGGTCAATGCTTAGAAAAATAAAAAATAATTTACTTAAAAATAATCTGAGTTGCATCAAATATAAAAAATA  
ATATACAATGATACTGTTTTGTTATAAAAAA-TCAGTTTATCTAAAAAATAGATAAAATTAAATATCAAAGAAGTTTTT  
TTATGAAAT-----AAAAAAAACCTATTGTGTCGAGCAGACCTCATCCTTGCAAGAGTTATCAATTGAG-AAATTTTTT  
AAAAAATAAAT?T??TAAATATATA?T??TAAATTTAAAAAATAAATA?TA?AAA-NNNNNN--NNNNNNNNNNNNNNNN  
NNNNNNNNNNNNNNNNNGCTAGCTTTTTCAGATTTCAGGGAACTTAGGTTGAAAAAGTATAAGCAATCCTGAGCCAAATTT  
TATTCCTTTAAAAATAAGATAGGTGCAGAGACTCAATGGAAGCTATCCTAACGAAGAATATTTTAAAGATTTTATT-AATTA  
AGTAATTAATTAATAAAAAATAAATTTAACTAAAA-----TTTTATATATTAAGCGAGGATAAAGATAGAGTCCAATTT  
TACATGTTACTTTTTAGCAATAATTTAAATTGTAGTAAAAAGAAAAATCCGTTGGCTTTAGTGACCGTGAGGGTTCAAGTCC  
CTCTACCCCCAACCCCAAAGT-----CTAA-----TT-----TTTTCTTGACATAAGTT  
CCTAATTTATGTTACGATAGCCGAAACGAAACNN-TAAATAAAATAAT??TT?A

>P74\_sibirica

AAATCGTGGTGCCTCGCACCTCGAATTGTAGTCTGGAGAAGTGTCTCTGCAACGGACCAGACCCAAGTTCACTGGAAAG  
TGGCGTCAGAGAGGGTGAAAACCCCGTCGAGTCTGGACACTGTTGCAACACGAGGCACTGTCTGCGAGTCGAGCTGTTTG  
GGAATGCAGCTCTAAGTGGGTGGTAAATTCATCCAAGGCTAAATATTGGCAAGAGACCGATAGCGAACAAGTACCGCGA  
GGGAAAGATGAAAAGGACTTTGAAAAGAGAGTTAAAAAGTGCTTGAAATGCTGGGAGGGAAGCGAATGGAAGCTGCGGG  
TGTGCCCCGGTTGGATGTGGAACGGCTTCGGCTGGTCCGCCGCTCAACGCGGGGCACTGGTCAGCGTGGGCCATCGCGGC  
GGGACAAGAGCGGGATGTAGTTTCCCGCTATGCCGTTGTGGTGGCCGAGGAACGAAGCGTGCG-CCACTTGTGG-CGTG  
GCA--TCCGTGCCAAGTGCACGCTCGGGACGCTGGCGTATTGAGCTCTTCATCCGACCCGCTCTTGAAACACGGACCAAGG  
AGTCTAACATGTATGCGAGCCGGTGGGCGGCAAACCCATTGAGGCGCAAGTAACTGACA-TTT?A-AAAATTTGGAAGT  
AATAAAATTAGTTGCTGATTGTATTGAAAAA-TA-----TTT-----AGTATCA

-----ACTC-----GATCA-----TT  
TAATTATTGAGTAAAAATTATTATCTTGAATTTATTACTTATATATACATAC-----AAGTGGATAAAATAAAAAA-  
TTAAAAATTGTAACAAA-TAAATAT-----TTTTTATA-----GT  
ATCGAAAGATTATGAAATTATAAAATAATTTAAAAATAAAAAA---TTTCTTG-----TTTACTT-AAAAAAGAA  
ATTGGGCAATATTTTATTTTTTGTATTCTTTAAGATGTTTTTAATTAAATTTTATTTTATTAATTAGTTTAAACATTCA  
AAAGATTATTAGGTCAATGCTTAGAAAAATAAAAAATAATTTACTTAAAAATAATCTGAGTTGCATCAAATATAAAAAATA  
ATATACAATGATACTGTTTTGTTATAAAAAA-TCAGTTTATCTAAAAAATAGATAAAATTAAATATCAAAGAAGTTTTT  
TTATGAAAT-----AAAAAAAACCTATTGTGTCGAGCAGACCTCATCCTTGCAAGAGTTATCAATTGAG-AAATTTTTT

AAAAAAAAAA?T???AAAATATATA?T???AAT?TTAAAAAAAAATA?TA?AAA-CTTAAA---TAATTTGAGCTTTAGT  
AGAAAAACTTACTAAATGCTAGCTTTCAGATTCAGGGAACTTAGGTTGAAAAAGTATAAGCAATCCTGAGCCAAATTT  
TATTCCTTTAAAAATAAGATAGGTGCAGAGACTCAATGGAAGCTATCCTAACGAAGAATATTTTAAGATTTTATT-AATTA  
AGTAATTAATTAATAAAAAATAAATTTAACTAAAA-----TTTTATATATTAAGCGAGGATAAAGATAGAGTCCAATTT  
TACATGTTACTTTTAGCAATAATTTAAATTGTAGTAAAAAGAAAATCCGTTGGCTTTAGTGACCGTGAGGGTTCAAGTCC  
CTCTACCCCCAACCCCAAAAGT-----CTAA-----TT-----TTTTCTTGACATAAGTT  
CCTAATTTATGTTACGATAGCCGAAACGAAACAA-TAAATAAAATAAT??TT?A

>P88\_sibirica

AAATCGTGGTGCCTCGCACCTCGAATTGTAGTCTGGAGAAGTGTCTCTGCAACGGACCAGACCCAAGTTCCTGGAAG  
TGGCGTCAGAGAGGGTGAAAACCCCGTCGAGTCTGGACACTGTTGCAACACGAGGCCTGTCTGCGAGTCGAGCTGTTTG  
GGAATGCAGCTCTAAGTGGGTGGTAAATTCCATCCAAGGCTAAATATTGGCAAGAGACCGATAGCGAACAAGTACCGCGA  
GGGAAAGATGAAAAGGACTTTGAAAAGAGAGTTAAAAAGTGCTTGAAATTGCTGGGAGGGAAGCGAATGGAAGCTGCGGG  
TGTGCCCCGGTTGGATGTGGAACGGCTTCGGCTGGTCCGCCGCTCAACGCGGGGCACTGGTCAGCGTGGGCCATCGCGGC  
GGGACAAGAGCGGGATGTAGTTTCCCGCCTATGCCGTTGTGGTGGCCGAGGAACGAAGCGTGCG-CCACTTGTGG-CGTG  
GCA--TCCGTGCCAACTGCACGCTCGGGACGCTGGCGTATTGAGCTCTTCATCCGACCCGCTCTTGAAACACGGACCAAGG  
AGTCTAACATGTATGCGAGCCGGTGGGCGGCAAACCCATTGAGGCGCAAGTAACTGACA-TTT?A-AAAATTTGGAAGT  
AATAAAATTAGTTGCTGATTGTATTGAAAAAACA-----TTT-----AGTATCA  
-----ACTC-----GATCA-----TT  
TAATTATTGAGTAAAAATTATTATCTTGAATTTATTACTTATATATACATAC-----AAGTAGATAAAATAAAAAAA-  
TTAAAAATTGTAACAAA-TAAATAT-----TTTTATA-----GT  
ATCGAAAGATTATGAAATTATAAAATAATTAATAAAAAA---TTTCTTG-----TTACTT-AAAAAAGAA  
ATTAGGCAATATTTTATTTTTTGTATTCTTTAAGATATTTTAAATTTTATTTTATTAATTAGTTTAACATTCA  
AAAGATTATTAGGTCAATGCTTAGAAAAATAAAAAATAATTTACTTAAAAATAATCTGAGTTGCATCAAATATAAAAAATA  
ATATACAATGATACTGTTTTGTTATAAAAAA-TCAGTTTATCTAAAAAATAGATAAAATTAATATCAAAGAAGTTTTT  
TTATGAAAT-----AAAAAACTTATTTGTCGAGCAGACCTCATCCTTGCAAGAGTTATCAATTGAG-AAAATTTTT  
AAAAAATAA?T???AAAATATATA?T???AAT?TTAAAAAAAAATA?T???AA-NNNNNN--NNNNNNNNNNNNNNNN  
NNNNNACTTACTAAATGCTAGCTTTCAGATTCAGGGAACTTAGGTTGAAAAAGTATAAGCAATCCTGAGCCAAATTT  
TATTCCTTTAAAAATAAGATAGGTGCAGAGACTCAATGGAAGCTATCCTAACGAAGAATATTTTAAGATTTTATT-AGTTA  
AGTAATTAATTAATAAAAAATAAATTTAACTAAAA-----TTTTATATATTAAGCGAGGATAAAGATAGAGTCCAATTT  
TACATGTTACTTTTAGCAACAATTTAAATTGTAGTAAAAAGAAAATCCGTTGGCTTTAGTGACCGTGAGGGTTCAAGTCC  
CTCTACCCCCA-----AAAGT-----CTAA-----TT-----TTTTCTTGACATAAGTT  
CCTAATTTATGTTACGATAGTCGAAACGAAACAA-TAAATAAAATATT??TT?A

>Timmia\_norvegica\_excurrens\_2

AAATCGTGGTGCCTCGCACCTCGAATTGTAGTCTGGAGAAGTGTCTCTGCGAGCGGACCAGACCCAAGTTCCTGGAAG  
TGGCGTCAGAGAGGGTGAAAACCCCGTCGAGTCTGGACACTGTTGCAACACGAGGCGCTGTCTGCGAGTCGAGCTGTTTG  
GGAATGCAGCTCTAAGTGGGTGGTAAATTCCATCCAAGGCTAAATATTGGCAAGAGACCGATAGCGAACAAGTACCGCGA  
GGGAAAGATGAAAAGGACTTTGAAAAGAGAGTTAAAAAGTGCTTGAAATTGCTGGGAGGGAAGCGAATGGAAGCTGCGGG  
TGTGCCCCGGTTGGATGTGGAACGGCTTCGGCTGGTCCGCCGCTCAACGCGGGGCACTGGTCAGCGTGGGCCATCGCGGC  
GGGACAAGAGCGGGATGTAGTTTCCCGCCTATGCCGTTGTGGTGGCCGAGGAACGAAGCGTGCG-CCACTTGTGG-CGTG  
GCA--TCCGTGCCAACTGCACGCTCGGGACGCTGGCGTATTGAGCTCTTCATCCGACCCGCTCTTGAAACACGGACCAAGG  
AGTCTAACATGTATGCGAGCCGGTGGGCGGCAAACCCATTGAGGCGCAAGTAACTGACA-TTT?A-AAAATTTATAAGT  
AATAAAATTAGTTGCTGATTGTATTGAAAAAATA-----TTT-----AGTATCA  
-----ACTC-----GATCA-----TT  
TAATTATTGAGTAAAAATTATTATCTTGAATTTATTACTTATATATACATAC-----AA-----AATAAAAAAA  
TTAAAAATTGTAACAAA-TAAATAT-----TTTTATA-----GT  
ATCGAAAGATTATGAAATTATAAAATAATTAATAAAAAA---TTTTTTG-----TTTATTT-AAAAAAGAA  
ATTAGGCAATATTTTATTTTTTGTATTCTTTAATACGTTTTTAATTAATTAATTTTATTTTATTAATTAGTTTAACATTCA  
AAAGATTATTAGGTCAATGCTTAGAAAAATAAAAAATAATTTACTTAAAAATAATCTGAGTTGCATCAAATATAAAAAATA  
ATATACAATGATACTGTTTTGTTATAGAAAAA-TCTGTTTATCTAAAAAATAGACAAAATTAATATCAAAGAAGTTTTT  
TTATGAAAT-----AAAAAACTTATTTGTCGAGCAGACCTCATCCTTGCAAGAGTTATCAATTGAG-AAAATTTTT  
AAAAAATAA?T???TAAATATA?T???AAT?TTAAAAAAAAATAA?AAA-NNNNNN--NNNNNTGAGCTTTAGT  
AGAAAACTTA-TAAATGCTAGCTTTCAGATTCAGGGAACTTAGGTTGAAAAAGTATAAGCAATCCTGAGCCAAATTT  
TATTCCTTTAAAAATAAAATAGGTGCAGAGACTCAATGGAAGCTATCCTAACGAAGAATATTTTAAGATTTTATT-AATTA  
AGTAATTAATTAATAAAAGTAAATTTAACTAAAAATTTCTCTTTTATATATTAAGCGAGGATAAAGATAGAGTCCAATTT  
TACATGTTACTTTTAGCAACAATTTAAATTGTAGTAAAAAGAAAATCCGTTGGCTTTAGTGACCGTGAGGGTTCAAGTCC  
CTCTACCCCCA-----AAAGT-----CTAA-----TT-----TTTTCTTGACATAAGTT  
CTTAATTTATGTTACGATAACCGAAACGAAACAA-TTAATAAAAAATT??TT?A

>P62\_comata

AAATCGTGGTGCCTCGCACCTCGAATTGTAGTCTGGAGAAGTGTCTCTGCAGCGGACCAGACCCAAGTTCACCTGGAAG  
TGGCGTCAGAGAGGGTGAACACCCCGTCGAGTCTGGACACTGTTGCAACACGAGGCGCTGTCTGCGAGTCGAGCTGTTTG  
GGAATGCAGCTCTAAGTGGGTGGTAAATTCATCCAAGGCTAAATATTGGCAAGAGACCGATAGCGAACAAGTACCGCGA  
GGGAAAGATGAAAAGGACTTTGAAAAGAGAGTTAAAAAGTGCTTGAAATTGCTGGGAGGGAAGCGAATGGAAGCTGCGGG  
TGTGCCCCGGTTGGATGTGGAACGGCTTCGGCTGGTCCGCCGCTCAACGCGGGGCACTGGTCAGCGTGGGCCATCGCGGC  
GGGACAAGAGCGGGATGTAGTTTCCCGCCTATGCCGTTGTGGTGGCCGAGGAACGAAGCGTGCG-CCACTTGTGG-CGTG  
GCA--TCCGTGCCAACTGCACGCTCGGGACGCTGGCGTATTGAGCTCTTCATCCGACCCGCTCTTGAAACACGGACCAAGG  
AGTCTAACATGTATGCGAGCCGGTGGGCGGCAAACCCATTGAGGCGCAAGTAACTGACA-TTT?A-AAAATTTATAAGT  
AATAAAATTAGTTGCTGATTGTATTGAAAAAATA-----TTT-----AGTATCA  
-----ACTC-----GATCA-----TT  
TAATTATTGAGTAAAAATTATTATCTTGAATTTATTACTTATATATACATAC-----AA-----AATAAAAAAA  
TTAAAAATTGTAACAAA-TAAATAT-----TTTTTATA-----GT  
ATCGAAAGATTATGAAATTATAAAATAATTAATAAAAAAT---TTTTTTG-----TTTATTT-AAAAAAGAA  
ATTAGGCAATATTTTATTTTTTGTATTCTTTAATACGTTTTTAATTAATTTTATTTTATTAATTAGTTTAACATTCA  
AAAGATTATTAGGTCAATGCTTAGAAAAATAAAAAATAATTTACTAAAAATAATCTGAGTTGCATCAAATATAAAAAATA  
ATATACAATGATACTGTTTTGTTATAGAAAAA-TCTGTTTATCTAAAAATAGACAAAATTAAATATCAAAGAAGTTTTT  
TTATGAAAT-----AAAAAAAACCTATTTGTCGAGCAGACCTCATCCTTGCAAGAGTTATCAATTGAG-AAAATTTTT  
AAAAAATAA?T???TAAATATA?T???AAT?TAAAAAATA?TA?AAA-CTTAAA---TAATTTGAGCTTTAGT  
AGAAAACTTACTAAATGCTAGCTTTTTCAGATTTCAGGGAACTTAGGTTGAAAAAGTATAAGCAATCCTGAGCCAAATTT  
TATTCCTTTAAAAATAAAATAGGTGCAGAGACTCAATGGAAGCTATCCTAACGAAGAATATTTTAAGATTTTATT-AATTA  
AGTAATTAATTAATAAAAGTAAATTTAACTAAAAATTTTCTCTTTTATATATTAAGCGAGGATAAAGATAGAGTCCAATTT  
TACATGTTACTTTTAGCAACAATTTAAATTGTAGTAAAAAGAAAATCCGTTGGCTTTAGTGACCGTGAGGGTTCAAGTCC  
CTCTACCCCA-----AAAGT-----CTAA-----TT-----TTTTCTTGACATAAGTT  
CTTAATTTATGTTACGATAACCGAAACGAAACAA-TAAATAAAAAATT?TT?A

>P63\_comata

AAATCGTGGTGCCTCGCACCTCGAATTGTAGTCTGGAGAAGTGTCTCTGCAGCGGACCAGACCCAAGTTCACCTGGAAG  
TGGCGTCAGAGAGGGTGAACACCCCGTCGAGTCTGGACACTGTTGCAACACGAGGCGCTGTCTGCGAGTCGAGCTGTTTG  
GGAATGCAGCTCTAAGTGGGTGGTAAATTCATCCAAGGCTAAATATTGGCAAGAGACCGATAGCGAACAAGTACCGCGA  
GGGAAAGATGAAAAGGACTTTGAAAAGAGAGTTAAAAAGTGCTTGAAATTGCTGGGAGGGAAGCGAATGGAAGCTGCGGG  
TGTGCCCCGGTTGGATGTGGAACGGCTTCGGCTGGTCCGCCGCTCAACGCGGGGCACTGGTCAGCGTGGGCCATCGCGGC  
GGGACAAGAGCGGGATGTAGTTTCCCGCCTATGCCGTTGTGGTGGCCGAGGAACGAAGCGTGCG-CCACTTGTGG-CGTG  
GCA--TCCGTGCCAACTGCACGCTCGGGACGCTGGCGTATTGAGCTCTTCATCCGACCCGCTCTTGAAACACGGACCAAGG  
AGTCTAACATGTATGCGAGCCGGTGGGCGGCAAACCCATTGAGGCGCAAGTAACTGACA-TTT?A-AAAATTTATAAGT  
AATAAAATTAGTTGCTGATTGTATTGAAAAAATA-----TTT-----AGTATCA  
-----ACTC-----GATCA-----TT  
TAATTATTGAGTAAAAATTATTATCTTGAATTTATTACTTATATATACATAC-----AA-----AATAAAAAAA  
TTAAAAATTGTAACAAA-TAAATAT-----TTTTTATA-----GT  
ATCGAAAGATTATGAAATTATAAAATAATTAATAAAAAAT---TTTTTTG-----TTTATTT-AAAAAAGAA  
ATTAGGCAATATTTTATTTTTTGTATTCTTTAATACGTTTTTAATTAATTTTATTTTATTAATTAGTTTAACATTCA  
AAAGATTATTAGGTCAATGCTTAGAAAAATAAAAAATAATTTACTAAAAATAATCTGAGTTGCATCAAATATAAAAAATA  
ATATACAATGATACTGTTTTGTTATAGAAAAA-TCTGTTTATCTAAAAATAGACAAAATTAAATATCAAAGAAGTTTTT  
TTATGAAAT-----AAAAAAAACCTATTTGTCGAGCAGACCTCATCCTTGCAAGAGTTATCAATTGAG-AAAATTTTT  
AAAAAATAA?T???TAAATATA?T???AAT?TAAAAAATA?TA?AAA-CTTAAA---TAATTTGAGCTTTAGT  
AGAAAACTTACTAAATGCTAGCTTTTTCAGATTTCAGGGAACTTAGGTTGAAAAAGTATAAGCAATCCTGAGCCAAATTT  
TATTCCTTTAAAAATAAAATAGGTGCAGAGACTCAATGGAAGCTATCCTAACGAAGAATATTTTAAGATTTTATT-AATTA  
AGTAATTAATTAATAAAAGTAAATTTAACTAAAAATTTTCTCTTTTATATATTAAGCGAGGATAAAGATAGAGTCCAATTT  
TACATGTTACTTTTAGCAACAATTTAAATTGTAGTAAAAAGAAAATCCGTTGGCTTTAGTGACCGTGAGGGTTCAAGTCC  
CTCTACCCCA-----AAAGT-----CTAA-----TT-----TTTTCTTGACATAAGTT  
CTTAATTTATGTTACGATAACCGAAACGAAACAA-TAAATAAAAAATT?TT?A

>P66\_comata

AAATCGTGGTGCCTCGCACCTCGAATTGTAGTCTGGAGAAGTGTCTCTGCAGCGGACCAGACCCAAGTTCACCTGGAAG  
TGGCGTCAGAGAGGGTGAACACCCCGTCGAGTCTGGACACTGTTGCAACACGAGGCGCTGTCTGCGAGTCGAGCTGTTTG  
GGAATGCAGCTCTAAGTGGGTGGTAAATTCATCCAAGGCTAAATATTGGCAAGAGACCGATAGCGAACAAGTACCGCGA  
GGGAAAGATGAAAAGGACTTTGAAAAGAGAGTTAAAAAGTGCTTGAAATTGCTGGGAGGGAAGCGAATGGAAGCTGCGGG  
TGTGCCCCGGTTGGATGTGGAACGGCTTCGGCTGGTCCGCCGCTCAACGCGGGGCACTGGTCAGCGTGGGCCATCGCGGC  
GGGACAAGAGCGGGATGTAGTTTCCCGCCTATGCCGTTGTGGTGGCCGAGGAACGAAGCGTGCG-CCACTTGTGG-CGTG  
GCA--TCCGTGCCAACTGCACGCTCGGGACGCTGGCGTATTGAGCTCTTCATCCGACCCGCTCTTGAAACACGGACCAAGG  
AGTCTAACATGTATGCGAGCCGGTGGGCGGCAAACCCATTGAGGCGCAAGTAACTGACA-TTT?A-AAAATTTATAAGT

AATAAAATTAGTTGCTGATTGTATTGAAAAAATA-----TTT-----AGTATCA  
-----ACTC-----GATCA-----TT  
TAATTATTGAGTAAAAATTATTATCTTGAATTTATTACTTATATATACATAC-----AA-----AATAAAAAAA  
TTAAAAATTGTAACAAA-TAAATAT-----TTTTTATA-----GT  
ATCGAAAGATTATGAAATTATAAAATAATTTAAATAAAAAAT---TTTTTTG-----TTTATTT-AAAAAAGAA  
ATTAGGCAATATTTTATTTTTTGTATTCTTTAATACGTTTTTAATTAAATTTTATTTTATTAATTAGTTTAAACATTCA  
AAAGATTATTAGGTCAATGCTTAGAAAAATAAAAAATAATTTACTAAAAATAATCTGAGTTGCATCAAATATAAAAAATA  
ATATACAATGATACTGTTTTGTTATAGAAAAA-TCTGTTTATCTAAAAAATAGACAAAATTAAATATCAAAGAAGTTTTT  
TTATGAAAT-----AAAAAAAACCTATTTGTCGAGCAGACCTCATCCTTGCAAGAGTTATCAATTGAG-AAAATTTTT  
AAAAAATAAAT?T???TAAATATA?T???AAT?TTAAAAAATAA?TA?AAA-CTTAAA---TAATTTGAGCTTTAGT  
AGAAAACTTACTAAATGCTAGCTTTTCTAGATTCAGGGAACTTAGGTTGAAAAAGTATAAGCAATCCTGAGCCAAATTT  
TATTCCTTTAAAAATAAAATAGGTGCAGAGACTCAATGGAAGCTATCCTAACGAAGAATATTTTAAAGATTTTATT-AATTA  
AGTAATTAATTAATAAAAGTAAATTTAACTAAAAATTTTCTCTTTTATATATTAAGCGAGGATAAAAGATAGAGTCCAATTT  
TACATGTTACTTTTGTAGCAACAATTTAAATTGTAGTAAAAAGAAAAATCCGTTGGCTTTAGTGACCGTGAGGGTTCAAGTCC  
CTCTACCCCCA-----AAAGT-----CTAA-----TT-----TTTTCTTGACATAAGTT  
CTTAATTTATGTTACGATAACCGAAACGAAACAA-TAAATAAAAAATT?TT?A

>P67\_comata

AAATCGTGGTGCCTCGCACCTCGAATTGTAGTCTGGAGAAGTGTCTCTGCAGCGGACCAGACCCAAGTTCCTGAAAG  
TGGCGTCAGAGAGGGTGAAAACCCCGTCGAGTCTGGACACTGTTGCAACACGAGGCGCTGTCTGCGAGTCGAGCTGTTTG  
GGAATGCAGCTCTAAGTGGGTGGTAAATTCATCCAAGGCTAAATATTGGCAAGAGACCGATAGCGAACAAGTACCGCGA  
GGGAAAGATGAAAAGGACTTTGAAAAGAGAGTTAAAAAGTGCTTGAAATTGCTGGGAGGGAAGCGAATGGAAGCTGCGGG  
TGTGCCCCGGTTGGATGTGGAACGGCTTCGGCTGGTCCGCCGCTCAACGCGGGGCACTGGTCAGCGTGCGGCCATCGCGGC  
GGGACAAGAGCGGGATGTAGTTTCCCGCTATGCCGTTGTGGTGGCCGAGGAACGAAGCGTGCG-CCACTTGTGG-CGTG  
GCA--TCCGTGCCAACTGCACGCTCGGGACGCTGGCGTATTGAGCTCTTCATCCGACCCGCTCTTGAAACACGGACCAAGG  
AGTCTAACATGTATGCGAGCCGGTGGGCGGCAAACCCATTGAGGCGCAAGTAACTGACA-TTT?A-AAAATTTATAAGT  
AATAAAATTAGTTGCTGATTGTATTGAAAAAATA-----TTT-----AGTATCA  
-----ACTC-----GATCA-----TT  
TAATTATTGAGTAAAAATTATTATCTTGAATTTATTACTTATATATACATAC-----AA-----AATAAAAAAA  
TTAAAAATTGTAACAAA-TAAATAT-----TTTTTATA-----GT  
ATCGAAAGATTATGAAATTATAAAATAATTTAAATAAAAAAT---TTTTTTG-----TTTATTT-AAAAAAGAA  
ATTAGGCAATATTTTATTTTTTGTATTCTTTAATACGTTTTTAATTAAATTTTATTTTATTAATTAGTTTAAACATTCA  
AAAGATTATTAGGTCAATGCTTAGAAAAATAAAAAATAATTTACTAAAAATAATCTGAGTTGCATCAAATATAAAAAATA  
ATATACAATGATACTGTTTTGTTATAGAAAAA-TCTGTTTATCTAAAAAATAGACAAAATTAAATATCAAAGAAGTTTTT  
TTATGAAAT-----AAAAAAAACCTATTTGTCGAGCAGACCTCATCCTTGCAAGAGTTATCAATTGAG-AAAATTTTT  
AAAAAATAAAT?T???TAAATATA?T???AAT?TTAAAAAATAA?TA?AAA-CTTAAA---TAATTTGAGCTTTAGT  
AGAAAACTTACTAAATGCTAGCTTTTCTAGATTCAGGGAACTTAGGTTGAAAAAGTATAAGCAATCCTGAGCCAAATTT  
TATTCCTTTAAAAATAAAATAGGTGCAGAGACTCAATGGAAGCTATCCTAACGAAGAATATTTTAAAGATTTTATT-AATTA  
AGTAATTAATTAATAAAAGTAAATTTAACTAAAAATTTTCTCTTTTATATATTAAGCGAGGATAAAAGATAGAGTCCAATTT  
TACATGTTACTTTTGTAGCAACAATTTAAATTGTAGTAAAAAGAAAAATCCGTTGGCTTTAGTGACCGTGAGGGTTCAAGTCC  
CTCTACCCCCA-----AAAGT-----CTAA-----TT-----TTTTCTTGACATAAGTT  
CTTAATTTATGTTACGATAACCGAAACGAAACAA-TAAATAAAAAATT?TT?A

>P68\_comata

AAATCGTGGTGCCTCGCACCTCGAATTGTAGTCTGGAGAAGTGTCTCTGCAGCGGACCAGACCCAAGTTCCTGAAAG  
TGGCGTCAGAGAGGGTGAAAACCCCGTCGAGTCTGGACACTGTTGCAACACGAGGCGCTGTCTGCGAGTCGAGCTGTTTG  
GGAATGCAGCTCTAAGTGGGTGGTAAATTCATCCAAGGCTAAATATTGGCAAGAGACCGATAGCGAACAAGTACCGCGA  
GGGAAAGATGAAAAGGACTTTGAAAAGAGAGTTAAAAAGTGCTTGAAATTGCTGGGAGGGAAGCGAATGGAAGCTGCGGG  
TGTGCCCCGGTTGGATGTGGAACGGCTTCGGCTGGTCCGCCGCTCAACGCGGGGCACTGGTCAGCGTGCGGCCATCGCGGC  
GGGACAAGAGCGGGATGTAGTTTCCCGCTATGCCGTTGTGGTGGCCGAGGAACGAAGCGTGCG-CCACTTGTGG-CGTG  
GCA--TCCGTGCCAACTGCACGCTCGGGACGCTGGCGTATTGAGCTCTTCATCCGACCCGCTCTTGAAACACGGACCAAGG  
AGTCTAACATGTATGCGAGCCGGTGGGCGGCAAACCCATTGAGGCGCAAGTAACTGACA-TTT?A-AAAATTTATAAGT  
AATAAAATTAGTTGCTGATTGTATTGAAAAAATA-----TTT-----AGTATCA  
-----ACTC-----GATCA-----TT  
TAATTATTGAGTAAAAATTATTATCTTGAATTTATTACTTATATATACATAC-----AA-----AATAAAAAAA  
TTAAAAATTGTAACAAA-TAAATAT-----TTTTTATA-----GT  
ATCGAAAGATTATGAAATTATAAAATAATTTAAATAAAAAAT---TTTTTTG-----TTTATTT-AAAAAAGAA  
ATTAGGCAATATTTTATTTTTTGTATTCTTTAATACGTTTTTAATTAAATTTTATTTTATTAATTAGTTTAAACATTCA  
AAAGATTATTAGGTCAATGCTTAGAAAAATAAAAAATAATTTACTAAAAATAATCTGAGTTGCATCAAATATAAAAAATA  
ATATACAATGATACTGTTTTGTTATAGAAAAA-TCTGTTTATCTAAAAAATAGACAAAATTAAATATCAAAGAAGTTTTT



>P69 comata

>P70 comata

AAATCGTGGTGCCTCGCACCTGCAATTGTAGTCTGGAGAAGTGTCTCTGCAGCGACCAGACCAAGTTCACCTGGAAGG  
TGGCGTCAGAGAGGGTGAAAACCCCGTCGAGTCTGGACACTGTTGCAACACGAGGCGCTGTCTGCGAGTCGAGCTGTTTG  
GGAATGCAGCTCTAAGTGGGTGGTAAATTCCATCCAAGGCTAAATATTGGCAAGAGACCGATAGCGAACAAAGTACCGCGA  
GGGAAAGATGAAAAGGACTTTGAAAAGAGAGTTAAAAAGTGCTTGAAATTGCTGGGAGGGAAGCGAATGGAAGCTGCGGG  
TGTGCCCCGGTTGGATGTGGAACGGCTTCGGCTGGTCCGCCGCTCAACGCGGGGCACTGGTCAGCGTGGGCCATCGCGGG  
GGGACAAGAGCGGGATGTAGTTTCCCGCCTATGCCGTTGTGGTGGCCGAGGAACGAAGCGTGCG-CCACTTGTGG-CGTG  
GCA--TCCGTGCCAACTGCACGCTCGGGACGCTGGCGTATTGAGCTCTTCATCCGACCCGCTTTGAAACACGGACCAAGG  
AGTCTAACATGTATGCGAGCCGGTGGGCGGCAAAACCATTGAGGCGCAAGTAAACTGACA-TTT?A-AAAATTTATAAGT  
AATAAAATTAGTTGCTGATTGTATTGAAAAAATA-----TTT-----AGTATCA  
-----ACTC-----GATCA-----TT  
TAATTATTGAGTAAAAATTATTATCTTGAATTTATTACTTATATATACATAC-----AA-----AATAAAAAAA  
TAAAAAATTGTAACAAA-TAAATAT-----TTTTTATA-----GT  
ATCGAAAGATTATGAAATTATAAAATAATTAAAAATAAAAT--TTTTTTG-----TTTATTT-AAAAAAGAA  
ATTAGGCAATATTTTATTTTTTGTATTCTTTAATACGTTTTTAATTAAATTTTATTTTTATTAATTAGTTTAAACATTCA  
AAAGATTATTAGGTCAATGCTTAGAAAAATAAAAAATAATTTACTAAAAAATAATCTGAGTTGCATCAAATATAAAAAATA  
ATATACAATGATACTGTTTTGTATAGAAAAA-TCTGTTTATCTAAAAAATAGACAAAATTAAATATCAAAGAAGTTTTT  
TTATGAAAT----AAAAAAAACCTTATTTGTGCGAGCAGACCTCATCCTTGCAAGAGTTATCAATTGAG-AAAATTTTT  
AAAAAAAATA?T???TAAAATATA?T???AAT?TAAAAAAAATATAA?AAA-CTTAA--TAATTTGAGCTTTAGT  
AGAAAAAATTACTAAATGCTAGCTTTTCAGATTTCAGGGAACCTTAGGTTGAAAAAAGTATAAGCAATCCTGAGCCAAATTT  
TATTCTTTAAAAATAAAATAGGTGCAGAGACTCAATGGAAGCTATCCTAACGAAGAATATTTTAAGATTTTATT-AATTA  
AGTAATTAATTAATAAAAGTAAATTTAACTAAAAATTTTCTCTTTTATATATTAAGCGAGGATAAAAGATAGAGTCCAATTT  
TACATGTTACTTTTAGCAACAATTTAAATTGTAGTAAAAAGAAAATCCGTTGGCTTTAGTGACCGTGAGGGTTCAAGTCC  
CTCTACCCCCA-----AAAGT-----CTAA-----TT-----TTTTTCTTGACATAAGTT  
CTTAATTTTATGTTACGATAACCGAAACGAAACAA-TAAATAAAAAATT??TT?A

>P75\_comata

AAATCGTGGTGCCTCGCACCTCGAATTGTAGTCTGGAGAAGTGTCTCTGCAGCGGACCAGACCCAAGTTCACCTGGAAG  
TGGCGTCAGAGAGGGTGAAAACCCCGTCGAGTCTGGACACTGTTGCAACACGAGGCGCTGTCTGCGAGTCGAGCTGTTTG  
GGAATGCAGCTCTAAGTGGGTGGTAAATTCCATCCAAGGCTAAATATTGGCAAGAGACCGATAGCGAACAAGTACCGCGA  
GGGAAAGATGAAAAGGACTTTGAAAAGAGAGTTAAAAAGTGCTTGAAATTGCTGGGAGGGAAGCGAATGGAAGCTGCGGG  
TGTGCCCCGGTTGGATGTGGAACGGCTTCGGCTGGTCCGCCGCTCAACGCGGGGCACTGGTCAGCGTGGGCCATCGCGGC  
GGGACAAGAGCGGGATGTAGTTTCCCGCCTATGCCGTTGTGGTGGCCGAGGAACGAAGCGTGCG-CCACTTGTGG-CGTG  
GCA--TCCGTGCCAACTGCACGCTCGGGACGCTGGCGTATTGAGCTCTTCATCCGACCCGTCTTGAAACACGGACCAAGG  
AGTCTAACATGTATGCGAGCCGGTGGGCGGCAAACCCATTGAGGCGCAAGTAACTGACA-TTT?A-AAAATTTATAAGT  
AATAAAATTAGTTGCTGATTGTATTGAAAAAATA-----TTT-----AGTATCA  
-----ACTC-----GATCA-----TT  
TAATTATTGAGTAAAAATTATTATCTTGAATTTATTACTTATATATACATAC-----AA-----AATAAAAAAA  
TTAAAAATTGTAACAAA-TAAATAT-----TTTTATA-----GT  
ATCGAAAGATTATGAAATTATAAAATAATTAATAAAAAAT---TTTTTTG-----TTTATTT-AAAAAAGAA  
ATTAGGCAATATTTTATTTTTTGTATTCTTTAATACGTTTTTAATTAATTTTATTTTATTAATTAGTTTAACATTCA  
AAAGATTATTAGGTCAATGCTTAGAAAAATAAAAAATAATTTACTAAAAATAATCTGAGTTGCATCAAATATAAAAAATA  
ATATACAATGATACTGTTTTGTTATAGAAAAA-TCTGTTTATCTAAAAAATAGACAAAATTAAATATCAAAGAAGTTTTT  
TTATGAAAT-----AAAAAAAACCTTATTTGTCGAGCAGACCTCATCCTTGCAAGAGTTATCAATTGAG-AAAATTTTT  
AAAAAAAATA?T???TAAATATA?T???AAT?TTAAAAAAAATATAA?AAA-CTTAAA---TAATTTGAGCTTTAGT  
AGAAAACTTACTAAATGCTAGCTTTTTCAGATTCAGGGAACTTAGGTTGAAAAAGTATAAGCAATCCTGAGCCAAATTT  
TATTCCTTTAAAAATAAAATAGGTGCAGAGACTCAATGGAAGCTATCCTAACGAAGAATATTTTAAGATTTTATT-AATTA  
AGTAATTAATTAATAAAAGTAAATTTAACTAAAAATTTTCTCTTTTATATATTAAGCGAGGATAAAGATAGAGTCCAATTT  
TACATGTTACTTTTAGCAACAATTTAAATTGTAGTAAAAAGAAAATCCGTTGGCTTTAGTGACCGTGAGGGTTCAAGTCC  
CTCTACCCCA-----AAAGT-----CTAA-----TT-----TTTTCTTGACATAAGTT  
CTTAATTTATGTTACGATAACCGAAACGAAACAA-TAAATAAAAAATT?TT?A

>P76\_comata

AAATCGTGGTGCCTCGCACCTCGAATTGTAGTCTGGAGAAGTGTCTCTGCAGCGGACCAGACCCAAGTTCACCTGGAAG  
TGGCGTCAGAGAGGGTGAAAACCCCGTCGAGTCTGGACACTGTTGCAACACGAGGCGCTGTCTGCGAGTCGAGCTGTTTG  
GGAATGCAGCTCTAAGTGGGTGGTAAATTCCATCCAAGGCTAAATATTGGCAAGAGACCGATAGCGAACAAGTACCGCGA  
GGGAAAGATGAAAAGGACTTTGAAAAGAGAGTTAAAAAGTGCTTGAAATTGCTGGGAGGGAAGCGAATGGAAGCTGCGGG  
TGTGCCCCGGTTGGATGTGGAACGGCTTCGGCTGGTCCGCCGCTCAACGCGGGGCACTGGTCAGCGTGGGCCATCGCGGC  
GGGACAAGAGCGGGATGTAGTTTCCCGCCTATGCCGTTGTGGTGGCCGAGGAACGAAGCGTGCG-CCACTTGTGG-CGTG  
GCA--TCCGTGCCAACTGCACGCTCGGGACGCTGGCGTATTGAGCTCTTCATCCGACCCGTCTTGAAACACGGACCAAGG  
AGTCTAACATGTATGCGAGCCGGTGGGCGGCAAACCCATTGAGGCGCAAGTAACTGACA-TTT?A-AAAATTTATAAGT  
AATAAAATTAGTTGCTGATTGTATTGAAAAAATA-----TTT-----AGTATCA  
-----ACTC-----GATCA-----TT  
TAATTATTGAGTAAAAATTATTATCTTGAATTTATTACTTATATATACATAC-----AA-----AATAAAAAAA  
TTAAAAATTGTAACAAA-TAAATAT-----TTTTATA-----GT  
ATCGAAAGATTATGAAATTATAAAATAATTAATAAAAAAT---TTTTTTG-----TTTATTT-AAAAAAGAA  
ATTAGGCAATATTTTATTTTTTGTATTCTTTAATACGTTTTTAATTAATTTTATTTTATTAATTAGTTTAACATTCA  
AAAGATTATTAGGTCAATGCTTAGAAAAATAAAAAATAATTTACTAAAAATAATCTGAGTTGCATCAAATATAAAAAATA  
ATATACAATGATACTGTTTTGTTATAGAAAAA-TCTGTTTATCTAAAAAATAGACAAAATTAAATATCAAAGAAGTTTTT  
TTATGAAAT-----AAAAAAAACCTTATTTGTCGAGCAGACCTCATCCTTGCAAGAGTTATCAATTGAG-AAAATTTTT  
AAAAAAAATA?T???TAAATATA?T???AAT?TTAAAAAAAATATAA?AAA-CTTAAA---TAATTTGAGCTTTAGT  
AGAAAACTTACTAAATGCTAGCTTTTTCAGATTCAGGGAACTTAGGTTGAAAAAGTATAAGCAATCCTGAGCCAAATTT  
TATTCCTTTAAAAATAAAATAGGTGCAGAGACTCAATGGAAGCTATCCTAACGAAGAATATTTTAAGATTTTATT-AATTA  
AGTAATTAATTAATAAAAGTAAATTTAACTAAAAATTTTCTCTTTTATATATTAAGCGAGGATAAAGATAGAGTCCAATTT  
TACATGTTACTTTTAGCAACAATTTAAATTGTAGTAAAAAGAAAATCCGTTGGCTTTAGTGACCGTGAGGGTTCAAGTCC  
CTCTACCCCA-----AAAGT-----CTAA-----TT-----TTTTCTTGACATAAGTT  
CTTAATTTATGTTACGATAACCGAAACGAAACAA-TAAATAAAAAATT?TT?A

>P79\_comata

AAATCGTGGTGCCTCGCACCTCGAATTGTAGTCTGGAGAAGTGTCTCTGCAGCGGACCAGACCCAAGTTCACCTGGAAG  
TGGCGTCAGAGAGGGTGAAAACCCCGTCGAGTCTGGACACTGTTGCAACACGAGGCGCTGTCTGCGAGTCGAGCTGTTTG  
GGAATGCAGCTCTAAGTGGGTGGTAAATTCCATCCAAGGCTAAATATTGGCAAGAGACCGATAGCGAACAAGTACCGCGA  
GGGAAAGATGAAAAGGACTTTGAAAAGAGAGTTAAAAAGTGCTTGAAATTGCTGGGAGGGAAGCGAATGGAAGCTGCGGG  
TGTGCCCCGGTTGGATGTGGAACGGCTTCGGCTGGTCCGCCGCTCAACGCGGGGCACTGGTCAGCGTGGGCCATCGCGGC  
GGGACAAGAGCGGGATGTAGTTTCCCGCCTATGCCGTTGTGGTGGCCGAGGAACGAAGCGTGCG-CCACTTGTGG-CGTG  
GCA--TCCGTGCCAACTGCACGCTCGGGACGCTGGCGTATTGAGCTCTTCATCCGACCCGTCTTGAAACACGGACCAAGG

AGTCTAACATGTATGCGAGCCGGTGGGCGGCAAACCCATTGAGGCGCAAGTAACTGACA-TTT?A-AAAATTTATAAGT  
AATAAAATTAGTTGCTGATTGTATTGAAAAAATA-----TTT-----AGTATCA  
-----ACTC-----GATCA-----TT  
TAATTATTGAGTAAAAATTATTATCTTGAATTTATTACTTATATATACATAC-----AA-----AATAAAAAAA  
TTAAAAATTGTAACAAA-TAAATAT-----TTTTTATA-----GT  
ATCGAAAGATTATGAAATTATAAAATAATTTAAATAAAAAAT---TTTTTTG-----TTTATTT-AAAAAAGAA  
ATTAGGCAATATTTTATTTTTTGTATTCTTTAATACGTTTTTAATTAAATTTTATTTTATTAATTAGTTTAACATTCA  
AAAGATTATTAGGTCAATGCTTAGAAAAATAAAAAATAATTTACTAAAAATAATCTGAGTTGCATCAAATATAAAAAATA  
ATATACAATGATACTGTTTTGTTATAGAAAAA-TCTGTTTATCTAAAAAATAGACAAAATTAAATATCAAAGAAGTTTTT  
TTATGAAAT-----AAAAAAAACCTATTTGTCGAGCAGACCTCATCCTTGCAAGAGTTATCAATTGAG-AAAATTTTT  
AAAAAATAA?T???TAAATATA?T???AAT?TTAAAAAATA?TA?AAA-CTTAAA---TAATTTGAGCTTTAGT  
AGAAAACTTACTAAATGCTAGCTTTTCTAGATTTCAGGGAACTTAGGTTGAAAAAGTATAAGCAATCCTGAGCCAAATTT  
TATTCCTTTAAAAATAAAATAGGTGCAGAGACTCAATGGAAGCTATCCTAACGAAGAATATTTTAAGATTTTATT-AATTA  
AGTAATTAATTAATAAAAGTAAATTTAACTAAAATTTTCTCTTTTATATATTAAGCGAGGATAAAGATAGAGTCCAATTT  
TACATGTTACTTTTAGCAACAATTTAAATTGTAGTAAAAAGAAAATCCGTTGGCTTTAGTGACCGTGAGGGTTCAAGTCC  
CTCTACCCCCA-----AAAGT-----CTAA-----TT-----TTTTCTTGACATAAGTT  
CTTAATTTATGTTACGATAACCGAAACGAAACAA-TAAATAAAAAATT?TT?A

>P80\_comata

AAATCGTGGTGCCTCGCACCTCGAATTGTAGTCTGGAGAAGTGTCTCTGCAGCGGACCAGACCCAAGTTCAGTGGAAAG  
TGGCGTCAGAGAGGGTGAAAACCCCGTCGAGTCTGGACACTGTTGCAACACGAGGCGCTGTCTGCGAGTCGAGCTGTTTG  
GGAATGCAGCTCTAAGTGGGTGGTAAATTCATCCAAGGCTAAATATTGGCAAGAGACCGATAGCGAACAAGTACCGCGA  
GGGAAAGATGAAAAGGACTTTGAAAAGAGAGTTAAAAAGTGCTTGAAATTGCTGGGAGGGAAGCGAATGGAAGCTGCGGG  
TGTGCCCCGGTTGGATGTGGAACGGCTTCGGCTGGTCCGCCGCTCAACGCGGGGCACTGGTCAGCGTGCGGCCATCGCGGC  
GGGACAAGAGCGGGATGTAGTTTCCCGCCTATGCCGTTGTGGTGGCCGAGGAACGAAGCGTGCG-CCACTTGTGG-CGTG  
GCA--TCCGTGCCAACTGCACGCTCGGGACGCTGGCGTATTGAGCTCTTCATCCGACCCGCTCTTGAAACACGGACCAAGG  
AGTCTAACATGTATGCGAGCCGGTGGGCGGCAAACCCATTGAGGCGCAAGTAACTGACA-TTT?A-AAAATTTATAAGT  
AATAAAATTAGTTGCTGATTGTATTGAAAAAATA-----TTT-----AGTATCA  
-----ACTC-----GATCA-----TT  
TAATTATTGAGTAAAAATTATTATCTTGAATTTATTACTTATATATACATAC-----AA-----AATAAAAAAA  
TTAAAAATTGTAACAAA-TAAATAT-----TTTTTATA-----GT  
ATCGAAAGATTATGAAATTATAAAATAATTTAAATAAAAAAT---TTTTTTG-----TTTATTT-AAAAAAGAA  
ATTAGGCAATATTTTATTTTTTGTATTCTTTAATACGTTTTTAATTAAATTTTATTTTATTAATTAGTTTAACATTCA  
AAAGATTATTAGGTCAATGCTTAGAAAAATAAAAAATAATTTACTAAAAATAATCTGAGTTGCATCAAATATAAAAAATA  
ATATACAATGATACTGTTTTGTTATAGAAAAA-TCTGTTTATCTAAAAAATAGACAAAATTAAATATCAAAGAAGTTTTT  
TTATGAAAT-----AAAAAAAACCTATTTGTCGAGCAGACCTCATCCTTGCAAGAGTTATCAATTGAG-AAAATTTTT  
AAAAAATAA?T???TAAATATA?T???AAT?TTAAAAAATA?TA?AAA-CTTAAA---TAATTTGAGCTTTAGT  
AGAAAACTTACTAAATGCTAGCTTTTCTAGATTTCAGGGAACTTAGGTTGAAAAAGTATAAGCAATCCTGAGCCAAATTT  
TATTCCTTTAAAAATAAAATAGGTGCAGAGACTCAATGGAAGCTATCCTAACGAAGAATATTTTAAGATTTTATT-AATTA  
AGTAATTAATTAATAAAAGTAAATTTAACTAAAATTTTCTCTTTTATATATTAAGCGAGGATAAAGATAGAGTCCAATTT  
TACATGTTACTTTTAGCAACAATTTAAATTGTAGTAAAAAGAAAATCCGTTGGCTTTAGTGACCGTGAGGGTTCAAGTCC  
CTCTACCCCCA-----AAAGT-----CTAA-----TT-----TTTTCTTGACATAAGTT  
CTTAATTTATGTTACGATAACCGAAACGAAACAA-TAAATAAAAAATT?TT?A

>P81\_comata

AAATCGTGGTGCCTCGCACCTCGAATTGTAGTCTGGAGAAGTGTCTCTGCAGCGGACCAGACCCAAGTTCAGTGGAAAG  
TGGCGTCAGAGAGGGTGAAAACCCCGTCGAGTCTGGACACTGTTGCAACACGAGGCGCTGTCTGCGAGTCGAGCTGTTTG  
GGAATGCAGCTCTAAGTGGGTGGTAAATTCATCCAAGGCTAAATATTGGCAAGAGACCGATAGCGAACAAGTACCGCGA  
GGGAAAGATGAAAAGGACTTTGAAAAGAGAGTTAAAAAGTGCTTGAAATTGCTGGGAGGGAAGCGAATGGAAGCTGCGGG  
TGTGCCCCGGTTGGATGTGGAACGGCTTCGGCTGGTCCGCCGCTCAACGCGGGGCACTGGTCAGCGTGCGGCCATCGCGGC  
GGGACAAGAGCGGGATGTAGTTTCCCGCCTATGCCGTTGTGGTGGCCGAGGAACGAAGCGTGCG-CCACTTGTGG-CGTG  
GCA--TCCGTGCCAACTGCACGCTCGGGACGCTGGCGTATTGAGCTCTTCATCCGACCCGCTCTTGAAACACGGACCAAGG  
AGTCTAACATGTATGCGAGCCGGTGGGCGGCAAACCCATTGAGGCGCAAGTAACTGACA-TTT?A-AAAATTTATAAGT  
AATAAAATTAGTTGCTGATTGTATTGAAAAAATA-----TTT-----AGTATCA  
-----ACTC-----GATCA-----TT  
TAATTATTGAGTAAAAATTATTATCTTGAATTTATTACTTATATATACATAC-----AA-----AATAAAAAAA  
TTAAAAATTGTAACAAA-TAAATAT-----TTTTTATA-----GT  
ATCGAAAGATTATGAAATTATAAAATAATTTAAATAAAAAAT---TTTTTTG-----TTTATTT-AAAAAAGAA  
ATTAGGCAATATTTTATTTTTTGTATTCTTTAATACGTTTTTAATTAAATTTTATTTTATTAATTAGTTTAACATTCA  
AAAGATTATTAGGTCAATGCTTAGAAAAATAAAAAATAATTTACTAAAAATAATCTGAGTTGCATCAAATATAAAAAATA

ATATACAATGATACTGTTTTGTTATAGAAAAA-TCTGTTTATCTAAAAAATAGACAAAATTAAATATCAAAGAAGTTTTT  
TTATGAAAT-----AAAAAAAACCTTATTTGTCGAGCAGACCTCATCCTTGCAAGAGTTATCAATTGAG-AAAATTTTT  
AAAAAAAATA?T???TAAAATATA?T???AAT?TAAAAAAAATATAA?AAA-CTTAAA---TAATTTGAGCTTTAGT  
AGAAAACTTACTAAATGCTAGCTTTTCAGATTCAGGGAACTTAGGTTGAAAAAGTATAAGCAATCCTGAGCCAAATTT  
TATTCCTTTAAAAATAAAATAGGTGCAGAGACTCAATGGAAGCTATCCTAACGAAGAATATTTTAAGATTTTATT-AATTA  
AGTAATTAATTAATAAAAAGTAAATTTAACTAAAATTTTCTCTTTTATATATTAAGCGAGGATAAAGATAGAGTCCAATTT  
TACATGTTACTTTTAGCAACAATTTAAATTGTAGTAAAAAGAAAATCCGTTGGCTTTAGTGACCGTGAGGGTTCAAGTCC  
CTCTACCCCA-----AAAGT-----CTAA-----TT-----TTTTCTTGACATAAGTT  
CTTAATTTATGTTACGATAACCGAAACGAAACAA-TAAATAAAAAATT?TT?A  
>P82\_comata  
AAATCGTGGTGCCTCGCACCTCGAATTGTAGTCTGGAGAAGTGTCTCTGCAGCGGACCAGACCCAAGTTCCTGAAAG  
TGGCGTCAGAGAGGGTGAAAACCCCGTCGAGTCTGGACACTGTTGCAACACGAGGCGCTGTCTGCGAGTCGAGCTGTTG  
GGAATGCAGCTCTAAGTGGGTGGTAAATTCATCCAAGGCTAAATATTGGCAAGAGACCGATAGCGAACAAGTACCGCGA  
GGGAAAGATGAAAAGGACTTTGAAAAGAGAGTTAAAAAGTGCTTGAAATGCTGGGAGGGAAGCGAATGGAAGCTGCGGG  
TGTGCCCCGGTTGGATGTGGAACGGCTTCGGCTGGTCCGCCGCTCAACGCGGGGCACTGGTCAGCGTGGGCCATCGCGGC  
GGGACAAGAGCGGGATGTAGTTTCCCGCCTATGCCGTTGTGGTGGCCGAGGAACGAAGCGTGCG-CCACTTGTGG-CGTG  
GCA--TCCGTGCCAACTGCACGCTCGGGACGCTGGCGTATTGAGCTCTTCATCCGACCCGCTCTTGAAACACGGACCAAGG  
AGTCTAACATGTATGCGAGCCGGTGGGCGGCAAACCCATTGAGGCGCAAGTAACTGACA-TTT?A-AAAATTTATAAGT  
AATAAAATTAGTTGCTGATTGTATTGAAAAATA-----TTT-----AGTATCA  
-----ACTC-----GATCA-----TT  
TAATTATTGAGTAAATTTATTATCTTGAATTTATTACTTATATATACATAC-----AA-----AATAAAAAAA  
TTAAAAATTGTAACAAA-TAAATAT-----TTTTTATA-----GT  
ATCGAAAGATTATGAAATTATAAAATAATTAATAAAAAAT---TTTTTTG-----TTTATTT-AAAAAAGAA  
ATTAGGCAATATTTTATTTTTTGTATTCTTTAATACGTTTTTAATTAATTTTATTTTATTAATTAGTTTAACATTCA  
AAAGATTATTAGGTCAATGCTTAGAAAAATAAAATAATTTACTAAAAATAATCTGAGTTGCATCAAATATAAAAAATA  
ATATACAATGATACTGTTTTGTTATAGAAAAA-TCTGTTTATCTAAAAAATAGACAAAATTAAATATCAAAGAAGTTTTT  
TTATGAAAT-----AAAAAAAACCTTATTTGTCGAGCAGACCTCATCCTTGCAAGAGTTATCAATTGAG-AAAATTTTT  
AAAAAAAATA?T???TAAAATATA?T???AAT?TAAAAAAAATA?TA?AAA-CTTAAA---TAATTTGAGCTTTAGT  
AGAAAACTTACTAAATGCTAGCTTTTCAGATTCAGGGAACTTAGGTTGAAAAAGTATAAGCAATCCTGAGCCAAATTT  
TATTCCTTTAAAAATAAAATAGGTGCAGAGACTCAATGGAAGCTATCCTAACGAAGAATATTTTAAGATTTTATT-AATTA  
AGTAATTAATTAATAAAAAGTAAATTTAACTAAAATTTTCTCTTTTATATATTAAGCGAGGATAAAGATAGAGTCCAATTT  
TACATGTTACTTTTAGCAACAATTTAAATTGTAGTAAAAAGAAAATCCGTTGGCTTTAGTGACCGTGAGGGTTCAAGTCC  
CTCTACCCCA-----AAAGT-----CTAA-----TT-----TTTTCTTGACATAAGTT  
CTTAATTTATGTTACGATAACCGAAACGAAACAA-TAAATAAAAAATT?TT?A
